# Supplementary material for: A model of potential carbon dioxide efflux from surface water across England and Wales using headwater stream survey data and landscape predictors
Source: Copernicus journal article supplement (doi:10.5194/bg-11-1911-2014), 2014-04-08
Supplement: Supplementary file 1 [file bg-11-1911-2014-supplement.zip]

Archive with 11 entries (11 files):
- Fig1.pdf
- Fig2.pdf
- Fig3.pdf
- Fig4.pdf
- Fig5.pdf
- Fig6.pdf
- Fig7.pdf
- Fig8.pdf
- Fig9.pdf
- supp.csv
- supplementary file.pdf
