# Supplementary material for: A model of potential carbon dioxide efflux from surface water across England and Wales using headwater stream survey data and landscape predictors
Source: Copernicus journal article supplement (doi:10.5194/bg-11-1911-2014), 2014-04-08
Supplement: Supplementary file 1 [file bg-11-1911-2014-supplement.zip › supp.csv]

Date	uatm_pco2	Alt	slope	rel	newLC	yday	log_lin	yday_trig	ST
1988-08-08	0.006262	409.364478677	3.91152620063	90.573486328	Less managed	221	-5.06530269543856	3.80433959694983	S
1988-08-08	3e-06	321.481931525	5.20299416073	55.459259033	Impr. Grass	221	-9.84521864441215	3.80433959694983	S
1989-06-21	0.010375	299.168480049	7.90091475573	128.203262329	Impr. Grass	172	-4.56354851129727	2.96084348721887	S
1989-06-20	0.001758	128.731076503	6.03862843492	387.5437507632	Impr. Grass	171	-6.31553401701215	2.94362928089783	S
1989-06-21	0.003392	242.697952628	5.33798831318	176.328521729	Impr. Grass	172	-5.67170258119279	2.96084348721887	S
1989-06-21	0.004055	297.080481504	6.97103098354	166.571502686	Impr. Grass	172	-5.49554953607775	2.96084348721887	S
1989-06-19	0.004243	170.238294142	6.17943440731	240.1275024414	Impr. Grass	170	-5.45076948973971	2.92641507457679	S
1989-06-19	0.001677	168.461034021	5.51637529894	199.9342422488	Impr. Grass	170	-6.3613694798176	2.92641507457679	S
1989-06-21	0.004516	281.747422438	9.44083290834	154.876251221	Impr. Grass	172	-5.38911773087453	2.96084348721887	S
1989-06-19	0.003085	160.22072491	6.86313134959	386.0687522891	Impr. Grass	170	-5.76512610489725	2.92641507457679	S
1989-06-19	0.000209	110.958715013	5.99622739647	192.3234977726	Impr. Grass	170	-8.25868249626474	2.92641507457679	S
1989-06-20	0.002411	220.959906578	7.25258028507	68.069732666	Impr. Grass	171	-6.00718750757322	2.94362928089783	S
1989-06-19	0.003007	78.0645090654	3.51379399198	111.880500793	Impr. Grass	170	-5.79032123607344	2.92641507457679	S
1989-06-21	0.008734	104.097675821	2.41060339429	91.1852493286	Arable	172	-4.73482339421496	2.96084348721887	S
1989-06-21	0.003683	270.743010657	6.76274948097	208.549743653	Impr. Grass	172	-5.59054307904969	2.96084348721887	S
1989-06-19	0.005193	147.699696721	1.28303860088	11.025756836	Arable	170	-5.25086142539174	2.92641507457679	S
1989-06-21	0.010392	47.0710980621	1.79320703805	53.0249996186	Impr. Grass	172	-4.56191914399378	2.96084348721887	S
1989-06-20	0.002277	208.902778439	10.867791186	172.138259888	Arable	171	-6.06317539466198	2.94362928089783	S
1989-06-19	0.003089	119.376266563	4.74431384134	58.3927459713	Impr. Grass	170	-5.76385100112232	2.92641507457679	S
1989-06-21	0.000857	240.689582337	6.21459907811	253.061004639	Impr. Grass	172	-7.00536810784914	2.96084348721887	S
1989-06-20	0.003333	93.7403116623	2.50956960648	131.559997559	Impr. Grass	171	-5.68899238918357	2.94362928089783	S
1989-06-20	0.002044	104.836136211	4.54261355079	164.5087509154	Impr. Grass	171	-6.16867916653379	2.94362928089783	S
1989-06-21	0.002416	210.918251736	5.69753526148	254.230514526	Impr. Grass	172	-6.00515787423998	2.96084348721887	S
1989-06-21	0.001262	211.288043306	5.87282059211	128.658752441	Impr. Grass	172	-6.63620258846024	2.96084348721887	S
1989-06-22	0.006805	190.621215358	7.01746193749	153.335998535	Impr. Grass	173	-4.98277696596786	2.97805769353991	S
1989-06-21	0.001152	268.364368471	8.20020543787	180.89151001	Impr. Grass	172	-6.72376844286912	2.96084348721887	S
1989-06-22	0.001428	320.148328583	8.48280914827	154.425750732	Impr. Grass	173	-6.51706545645613	2.97805769353991	S
1989-06-21	0.0015	193.362132481	4.75436859755	26.928497314	Impr. Grass	172	-6.46950034805098	2.96084348721887	S
1989-06-21	0.004299	115.184050414	3.17433089823	91.1514968876	Impr. Grass	172	-5.43780934536664	2.96084348721887	S
1989-06-21	0.002947	185.028316903	4.87583471327	219.770233154	Impr. Grass	172	-5.81014349064761	2.96084348721887	S
1989-06-20	0.003607	244.082331792	7.54326931234	208.071762085	Impr. Grass	171	-5.61111213981489	2.94362928089783	S
1989-06-19	0.007716	162.80579387	3.86055682033	42.42074585	Impr. Grass	170	-4.85800004767266	2.92641507457679	S
1989-06-22	0.003881	281.777627563	8.21708386966	85.515991211	Impr. Grass	173	-5.53886143254241	2.97805769353991	S
1989-06-21	0.00408	49.0348816941	1.56347331412	29.5792503357	Impr. Grass	172	-5.4894778720092	2.96084348721887	S
1989-06-21	0.001815	253.366100992	6.38085683116	201.633270263	Impr. Grass	172	-6.28449422588636	2.96084348721887	S
1989-06-23	0.017947	267.53029024	7.21864654506	180.792510986	Impr. Grass	174	-4.01755020164307	2.99527189986095	S
1989-06-21	0.002473	261.419835163	6.69358188227	161.965240479	Impr. Grass	172	-5.98230660932322	2.96084348721887	S
1989-06-21	0.001854	229.48882684	5.2220511944	193.722518921	Impr. Grass	172	-6.26379834261296	2.96084348721887	S
1989-06-22	0.000693	275.711460114	9.27026701659	237.701492309	Impr. Grass	173	-7.20481451324651	2.97805769353991	S
1989-06-20	0.001812	161.608983945	3.33069490011	72.571502685	Impr. Grass	171	-6.28610410012726	2.94362928089783	S
1989-06-21	0.00415	289.299377441	4.83708739281	97.994750977	Impr. Grass	172	-5.47267075369281	2.96084348721887	S
1989-06-22	0.003696	194.312444374	5.21056345402	218.1369781495	Impr. Grass	173	-5.58706667496024	2.97805769353991	S
1989-06-19	0.005034	202.493920314	7.04344920042	253.154251099	Impr. Grass	170	-5.28165692565493	2.92641507457679	S
1989-06-20	0.001796	73.2474649317	3.8680973053	126.8757553103	Arable	171	-6.29473414290148	2.94362928089783	S
1989-06-21	0.002381	159.256780672	4.4219422274	253.028244018	Impr. Grass	172	-6.01945258364815	2.96084348721887	S
1989-06-21	0.001084	319.22548343	9.83481881557	129.709503174	Impr. Grass	172	-6.78200407367658	2.96084348721887	S
1989-06-21	0.001414	327.61125946	6.56640344693	102.921508789	Impr. Grass	172	-6.52658286344302	2.96084348721887	S
1989-06-21	0.004824	148.323719166	3.19588356327	25.661254883	Impr. Grass	172	-5.32384032377912	2.96084348721887	S
1989-06-19	0.00246	168.465471409	6.40188744244	131.214508057	Impr. Grass	170	-5.98747252583844	2.92641507457679	S
1989-06-21	0.002438	61.4666124002	0.94043389192	18.7130012513	Impr. Grass	172	-5.9962761041052	2.96084348721887	S
1989-06-22	0.014498	204.332493184	5.23757340217	246.8205108645	Impr. Grass	173	-4.23030175185739	2.97805769353991	S
1989-06-23	0.014846	267.275393839	9.47499148522	201.587005615	Impr. Grass	174	-4.20666255844743	2.99527189986095	S
1989-06-23	0.001548	351.857056438	6.88129352146	304.949249268	Impr. Grass	174	-6.43900243163805	2.99527189986095	S
1989-06-25	0.001747	262.863424827	9.93977160341	184.430480957	Impr. Grass	176	-6.32163667118072	3.02970031250303	S
1989-06-23	0.010053	334.561396031	4.71455186632	248.043243409	Impr. Grass	174	-4.59492286953654	2.99527189986095	S
1989-06-25	0.013425	72.4503234296	3.31897774018	120.3969993594	Impr. Grass	176	-4.30691916218708	3.02970031250303	S
1989-06-23	0.002983	260.451470814	4.30011938061	102.649993897	Impr. Grass	174	-5.79820305027569	2.99527189986095	S
1989-06-23	0.006747	259.432654166	9.84649033804	160.103240967	Impr. Grass	174	-4.99127394061764	2.99527189986095	S
1989-06-23	0.007574	350.130748516	6.04901659472	273.604492188	Impr. Grass	174	-4.87645411263024	2.99527189986095	S
1989-06-23	0.003355	239.818564758	6.41208109021	81.509994507	Impr. Grass	174	-5.68251033938066	2.99527189986095	S
1989-06-22	0.001284	297.475847138	11.9958812006	155.601989746	Impr. Grass	173	-6.6195733314887	2.97805769353991	S
1989-06-22	0.001548	262.169792522	12.8327969855	105.928024292	Impr. Grass	173	-6.43900243163805	2.97805769353991	S
1989-06-22	0.001037	311.39467577	10.1982547171	144.246994019	Impr. Grass	173	-6.82433367084306	2.97805769353991	S
1989-06-23	0.010817	237.894334893	5.9351312424	57.664993286	Impr. Grass	174	-4.52202460490142	2.99527189986095	S
1989-06-23	0.0089	285.597511644	8.16632633368	138.404022217	Impr. Grass	174	-4.71610174669537	2.99527189986095	S
1989-06-22	0.001391	339.121303839	8.72762767202	92.441253662	Impr. Grass	173	-6.54241796196475	2.97805769353991	S
1989-06-22	0.015798	95.1698807904	5.84468146944	285.6487503056	Impr. Grass	173	-4.14471196958589	2.97805769353991	S
1989-06-23	0.006177	252.23339642	3.40179165779	92.674758911	Impr. Grass	174	-5.07886060309182	2.99527189986095	S
1989-06-23	0.004259	290.627450497	6.89590571282	88.496246338	Impr. Grass	174	-5.44704942034844	2.99527189986095	S
1989-06-23	0.00266	370.58911191	6.70696630333	249.537963867	Impr. Grass	174	-5.91080664409053	2.99527189986095	S
1989-06-23	0.005836	314.158103119	5.52232763549	126.718231202	Impr. Grass	174	-5.13517862917086	2.99527189986095	S
1989-06-23	0.012064	265.064024292	7.19732277395	196.140243531	Impr. Grass	174	-4.41339347042338	2.99527189986095	S
1989-06-23	9e-05	302.989000764	5.81373535182	179.074737549	Impr. Grass	174	-8.87386813535497	2.99527189986095	S
1989-07-25	0.004364	68.5015093771	1.14850884852	27.092754364	Arable	206	-5.42297397114759	3.54612650213423	S
1988-06-22	0.000725	543.024507641	7.89691156916	174.781524658	Less managed	174	-7.16264752861093	2.99527189986095	S
1988-06-21	0.00133	479.12981987	9.67218657434	162.666534424	Less managed	173	-6.58567177981302	2.97805769353991	S
1988-06-21	0.001225	507.629832408	6.84811431081	214.096496582	Less managed	173	-6.66480910037175	2.97805769353991	S
1988-06-22	0.000531	490.166751269	9.833170528	283.442230225	Less managed	174	-7.45075980111236	2.99527189986095	S
1988-06-22	0.000826	482.727841314	4.44227687245	72.660491944	Less managed	174	-7.04014446702788	2.99527189986095	S
1988-06-21	0.00054	486.541789037	4.61424930883	88.851745605	Less managed	173	-7.43538802106451	2.97805769353991	S
1988-06-21	0.001249	496.373854586	5.57205540864	159.180725098	Less managed	173	-6.64616054129367	2.97805769353991	S
1988-06-21	0.001649	477.943740336	12.9453584909	92.103240967	Less managed	173	-6.37771543629234	2.97805769353991	S
1988-06-22	0.000748	476.949733189	6.2166732407	176.040740967	Less managed	174	-7.13340196051447	2.99527189986095	S
1988-06-22	0.001059	526.390344664	6.46130781811	115.460235596	Less managed	174	-6.80429657061391	2.99527189986095	S
1988-06-21	0.001248	482.230877589	8.80411123283	105.405273438	Less managed	173	-6.64693066070024	2.97805769353991	S
1988-06-21	0.001743	472.466404106	5.97316480315	105.26373291	Less managed	173	-6.32386508435914	2.97805769353991	S
1988-06-21	0.002091	472.996086764	6.50979933304	181.733245849	Less managed	173	-6.14648226937459	2.97805769353991	S
1988-06-21	0.001337	488.991031647	9.06717185428	103.044281006	Less managed	173	-6.58061213764944	2.97805769353991	S
1988-06-21	0.002132	502.501679118	5.21549670335	108.234985351	Less managed	173	-6.12751339157126	2.97805769353991	S
1988-06-21	0.000653	531.545463414	5.83825679871	159.565490723	Less managed	173	-7.26015366615361	2.97805769353991	S
1988-06-25	0.003324	278.940030295	4.82538782959	220.105728149	Impr. Grass	177	-5.69165629485836	3.04691451882407	S
1988-06-22	0.000409	542.286927897	5.25468084279	146.926513672	Less managed	174	-7.68646034790373	2.99527189986095	S
1988-06-22	0.00054	517.225356459	7.79436009664	243.244995117	Less managed	174	-7.43538802106451	2.99527189986095	S
1988-06-24	0.001693	264.417893043	5.63261464334	130.933517456	Impr. Grass	176	-6.35214751244425	3.02970031250303	S
1988-06-22	0.011275	559.38370651	3.16549892895	61.9345703130001	Less managed	174	-4.48074260761304	2.99527189986095	S
1988-06-24	0.002335	404.725314617	6.40106604807	167.171264648	Less managed	176	-6.03855615464183	3.02970031250303	S
1988-06-22	0.000596	567.54246739	5.91588883911	107.782775879	Less managed	174	-7.34471105418167	2.99527189986095	S
1988-06-24	0.001434	488.810145652	11.4747561743	285.797485352	Less managed	176	-6.51301413423695	3.02970031250303	S
1988-06-23	0.001593	444.414727573	3.05063263309	68.6897583000001	Less managed	175	-6.41123143992701	3.01248610618199	S
1988-06-24	0.001109	438.027529794	5.21278594291	116.68725586	Less managed	176	-6.76019771462452	3.02970031250303	S
1988-06-24	0.003213	384.656639099	12.1727866173	120.48727417	Less managed	176	-5.72510826137095	3.02970031250303	S
1988-06-24	0.002234	372.018710512	9.89996435882	270.5625	Less managed	176	-6.08182698718837	3.02970031250303	S
1988-06-22	0.000598	504.318180241	8.23063462984	201.692260742	Less managed	174	-7.341619861612	2.99527189986095	S
1988-06-23	0.002031	521.038156001	4.60735277924	102.473968506	Less managed	175	-6.17490673157064	3.01248610618199	S
1988-06-24	0.00117	389.287520077	8.4362853248	121.075256348	Less managed	176	-6.70890442023697	3.02970031250303	S
1988-06-25	0.001479	359.320285461	8.84846903822	204.441482544	Impr. Grass	177	-6.48314135203521	3.04691451882407	S
1988-06-24	0.001198	404.009510162	10.1534473255	301.607513428	Less managed	176	-6.6862130090349	3.02970031250303	S
1988-06-22	0.000418	512.181360981	8.3601074535	285.133728027	Less managed	174	-7.66704226204663	2.99527189986095	S
1988-06-23	0.000883	511.498300073	4.35557884084	117.242706299	Less managed	175	-6.97710535711693	3.01248610618199	S
1988-06-23	0.002218	473.408446493	5.60998923912	212.75326538	Less managed	175	-6.08885689311663	3.01248610618199	S
1988-06-24	0.000879	457.89492152	7.92586463277	262.03125	Less managed	176	-6.98140181915044	3.02970031250303	S
1988-06-24	0.000774	377.261735485	13.1892157985	178.554992676	Less managed	176	-7.1013400280548	3.02970031250303	S
1988-06-24	0.001233	336.921979798	8.39010706815	209.648010254	Impr. Grass	176	-6.65855419334864	3.02970031250303	S
1988-06-22	0.001676	539.552287045	4.35817581021	118.494995117	Less managed	174	-6.3619486863209	2.99527189986095	S
1988-06-24	0.000981	400.648123864	12.682323706	167.86251831	Less managed	176	-6.87722607394731	3.02970031250303	S
1988-06-23	0.002357	487.310567644	4.24325175045	96.5835266110001	Less managed	175	-6.0293741201812	3.01248610618199	S
1988-06-24	0.002129	434.370023644	7.17715813414	82.463256836	Less managed	176	-6.12888922301965	3.02970031250303	S
1988-06-23	0.002512	444.84063486	4.00834762744	34.194274902	Less managed	175	-5.96696707550759	3.01248610618199	S
1988-06-21	0.001449	453.035500243	6.74620185736	121.385253906	Less managed	173	-6.50295705986168	2.97805769353991	S
1988-06-21	0.002385	501.167401756	5.64324173891	103.985229492	Less managed	173	-6.01780852244758	2.97805769353991	S
1988-06-21	0.001497	416.353214848	8.81565734261	99.441741943	Less managed	173	-6.47143770739121	2.97805769353991	S
1988-06-23	0.002351	400.77841408	5.91220344074	104.562744141	Less managed	175	-6.03186996174302	3.01248610618199	S
1988-06-22	0.000706	424.28869674	8.77422371815	119.62625122	Less managed	174	-7.18746918178474	2.99527189986095	S
1988-06-23	0.005365	387.84096248	9.72249282133	54.712005615	Less managed	175	-5.21858239852918	3.01248610618199	S
1988-06-23	0.002198	429.739870959	5.31580120016	87.629486084	Less managed	175	-6.09771434695069	3.01248610618199	S
1988-06-21	0.003	455.640232729	5.92168185299	69.506500244	Less managed	173	-5.79261368836282	2.97805769353991	S
1988-06-21	0.000855	436.60076677	6.25865342896	101.587738037	Less managed	173	-7.00757561426435	2.97805769353991	S
1988-06-22	0.001067	452.931385241	14.597125124	170.343231201	Less managed	174	-6.79710875889507	2.99527189986095	S
1988-06-22	0.000946	442.832863548	3.94456798922	43.243499756	Less managed	174	-6.91176330037968	2.99527189986095	S
1988-06-21	0.001309	447.78225215	10.5053853924	130.779754638	Less managed	173	-6.60100614381313	2.97805769353991	S
1988-06-23	0.003162	438.030509407	5.05728800807	91.527770996	Less managed	175	-5.74086148289762	3.01248610618199	S
1988-06-23	0.001522	401.572093201	3.45910500586	56.538757324	Less managed	175	-6.45540658497512	3.01248610618199	S
1988-06-23	0.001203	404.837297305	5.3642863154	104.727722168	Less managed	175	-6.68221460306821	3.01248610618199	S
1988-06-22	0.001414	364.71516333	13.511370451	210.401763916	Less managed	174	-6.52658286344302	2.99527189986095	S
1988-06-23	0.002463	405.721425978	5.62746359263	82.566772461	Less managed	175	-5.98627802042068	3.01248610618199	S
1988-06-22	0.000822	471.374211238	5.47957728918	64.306243896	Less managed	174	-7.04472113405529	2.99527189986095	S
1988-06-22	0.00148	403.665093443	14.5636308603	175.569000244	Less managed	174	-6.48248754357779	2.99527189986095	S
1988-06-22	0.000672	301.6768282	18.0825410581	224.550735474	Less managed	174	-7.23348541907145	2.99527189986095	S
1988-06-22	0.000526	456.811382233	11.5545090401	155.40423584	Less managed	174	-7.45940289726838	2.99527189986095	S
1988-06-23	0.004381	413.830991122	7.8754773509	122.000762939	Less managed	175	-5.41912998676478	3.01248610618199	S
1988-06-23	0.001886	419.884350136	9.36505840499	149.789001465	Less managed	175	-6.24713129012775	3.01248610618199	S
1988-06-23	0.0012	377.200907125	12.0749041918	140.390747071	Less managed	175	-6.68461172766793	3.01248610618199	S
1988-06-22	0.000709	443.112371839	6.92187722914	226.134490967	Less managed	174	-7.18350878056864	2.99527189986095	S
1988-06-23	0.000796	397.880386085	14.1297856925	140.261962891	Less managed	175	-7.07499119835805	3.01248610618199	S
1988-06-22	0.001313	440.612487793	8.10857018828	252.651245117	Less managed	174	-6.59806712626774	2.99527189986095	S
1988-06-21	0.00282	417.433393999	7.99958774177	41.535003662	Less managed	173	-5.85344324921061	2.97805769353991	S
1988-06-23	0.001041	390.79494734	9.59886074935	133.819213867	Less managed	175	-6.8206605721312	3.01248610618199	S
1988-06-22	0.001167	430.119595545	10.9965910619	168.523254395	Less managed	174	-6.71136646497675	2.99527189986095	S
1988-06-21	0.000728	408.313727185	9.68166416831	134.261016846	Less managed	173	-7.15878403378588	2.97805769353991	S
1988-06-22	0.001118	420.53823724	12.1668862641	249.140258789	Less managed	174	-6.7524623945761	2.99527189986095	S
1988-06-23	0.001344	424.004960802	7.76633583364	75.378997803	Less managed	175	-6.57557796664381	3.01248610618199	S
1988-06-25	0.001165	417.071808032	13.0132549721	184.62197876	Less managed	177	-6.71301120218963	3.04691451882407	S
1988-06-28	0.00114	398.294049485	15.9398235244	153.57824707	Less managed	180	-6.7338019718587	3.09855713778719	S
1988-06-28	0.00077	413.057405143	10.7330535546	162.454254151	Less managed	180	-7.10620621770598	3.09855713778719	S
1988-06-28	0.000969	388.555047642	9.8723669289	248.204284668	Less managed	180	-6.88893352474155	3.09855713778719	S
1988-06-28	0.000449	420.802338233	12.0517776517	53.734252929	Less managed	180	-7.60290446221276	3.09855713778719	S
1988-06-25	0.00089	450.926133052	7.57927284308	164.920501709	Less managed	177	-6.96963068270022	3.04691451882407	S
1988-06-25	0.002235	444.262292589	8.06400169681	131.977783203	Less managed	177	-6.08138925463597	3.04691451882407	S
1988-06-25	0.000486	338.92275781	13.2696893	118.680267334	Less managed	177	-7.53137639689347	3.04691451882407	S
1988-06-25	0.001028	304.159535703	7.44551729241	256.634994507	Impr. Grass	177	-6.83264780649533	3.04691451882407	S
1988-06-25	0.001079	380.5737559	11.845657182	104.367248535	Less managed	177	-6.78642299381461	3.04691451882407	S
1988-06-28	0.000584	250.610310708	3.4551015179	39.475997925	Impr. Grass	180	-7.36346160352705	3.09855713778719	S
1988-06-25	0.000869	418.116660415	9.21215596618	197.673034668	Less managed	177	-6.99222443560859	3.04691451882407	S
1988-06-25	0.001133	407.14128268	12.5027725502	128.134033203	Less managed	177	-6.73970169398589	3.04691451882407	S
1988-06-25	0.001333	380.100288494	12.9310365594	249.87600708	Less managed	177	-6.58350022629952	3.04691451882407	S
1988-06-28	0.001049	358.654847961	10.3264852637	138.736755371	Less managed	180	-6.81335460356065	3.09855713778719	S
1988-06-26	0.001008	358.335479622	11.1942738953	181.319519043	Impr. Grass	178	-6.85137494554603	3.06412872514511	S
1988-06-28	0.000955	328.547738075	14.3833185732	156.917755126	Less managed	180	-6.9027677374711	3.09855713778719	S
1988-06-25	0.001466	432.003477367	7.82382872554	135.145751953	Less managed	177	-6.49167999176196	3.04691451882407	S
1988-06-28	0.001208	299.760841192	8.03033328541	177.874221802	Impr. Grass	180	-6.67823212070389	3.09855713778719	S
1988-06-25	0.004468	287.501534672	9.00473821719	229.695236206	Less managed	177	-5.39968586093633	3.04691451882407	S
1988-06-26	0.000964	340.132389234	11.2912335072	107.625	Impr. Grass	178	-6.89385237381315	3.06412872514511	S
1988-06-28	0.001323	329.406007313	6.03070943838	73.779235839	Impr. Grass	180	-6.5907571521963	3.09855713778719	S
1988-06-28	0.001791	336.574719799	7.31740242729	99.989257812	Impr. Grass	180	-6.2974463767312	3.09855713778719	S
1988-06-25	0.00269	396.662212347	8.58724397664	156.256744385	Less managed	177	-5.89979735858216	3.04691451882407	S
1988-06-28	0.003318	354.414039249	7.72152851593	136.57901001	Less managed	180	-5.69343618260206	3.09855713778719	S
1988-06-26	0.002042	313.207780181	8.00814836825	297.517501832	Impr. Grass	178	-6.16963473277946	3.06412872514511	S
1988-06-28	0.008158	318.153007059	3.17421706612	56.008758545	Less managed	180	-4.80264599055372	3.09855713778719	S
1988-06-25	0.002078	524.70249176	5.67317261146	57.720489502	Less managed	177	-6.15257270750274	3.04691451882407	S
1988-06-24	0.002142	402.003311157	8.02961424222	56.70300293	Less managed	176	-6.12294090989637	3.02970031250303	S
1988-06-25	0.000873	539.637746635	3.91537168385	107.065490723	Less managed	177	-6.98788132346142	3.04691451882407	S
1988-06-25	0.000732	484.527142806	5.50808494464	108.883483887	Less managed	177	-7.15365581741896	3.04691451882407	S
1988-06-25	0.00096	489.32683595	7.57736251048	137.287231446	Less managed	177	-6.89780494812897	3.04691451882407	S
1988-06-24	0.000412	445.244750977	2.01093244553	0	Less managed	176	-7.67994566688253	3.02970031250303	S
1988-06-24	0.001169	408.33870697	5.16831701142	34.389495849	Less managed	176	-6.709724428483	3.02970031250303	S
1988-06-24	0.001365	393.885855222	7.54623943134	98.540222168	Less managed	176	-6.56062574788694	3.02970031250303	S
1988-06-23	0.001862	411.490706407	7.41765454992	73.530029297	Less managed	175	-6.25960546435293	3.01248610618199	S
1988-06-24	0.001987	387.637763977	4.68867820501	17.982513428	Less managed	176	-6.19627714173747	3.02970031250303	S
1988-06-24	0.003438	321.67913148	18.2040185263	241.723236084	Less managed	176	-5.6584267729354	3.02970031250303	S
1988-06-24	0.001003	350.500477559	8.62641081294	126.209014893	Less managed	176	-6.8561120458303	3.02970031250303	S
1988-06-25	0.002599	559.401506348	3.90196629326	64.8090820309999	Less managed	177	-5.9335730686922	3.04691451882407	S
1988-06-23	0.001043	426.757687737	8.04143729455	102.122528076	Less managed	175	-6.81882906978774	3.01248610618199	S
1988-06-25	0.000536	443.719213602	9.36555328162	132.127227783	Less managed	177	-7.44219076838726	3.04691451882407	S
1988-06-25	0.001872	522.669055854	7.1815686206	98.398468017	Less managed	177	-6.25438896843404	3.04691451882407	S
1988-06-24	0.000756	367.874097612	13.3165182802	194.109741211	Less managed	176	-7.12342681545765	3.02970031250303	S
1988-06-24	0.000668	384.983612615	9.97454446554	149.88973999	Less managed	176	-7.23904098891605	3.02970031250303	S
1988-06-24	0.000783	377.31269559	9.18966758342	112.967987061	Less managed	176	-7.09047691579743	3.02970031250303	S
1988-06-25	0.001104	565.226210884	5.52589223437	104.20928955	Less managed	177	-6.76452111089623	3.04691451882407	S
1988-06-25	0.001151	552.41192936	2.75848706236	45.30670166	Less managed	177	-6.72460073588429	3.04691451882407	S
1988-06-24	0.001094	401.932044241	5.80050752042	73.812988281	Less managed	176	-6.77322438602453	3.02970031250303	S
1988-06-25	0.001088	482.332837273	5.16671149675	120.007019043	Less managed	177	-6.778482943278	3.04691451882407	S
1988-06-25	0.001391	546.408582415	2.52868719612	12.3642578119999	Less managed	177	-6.54241796196475	3.04691451882407	S
1988-06-25	0.00184	450.461086426	7.20597741365	95.608001709	Less managed	177	-6.27117844991059	3.04691451882407	S
1988-06-25	0.000831	538.414462003	12.5961539854	91.396789551	Less managed	177	-7.03445293202809	3.04691451882407	S
1988-06-24	0.000692	386.484651532	13.6207296613	199.556976318	Less managed	176	-7.20616131479689	3.02970031250303	S
1988-06-25	0.002462	536.093927911	3.16102638401	50.5982055659999	Less managed	177	-5.98667603037618	3.04691451882407	S
1988-06-23	0.00162	448.037039172	4.49610675319	65.394500732	Less managed	175	-6.39493165255347	3.01248610618199	S
1988-06-25	0.001213	468.480792706	4.92129409834	73.213256836	Less managed	177	-6.67426543561378	3.04691451882407	S
1988-06-24	0.000445	397.530279688	6.73854994271	90.747741699	Less managed	176	-7.61095279539558	3.02970031250303	S
1988-06-25	0.000868	545.404584034	5.75921768776	90.088989258	Less managed	177	-6.99331316734378	3.04691451882407	S
1988-06-25	0.000251	515.889321093	6.20145276273	134.544769287	Less managed	177	-8.1084002932154	3.04691451882407	S
1988-06-28	0.001021	389.639259655	11.3970008291	255.594741821	Less managed	180	-6.83916248751653	3.09855713778719	S
1988-06-28	0.001175	381.256200518	13.3628063734	143.617736816	Less managed	180	-6.70481443498545	3.09855713778719	S
1988-06-29	0.001085	420	4	0	Less managed	181	-6.78112262804877	3.11577134410823	S
1988-06-28	0.004169	434.280178714	6.18530767692	75.355255127	Less managed	180	-5.46815714583994	3.09855713778719	S
1988-06-28	0.000759	463.26287614	8.32205643144	185.919036866	Less managed	180	-7.11971164090578	3.09855713778719	S
1988-06-26	0.001529	471.455143458	10.2892199504	177.668762207	Less managed	178	-6.45096354370863	3.06412872514511	S
1988-06-26	0.00624	480.575710462	5.91597103959	84.86026001	Less managed	178	-5.06879420826979	3.06412872514511	S
1988-06-28	0.000736	321.517661151	10.2405704698	130.54423523	Less managed	180	-7.14855376553507	3.09855713778719	S
1988-06-28	0.000528	485.722563068	8.09030380151	140.762268066	Less managed	180	-7.4559366892919	3.09855713778719	S
1988-06-28	0.000571	405.323619506	10.8060501222	232.411743164	Less managed	180	-7.3841794760308	3.09855713778719	S
1988-06-26	0.0013	481.23640201	9.01767774358	79.730773926	Less managed	178	-6.6076506865318	3.06412872514511	S
1988-06-29	0.001109	393.185396406	9.23648299111	176.526504517	Less managed	181	-6.76019771462452	3.11577134410823	S
1988-06-26	0.001213	472.216250436	9.39652079895	185.830474854	Less managed	178	-6.67426543561378	3.06412872514511	S
1988-06-29	0.000654	478.298510317	9.49883829222	153.327514648	Less managed	181	-7.25873220180623	3.11577134410823	S
1988-06-26	0.004339	485.252166829	8.04028151655	119.129730225	Less managed	178	-5.42865386827604	3.06412872514511	S
1988-06-29	0.001602	450.285095215	11.8926119989	139.948486328	Less managed	181	-6.40576860388335	3.11577134410823	S
1988-06-26	0.000838	460.179357392	8.51821056574	163.910003662	Less managed	178	-7.0265388149721	3.06412872514511	S
1988-06-29	0.000941	461.119693569	6.378312728	170.514465332	Less managed	181	-6.91679602363429	3.11577134410823	S
1988-06-30	0.003206	256.790234817	8.22521440606	94.053985596	Less managed	182	-5.72725583084184	3.13298555042927	S
1988-06-28	0.000804	414.644601949	11.6276675284	145.265014648	Less managed	180	-7.0655793641757	3.09855713778719	S
1988-06-29	0.001014	434.01583252	9.74929782347	175.555999756	Less managed	181	-6.84571988806268	3.11577134410823	S
1988-06-28	0.001471	376.626256983	13.1312077621	161.189239502	Less managed	180	-6.48838726570498	3.09855713778719	S
1988-06-28	0.001239	256.142025602	5.10290519202	53.235488892	Less managed	180	-6.65388855502509	3.09855713778719	S
1988-06-28	0.000407	470.743651309	8.04681813843	94.605255127	Less managed	180	-7.69082716707007	3.09855713778719	S
1988-06-29	0.000698	432.064872048	6.04925700751	51.57800293	Less managed	181	-7.1981075799898	3.11577134410823	S
1988-06-28	0.002299	291.843678054	11.1672554408	241.346740723	Less managed	180	-6.05376557330536	3.09855713778719	S
1988-06-29	0.000688	344.446187943	10.0288758831	177.707489014	Less managed	181	-7.2115667333638	3.11577134410823	S
1988-06-29	0.000981	445.18629471	10.0320583045	242.069519043	Less managed	181	-6.87722607394731	3.11577134410823	S
1988-06-29	0.000817	299.760110294	20.0614898836	205.440505982	Less managed	181	-7.05047158118373	3.11577134410823	S
1988-06-29	0.001082	432.770905208	11.2284818399	243.030014038	Less managed	181	-6.78376929920115	3.11577134410823	S
1988-06-29	0.00142	449.441815106	11.7196990939	227.806976318	Less managed	181	-6.52249287819149	3.11577134410823	S
1988-06-29	0.001235	281.287164828	16.4779419725	212.551010131	Less managed	181	-6.65699656063495	3.11577134410823	S
1988-06-28	0.001567	324.963076274	11.2393093904	90.807983398	Impr. Grass	180	-6.42718269838717	3.09855713778719	S
1988-06-29	0.00643	408.479407722	4.78626339258	78.734741211	Less managed	181	-5.03903476861795	3.11577134410823	S
1988-06-28	0.00218	299.194622413	9.10016424943	118.57925415	Impr. Grass	180	-6.10575369351011	3.09855713778719	S
1988-06-28	0.001117	302.0051474	8.85560343051	149.775756836	Impr. Grass	180	-6.75331892567772	3.09855713778719	S
1988-06-29	0.002415	340.529354277	12.5423117757	262.035491943	Less managed	181	-6.00556347148748	3.11577134410823	S
1988-06-28	0.000408	315.807092272	14.0601383307	309.173248291	Less managed	180	-7.68864137385009	3.09855713778719	S
1988-06-26	0.002293	492.571072118	7.06592645775	143.358703613	Less managed	178	-6.05632311945648	3.06412872514511	S
1988-06-30	0.002265	206.092803636	6.32261127967	131.402236938	Impr. Grass	182	-6.06834559144394	3.13298555042927	S
1988-07-01	0.001993	292.434810331	9.37162203089	291.181015014	Impr. Grass	183	-6.19333596314665	3.15019975675031	S
1988-07-01	0.000561	350.055714711	13.6860420223	257.398254395	Less managed	183	-7.40041359879268	3.15019975675031	S
1988-07-01	0.000819	331.65659988	12.0292127068	251.235748291	Impr. Grass	183	-7.04816743269888	3.15019975675031	S
1988-07-01	0.00077	331.803683182	8.75583223488	236.194229126	Less managed	183	-7.10620621770598	3.15019975675031	S
1988-07-01	0.001289	258.586028003	7.73229115212	295.310745239	Impr. Grass	183	-6.6158322122731	3.15019975675031	S
1988-07-01	0.001231	369.018381322	14.4669811244	161.945251464	Less managed	183	-6.66011425606754	3.15019975675031	S
1988-07-01	0.001334	345.061771516	10.5857521642	136.880981445	Less managed	183	-6.58277742178666	3.15019975675031	S
1988-06-29	0.004453	392.923107372	10.6930914136	146.281494141	Less managed	181	-5.4030114376627	3.11577134410823	S
1988-06-30	0.003758	200.875372887	7.57062971592	22.242507935	Impr. Grass	182	-5.57065116205302	3.13298555042927	S
1988-06-30	0.000707	228.216060923	13.9907509533	229.848747253	Impr. Grass	182	-7.18614730452683	3.13298555042927	S
1988-07-01	0.00149	343.820983177	12.2825767384	156.798507691	Less managed	183	-6.4759728625566	3.15019975675031	S
1988-06-29	0.000834	299.829926794	20.0335042449	213.315002441	Less managed	181	-7.03105349532663	3.11577134410823	S
1988-06-30	0.001073	204.461887572	7.11239637352	118.477981568	Impr. Grass	182	-6.79175160322583	3.13298555042927	S
1988-07-01	0.001234	280.966615465	11.2365541966	224.128753662	Less managed	183	-6.65777507371437	3.15019975675031	S
1988-06-30	0.00267	140.001616913	5.40283586627	128.1152420047	Impr. Grass	182	-5.90712339867423	3.13298555042927	S
1988-06-30	0.004672	183.292989173	5.31971588502	61.399017333	Impr. Grass	182	-5.35552284031882	3.13298555042927	S
1988-06-30	0.001195	241.406741291	9.55526511077	136.776260376	Impr. Grass	182	-6.68861974906547	3.13298555042927	S
1988-06-30	0.000902	208.237963586	9.22400463322	230.127746582	Impr. Grass	182	-6.95694552317291	3.13298555042927	S
1988-07-01	0.001714	275.987703498	8.4407205617	283.980499267	Impr. Grass	183	-6.34017132139754	3.15019975675031	S
1988-06-30	0.001304	220.841662259	8.39865161048	152.624008179	Impr. Grass	182	-6.60469210449205	3.13298555042927	S
1988-06-30	0.001353	207.752738727	11.740136447	142.600509643	Impr. Grass	182	-6.56914247786181	3.13298555042927	S
1988-07-01	0.000334	371.542385171	13.2257941146	219.975234985	Less managed	183	-7.86486800537655	3.15019975675031	S
1988-06-30	0.002404	181.297263237	7.71656483536	93.528991699	Impr. Grass	182	-6.01003593269342	3.13298555042927	S
1988-07-01	0.001076	250.351768748	8.5588430196	195.71875	Impr. Grass	183	-6.78908374926464	3.15019975675031	S
1988-07-01	0.001369	343.62427941	17.8825191908	263.973510742	Less managed	183	-6.55780288080423	3.15019975675031	S
1988-06-30	0.003529	145.402152236	5.85933291367	111.150489807	Impr. Grass	182	-5.63267184719825	3.13298555042927	S
1988-06-29	0.000752	358.424139023	15.2802508988	168.817260742	Less managed	181	-7.12840195009776	3.11577134410823	S
1988-06-30	0.001107	279.448790272	7.30336998056	305.808731079	Impr. Grass	182	-6.7619248307706	3.13298555042927	S
1988-06-30	0.002082	349.010266491	14.4142178523	253.278503418	Less managed	182	-6.15069477267854	3.13298555042927	S
1988-06-30	0.000794	254.491869609	8.80731735627	118.958755493	Less managed	182	-7.07735806336832	3.13298555042927	S
1988-07-06	0.000965	331.121036252	6.93918132065	181.276519776	Less managed	188	-6.89286666648839	3.23627078835551	S
1988-07-06	0.000818	307.330727835	6.66710421555	286.051269532	Impr. Grass	188	-7.04931884330392	3.23627078835551	S
1988-07-07	0.0016	339.297400916	8.01300285575	286.945022583	Impr. Grass	189	-6.40697999106965	3.25348499467655	S
1988-07-06	0.001439	208.753490189	3.72846626165	83.200500488	Impr. Grass	188	-6.50965052528027	3.23627078835551	S
1988-07-07	0.001984	300.739282999	8.41618894461	174.729492187	Impr. Grass	189	-6.19775098135577	3.25348499467655	S
1988-07-06	0.001433	210.128308879	4.00643794692	109.63949585	Arable	188	-6.51368821582634	3.23627078835551	S
1988-07-05	0.001172	426.401444698	7.49249791786	278.780975342	Less managed	187	-6.70726641823273	3.21905658203447	S
1988-07-06	0.000785	426.340590761	9.48090841654	187.48022461	Less managed	188	-7.08807883311342	3.23627078835551	S
1988-07-06	0.002945	339.624000603	6.49817532171	113.508972168	Less managed	188	-5.81081104741472	3.23627078835551	S
1988-07-07	0.002462	359.464186724	8.04976613498	109.194000244	Impr. Grass	189	-5.98667603037618	3.25348499467655	S
1988-07-06	0.001262	354.056032497	10.4178822184	307.254486084	Less managed	188	-6.63620258846024	3.23627078835551	S
1988-07-07	0.002063	276.804320427	6.96573927982	128.047241211	Less managed	189	-6.15964654034822	3.25348499467655	S
1988-07-07	0.001253	307.892422849	7.76058472885	180.75050354	Impr. Grass	189	-6.64308598083943	3.25348499467655	S
1988-07-05	0.001314	446.595039731	6.00222659409	223.95098877	Less managed	187	-6.59733371956087	3.21905658203447	S
1988-07-06	0.000862	314.818798814	9.14119028112	350.369995117	Less managed	188	-6.99987056788994	3.23627078835551	S
1988-07-07	0.002808	378.628861553	6.95537315245	81.503997803	Impr. Grass	189	-5.85763319947446	3.25348499467655	S
1988-07-06	0.000542	276.545502898	7.51109727061	211.174743653	Impr. Grass	188	-7.43200392308027	3.23627078835551	S
1988-07-07	0.001057	311.307960492	6.60696020254	183.220504761	Impr. Grass	189	-6.80610162525564	3.25348499467655	S
1988-07-07	0.000742	296.788102593	8.76584539622	143.879257202	Impr. Grass	189	-7.14094916614985	3.25348499467655	S
1988-07-06	0.00188	211.334994493	4.08970941926	195.911987305	Impr. Grass	188	-6.25023527606534	3.23627078835551	S
1988-07-07	0.001115	309.583597593	8.20119419271	177.598022461	Impr. Grass	189	-6.75503419196447	3.25348499467655	S
1988-07-07	0.00172	336.948146632	9.34175133705	104.962249755	Impr. Grass	189	-6.3367757323964	3.25348499467655	S
1988-07-06	0.000859	259.653031569	6.74267910964	231.587509155	Impr. Grass	188	-7.0031654637868	3.23627078835551	S
1988-07-07	0.000823	386.753718243	13.4482296713	302.571487427	Less managed	189	-7.04357500212467	3.25348499467655	S
1988-07-06	0.000871	284.484326956	7.97905754766	177.49899292	Less managed	188	-6.99005052170897	3.23627078835551	S
1988-07-07	0.001696	376.28996147	8.56606762523	145.120758056	Impr. Grass	189	-6.35042782156473	3.25348499467655	S
1988-07-06	0.004329	178.451594652	3.9758557262	64.039001465	Impr. Grass	188	-5.43093489116288	3.23627078835551	S
1988-07-06	0.001488	189.915459318	4.0972352276	71.87399292	Impr. Grass	188	-6.47727240789868	3.23627078835551	S
1988-07-06	0.001129	226.920622606	3.13001584816	30.067001343	Impr. Grass	188	-6.7430886574269	3.23627078835551	S
1988-07-05	0.00069	315.597432868	11.9594952533	132.609237671	Impr. Grass	187	-7.20886037176606	3.21905658203447	S
1988-07-07	0.001351	295.731146447	8.56339436288	184.419754028	Impr. Grass	189	-6.57056901162727	3.25348499467655	S
1988-07-06	0.000751	476.138305172	8.03767928	128.333496093	Less managed	188	-7.12964961089591	3.23627078835551	S
1988-07-05	0.002097	341.728157085	11.0126411215	176.885009765	Less managed	187	-6.14368376008549	3.21905658203447	S
1988-07-07	0.000943	344.367480848	10.7738501826	226.692489624	Less managed	189	-6.9147798939191	3.25348499467655	S
1988-07-06	0.001293	218.924043746	7.08450176389	182.154510498	Impr. Grass	188	-6.61284936144104	3.23627078835551	S
1988-07-06	0.000614	215	2	0	Less managed	188	-7.31722840848784	3.23627078835551	S
1988-07-05	0.001174	540.834765929	6.28774977101	155.087005615	Less managed	187	-6.705631094892	3.21905658203447	S
1988-07-05	0.00151	219.414823783	5.9942579787	158.081504822	Impr. Grass	187	-6.46306945772069	3.21905658203447	S
1988-07-06	0.003281	164.595115484	3.19571888219	90.016998291	Impr. Grass	188	-5.70448271977059	3.23627078835551	S
1988-07-06	0.008289	116.326162457	5.26350828779	121.4940109248	Impr. Grass	188	-4.78681197387729	3.23627078835551	S
1988-07-05	0.001546	261.404652966	8.44111021636	104.817016601	Impr. Grass	187	-6.44025477995452	3.21905658203447	S
1988-07-05	0.001463	166.482265717	7.95389174614	174.808502197	Impr. Grass	187	-6.49366084417592	3.21905658203447	S
1988-07-05	0.003198	181.614893807	6.08137993735	93.068252564	Impr. Grass	187	-5.72971585668271	3.21905658203447	S
1988-07-06	0.001021	143.511261042	3.35682410462	65.290252686	Impr. Grass	188	-6.83916248751653	3.23627078835551	S
1988-07-05	0.001198	198.827271137	9.39866663254	139.508499146	Impr. Grass	187	-6.6862130090349	3.21905658203447	S
1988-07-06	0.002441	171.649536133	2.85007246917	21.932235718	Impr. Grass	188	-5.99507104270209	3.23627078835551	S
1988-07-05	0.001055	201.224328159	7.53620592994	140.623504638	Impr. Grass	187	-6.80790994401242	3.21905658203447	S
1988-07-05	0.001528	237.358333333	3.85838940607	93.086730957	Impr. Grass	187	-6.45159705655845	3.21905658203447	S
1988-07-06	0.001189	135.609718591	3.56186871433	77.894500733	Impr. Grass	188	-6.69345067633513	3.23627078835551	S
1988-07-06	0.008857	120.996206829	6.85572984997	146.976753235	Impr. Grass	188	-4.7209177945324	3.23627078835551	S
1988-07-06	0.002863	149.974996543	4.13297757748	72.933250427	Impr. Grass	188	-5.83857180100484	3.23627078835551	S
1988-07-05	0.004473	186.719212092	8.65813388729	123.355239868	Impr. Grass	187	-5.39857978848643	3.21905658203447	S
1988-07-05	0.000674	268.227696879	4.53112242251	77.449020385	Impr. Grass	187	-7.23071916557856	3.21905658203447	S
1988-07-05	0.00134	222.585878324	6.87911309339	141.595733642	Impr. Grass	187	-6.57845153183954	3.21905658203447	S
1988-07-05	0.001308	235.489427171	5.8202632202	149.19998169	Impr. Grass	187	-6.60174224984563	3.21905658203447	S
1988-07-06	0.001047	130.08285332	4.87935898608	126.6419944758	Impr. Grass	188	-6.81517609768904	3.23627078835551	S
1988-07-06	0.001601	162.702643292	4.6488212982	123.631500244	Impr. Grass	188	-6.40637411404415	3.23627078835551	S
1988-07-06	0.002182	152.479974242	2.25516902574	103.450744629	Impr. Grass	188	-6.10485723446307	3.23627078835551	S
1988-07-06	0.001002	89.3875078092	4.84064352712	81.1002502437	Impr. Grass	188	-6.85706216466662	3.23627078835551	S
1988-07-05	0.001357	256.468759146	6.78023056211	139.750244141	Impr. Grass	187	-6.56629550084989	3.21905658203447	S
1988-07-05	0.000964	200.318003805	6.93551272104	126.376747132	Impr. Grass	187	-6.89385237381315	3.21905658203447	S
1988-07-07	0.000893	324.670192436	8.22466526731	213.290008545	Impr. Grass	189	-6.96644427533082	3.25348499467655	S
1988-07-08	0.001741	202.347685839	3.38342532689	98.870498657	Impr. Grass	190	-6.32498115590356	3.27069920099759	S
1988-07-06	0.002045	32.8206582387	1.81181794405	9.3409996032	Impr. Grass	188	-6.16820172560804	3.23627078835551	S
1988-07-07	0.003199	139.141775561	3.55929554054	74.0555038448	Impr. Grass	189	-5.72940802229517	3.25348499467655	S
1988-07-08	0.011733	118.793427101	7.83728743333	90.3659973147	Impr. Grass	190	-4.44109746425093	3.27069920099759	S
1988-07-06	0.001179	145.247576506	2.98061970395	23.667739868	Impr. Grass	188	-6.70155444839824	3.23627078835551	S
1988-07-06	0.001465	163.300656952	5.97994232232	128.465003967	Impr. Grass	188	-6.4923398400208	3.23627078835551	S
1988-07-08	0.001895	183.341197121	4.20029580216	84.417236328	Impr. Grass	190	-6.24249330191173	3.27069920099759	S
1988-07-09	0.001635	177.509154707	5.68823840531	214.9722595213	Impr. Grass	191	-6.38598971517781	3.28791340731863	S
1988-07-08	0.001052	214.872069891	4.9410320981	140.039749146	Impr. Grass	190	-6.81062856825141	3.27069920099759	S
1988-07-08	0.000914	233.998685988	2.94671133528	57.057998657	Impr. Grass	190	-6.94441926335373	3.27069920099759	S
1988-07-08	0.00137	133.625337137	6.69611943896	126.2927627562	Impr. Grass	190	-6.55709840736897	3.27069920099759	S
1988-07-06	0.001164	157.275615581	4.16288016421	156.7990036014	Impr. Grass	188	-6.71383458634483	3.23627078835551	S
1988-07-06	0.001614	90.6918090268	4.67039971573	79.8129997249	Impr. Grass	188	-6.39853093658312	3.23627078835551	S
1988-07-08	0.00143	171.246612301	2.80538834201	55.924255371	Impr. Grass	190	-6.51571319120611	3.27069920099759	S
1988-07-07	0.000603	140.387950406	3.6976516053	75.8902587888	Impr. Grass	189	-7.33393342868784	3.25348499467655	S
1988-07-08	0.005148	95.796798537	6.43859868311	105.6042518612	Impr. Grass	190	-5.25948134276284	3.27069920099759	S
1988-07-06	0.000865	143.424864758	4.70650767732	69.419250488	Impr. Grass	188	-6.99658649268875	3.23627078835551	S
1988-07-08	0.001102	237.524749756	1.9119844834	27.437744141	Impr. Grass	190	-6.76625571670844	3.27069920099759	S
1988-07-09	0.002418	132.361003636	6.70824448879	98.7024917606	Impr. Grass	191	-6.004347172939	3.28791340731863	S
1988-07-07	0.003965	148.229984223	2.90588016413	58.923492432	Impr. Grass	189	-5.51771793158341	3.25348499467655	S
1988-07-09	0.001248	114.649778846	6.70571316343	101.468997955	Impr. Grass	191	-6.64693066070024	3.28791340731863	S
1988-07-06	0.002761	93.187814327	3.91709552574	140.6347389222	Impr. Grass	188	-5.87421498705774	3.23627078835551	S
1988-07-09	0.000982	125.200538368	5.33622101315	155.7750015256	Impr. Grass	191	-6.87625661192277	3.28791340731863	S
1988-07-09	0.001354	132.361003636	6.70824448879	98.7024917606	Impr. Grass	191	-6.56842997337852	3.28791340731863	S
1988-07-09	0.000885	149.80627542	4.68012817773	164.8245010376	Impr. Grass	191	-6.97496402867559	3.28791340731863	S
1988-07-09	0.000554	196.431756359	8.00879194446	274.3129844664	Impr. Grass	191	-7.41193636002946	3.28791340731863	S
1988-07-09	0.000688	148.702120399	5.89642851856	149.5487518312	Impr. Grass	191	-7.2115667333638	3.28791340731863	S
1988-07-08	0.000733	160.922554393	6.35829081075	129.1102600096	Impr. Grass	190	-7.15237786197347	3.27069920099759	S
1988-07-09	0.00083	164.963497664	5.52396490236	212.1209869385	Impr. Grass	191	-7.03558865049202	3.28791340731863	S
1988-07-09	0.001041	176.49377318	2.92213731611	73.302246094	Impr. Grass	191	-6.8206605721312	3.28791340731863	S
1988-07-09	0.000884	152.098037502	7.76738080297	102.056259156	Impr. Grass	191	-6.97603411973543	3.28791340731863	S
1988-07-08	0.001498	182.859415618	6.62560397079	101.333000184	Impr. Grass	190	-6.4707915038146	3.27069920099759	S
1988-07-08	0.00127	146.092849521	7.34765853162	114.0807495121	Impr. Grass	190	-6.63012354238386	3.27069920099759	S
1988-07-09	0.003954	222.586417759	8.4385492284	119.398986817	Impr. Grass	191	-5.52046141752916	3.28791340731863	S
1988-07-09	0.001652	196.087854113	6.08825000854	133.965255738	Impr. Grass	191	-6.37595124883095	3.28791340731863	S
1988-07-09	0.000797	146.705126957	5.23236141185	141.6477508545	Impr. Grass	191	-7.07380986331222	3.28791340731863	S
1988-07-09	0.001584	191.583016354	4.23578238852	58.635986328	Impr. Grass	191	-6.41672428254433	3.28791340731863	S
1988-07-09	0.001038	211.756694097	6.87978588466	274.914253235	Impr. Grass	191	-6.82341413054839	3.28791340731863	S
1988-07-09	0.001809	138.148785822	3.1083551204	79.6360015872	Impr. Grass	191	-6.28771657024283	3.28791340731863	S
1988-07-09	0.000853	145.85918885	5.36522754224	153.5269966125	Impr. Grass	191	-7.00978800454729	3.28791340731863	S
1988-07-16	0.00255	297.803124372	5.24094349321	57.277252198	Impr. Grass	198	-5.9522438339547	3.40841285156591	S
1988-07-16	0.005479	433.817261751	6.79121694129	126.794494629	Less managed	198	-5.19774831162634	3.40841285156591	S
1988-07-16	0.002095	191.220386634	4.06135103408	60.817001343	Impr. Grass	198	-6.14461572660216	3.40841285156591	S
1988-07-16	0.00669	454.428474665	8.28789335256	142.94921875	Less managed	198	-4.99969535405792	3.40841285156591	S
1988-07-19	0.005393	181.238006679	3.61364794704	104.471496582	Impr. Grass	201	-5.21342489953007	3.46005547052903	S
1988-07-19	0.001534	219.529157814	3.93693180116	77.751998901	Impr. Grass	201	-6.4478019855899	3.46005547052903	S
1988-07-22	0.002097	23.6325204471	1.04024352741	35.5321102143	Arable	204	-6.14368376008549	3.51169808949215	S
1988-07-22	0.005836	20.1635710755	1.02453518355	27.9886608124	Arable	204	-5.13517862917086	3.51169808949215	S
1988-07-22	0.001289	27.8258359393	1.52260599519	35.4449977875	Arable	204	-6.6158322122731	3.51169808949215	S
1988-07-28	0.000747	355.171009488	4.28632149928	91.01651001	Less managed	210	-7.13465587917406	3.61498332741839	S
1988-07-29	0.000901	400.311848417	7.91399084148	116.604736329	Less managed	211	-6.95799649541888	3.63219753373943	S
1988-07-29	0.000959	334.01155559	7.89496208546	171.596496582	Less managed	211	-6.89879553761067	3.63219753373943	S
1988-07-29	0.000808	401.843152954	8.91463080645	241.35446167	Less managed	211	-7.06090645847631	3.63219753373943	S
1988-07-28	0.001535	229.920165561	2.86486105026	84.543258667	Arable	210	-6.44717087165289	3.61498332741839	S
1988-07-29	0.002852	313.389149541	8.13342544796	172.441497802	Less managed	211	-5.84235512452014	3.63219753373943	S
1988-07-29	0.00099	429.756008356	11.3454812471	175.634490966	Less managed	211	-6.86853456582886	3.63219753373943	S
1988-07-29	0.001221	400.009516158	9.86334037548	229.519744873	Less managed	211	-6.66795128677482	3.63219753373943	S
1988-07-28	0.000273	421.11970812	8.20682163779	233.255493164	Less managed	210	-8.03785823474162	3.61498332741839	S
1988-07-28	0.000957	323.239942638	7.35223190774	213.967514038	Less managed	210	-6.90077966524571	3.61498332741839	S
1988-07-29	0.000966	448.098302088	8.81906075435	170.131469726	Less managed	211	-6.89188192982585	3.63219753373943	S
1988-07-30	0.004472	141.639692459	2.28321286413	38.258499146	Arable	212	-5.39880090512636	3.64941174006047	S
1988-07-29	0.008774	376.101588475	5.90351895856	129.230255127	Less managed	211	-4.73027999703094	3.63219753373943	S
1988-07-29	0.001353	318.371051906	6.80595343475	108.048522949	Less managed	211	-6.56914247786181	3.63219753373943	S
1988-07-28	0.001437	239.508392334	5.06860687052	44.062988282	Arable	210	-6.51099461150412	3.61498332741839	S
1988-07-29	0.001664	335.912348009	5.48975187495	113.694763183	Impr. Grass	211	-6.36892545880655	3.63219753373943	S
1988-07-29	0.001456	303.833927388	5.16892307825	189.782257081	Impr. Grass	211	-6.49829814960444	3.63219753373943	S
1988-07-27	0.001261	433.775743781	7.83884829671	179.903503418	Less managed	209	-6.63696507420057	3.59776912109735	S
1988-07-29	0.001155	438.599919965	12.2885801811	158.746734619	Less managed	211	-6.72127571203952	3.63219753373943	S
1988-07-29	0.00092	388.756153561	8.56624986895	142.414489746	Less managed	211	-6.93821448646685	3.63219753373943	S
1988-07-29	0.004989	393.075900487	6.54025368712	111.043029785	Less managed	211	-5.29054762928368	3.63219753373943	S
1988-07-30	0.001897	130.445234885	4.71398468111	206.4424972537	Arable	212	-6.24146555259207	3.64941174006047	S
1988-07-28	0.000645	318.449522257	5.15911956488	168.916259765	Impr. Grass	210	-7.27159871239948	3.61498332741839	S
1988-07-30	0.00421	134.167812737	4.36718608572	211.8435134887	Arable	212	-5.45848611870086	3.64941174006047	S
1988-07-29	0.00116	354.941572462	5.5588661262	113.325744629	Less managed	211	-6.71713491937349	3.63219753373943	S
1988-07-29	0.000893	398.29612534	9.6457566076	177.155517578	Less managed	211	-6.96644427533082	3.63219753373943	S
1988-07-23	0.002351	92.5217224241	5.04721294625	395.8743972782	Suburban	205	-6.03186996174302	3.52891229581319	S
1988-07-24	0.00307	21.9285476685	0.610914313793	1.2708530426	Arable	206	-5.76992227716075	3.54612650213423	S
1988-07-23	0.002064	31.7913158962	0.973669668152	23.9996128082	Impr. Grass	205	-6.15917339153409	3.52891229581319	S
1988-07-22	0.00342	32.8901975924	1.53040652871	46.8698530197	Arable	204	-5.66360068502337	3.51169808949215	S
1988-07-23	0.002256	53.3688586921	2.72148340171	355.9999790196	Suburban	205	-6.07224085713527	3.52891229581319	S
1988-07-24	0.00337	140	3.5	0	Arable	206	-5.67811472790762	3.54612650213423	S
1988-07-23	0.002277	52.7209914433	2.54852808356	351.9072532658	Suburban	205	-6.06317539466198	3.52891229581319	S
1988-07-24	0.005153	46.4419473171	2.50168855404	28.73695755	Arable	206	-5.25851989667397	3.54612650213423	S
1988-07-30	0.001913	219.570744627	3.92513172526	146.387741089	Arable	212	-6.23328136368781	3.64941174006047	S
1988-07-30	0.002302	228.547201104	4.02251418242	114.458480835	Impr. Grass	212	-6.05248924894576	3.64941174006047	S
1988-07-30	0.002054	126.426750183	3.24114823341	0	Arable	212	-6.16391498410667	3.64941174006047	S
1988-07-30	0.001371	224.279341777	4.36092839297	109.693740845	Arable	212	-6.55639442986717	3.64941174006047	S
1988-07-30	0.00691	161.505973932	2.3193185628	118.964004516	Arable	212	-4.96757580463581	3.64941174006047	S
1988-07-30	0.003213	161.353400302	3.11015882897	192.5589904782	Arable	212	-5.72510826137095	3.64941174006047	S
1988-07-30	0.003251	147.227880263	2.39495104787	176.7217407223	Arable	212	-5.71352982611108	3.64941174006047	S
1988-07-30	0.001785	122.175547215	2.76374079651	66.3399887082	Arable	212	-6.3007107974756	3.64941174006047	S
1988-07-30	0.004228	142.632956977	2.20358781436	179.5257568357	Arable	212	-5.45426966832192	3.64941174006047	S
1988-07-31	0.001598	190.953868025	6.30282466025	178.9160003658	Arable	213	-6.40819284749486	3.66662594638151	S
1988-07-30	0.002883	172.212489742	2.37528157526	142.085998535	Arable	212	-5.83172948898682	3.64941174006047	S
1988-07-24	0.002294	46.3311751229	3.1178160429	30.904296875	Arable	206	-6.05589640726737	3.54612650213423	S
1988-07-24	0.006637	26.8693834452	1.27405725267	26.55581855779	Arable	206	-5.0075899359103	3.54612650213423	S
1988-07-24	0.002122	58.0134020244	3.86618198352	59.2810020446	Arable	206	-6.13210687691045	3.54612650213423	S
1988-08-05	0.004341	66.3855317208	0.705870112981	12.5222511291	Arable	218	-5.42819828740256	3.75269697798671	S
1988-08-05	0.001151	243.692315208	6.3566021536	216.029495239	Impr. Grass	218	-6.72460073588429	3.75269697798671	S
1988-08-05	0.00168	297.901670969	5.82334018949	241.45576477	Impr. Grass	218	-6.35963387047245	3.75269697798671	S
1988-08-04	0.000682	461.367769321	13.5698676776	455.513244628	Less managed	217	-7.21973004400296	3.73548277166567	S
1988-08-05	0.011606	303.693963801	8.30704481119	231.290512085	Less managed	218	-4.45193421008923	3.75269697798671	S
1988-08-04	0.000862	370.661462514	8.44332270979	385.031265259	Less managed	217	-6.99987056788994	3.73548277166567	S
1988-08-04	0.002499	367.671064801	5.28216479574	146.601013184	Less managed	217	-5.97205415358816	3.73548277166567	S
1988-08-06	0.000717	686.276733398	0.0901824757457	0	Less managed	219	-7.17302375659702	3.76991118430775	S
1988-08-05	0.001283	321.863027922	5.71876558857	157.574752808	Impr. Grass	218	-6.62032323778557	3.75269697798671	S
1988-08-05	0.001973	258.262030577	8.20696054145	213.344238281	Arable	218	-6.20317372079653	3.75269697798671	S
1988-08-05	0.001413	205.221467956	5.87175950109	233.830245972	Arable	218	-6.52726615694415	3.75269697798671	S
1988-07-28	0.001649	24.5576141221	0.572360854995	14.504989624	Arable	210	-6.37771543629234	3.61498332741839	S
1988-07-28	0.00225	30.470759288	1.65934499905	36.0096740722	Arable	210	-6.07484615604703	3.61498332741839	S
1988-07-28	0.001845	79.350897842	4.9342422886	210.0153427126	Arable	210	-6.26853644044775	3.61498332741839	S
1988-07-28	0.000952	15.2181768652	0.796707166967	16.1777887344	Arable	210	-6.90575727631946	3.61498332741839	S
1988-08-06	0.00157	404.213495957	7.43618203758	145.539245605	Less managed	219	-6.42532912973784	3.76991118430775	S
1988-08-06	0.000865	374.33581533	8.83185208853	204.23550415	Impr. Grass	219	-6.99658649268875	3.76991118430775	S
1988-08-06	0.000711	479.270355461	11.4797973598	396.876739502	Less managed	219	-7.18087720010259	3.76991118430775	S
1988-08-06	0.000837	576.981118338	12.9298549985	305.356994629	Less managed	219	-7.02766557565469	3.76991118430775	S
1988-08-06	0.00105	609.288986206	13.858352979	289.95123291	Less managed	219	-6.81244509917781	3.76991118430775	S
1988-08-06	0.000797	531.531453375	13.4559989118	257.000030518	Less managed	219	-7.07380986331222	3.76991118430775	S
1988-08-06	0.000906	415.771686554	12.79636693	36.023254395	Less managed	219	-6.95275264491287	3.76991118430775	S
1988-08-06	0.001609	467.4702628	10.8394747496	226.409240723	Less managed	219	-6.40154026777383	3.76991118430775	S
1988-08-06	0.000512	586.945967479	14.2613964696	196.345703125	Less managed	219	-7.48400870807058	3.76991118430775	S
1988-08-06	0.008474	383.771018846	6.47008510825	125.123504639	Less managed	219	-4.76486956474577	3.76991118430775	S
1988-08-06	0.000769	408.954505748	9.3898121167	444.636276245	Less managed	219	-7.1074264741112	3.76991118430775	S
1988-08-06	0.000981	416.08916012	7.29744150312	164.363739014	Less managed	219	-6.87722607394731	3.76991118430775	S
1988-08-06	0.000607	591.476414185	17.9347312675	277.903228759	Less managed	219	-7.32782653947966	3.76991118430775	S
1988-07-29	0.001373	174.734276383	7.0970021008	197.809867859	Impr. Grass	211	-6.55498795987442	3.63219753373943	S
1988-07-29	0.002589	108.328568357	4.2076412127	146.8666534419	Arable	211	-5.93735522146095	3.63219753373943	S
1988-07-30	0.001843	133.666753153	10.3137224587	216.8917617794	Less managed	212	-6.26959240675495	3.64941174006047	S
1988-07-29	0.001826	193.791428988	9.7905118116	242.282722474	Impr. Grass	211	-6.2786134283981	3.63219753373943	S
1988-07-29	0.003363	129.59411941	6.28450544422	152.4832916257	Arable	211	-5.68016360905757	3.63219753373943	S
1988-07-28	0.002805	77.3952088911	4.10583682567	312.5970802306	Arable	210	-5.85868343587416	3.61498332741839	S
1988-07-29	0.001205	219.029436575	11.7791903007	216.875610352	Arable	211	-6.68061970639839	3.63219753373943	S
1988-07-29	0.004393	90.6928510368	2.51891067529	45.9464645384	Arable	211	-5.41642545502837	3.63219753373943	S
1988-07-29	0.002006	202.753745889	9.13248720551	299.797821045	Impr. Grass	211	-6.18699293138922	3.63219753373943	S
1988-07-28	0.002505	30.9808503301	0.880810720995	20.1657981872	Arable	210	-5.96970305532647	3.61498332741839	S
1988-07-28	0.002669	104.963266059	5.83772536009	393.0718650821	Suburban	210	-5.9074911133318	3.61498332741839	S
1988-07-30	0.002718	32.9387900193	1.65443357913	24.0971221924	Arable	212	-5.88963024122671	3.64941174006047	S
1988-07-29	0.00245	97.1075740284	5.81571381965	141.1610565181	Arable	211	-5.99146454710798	3.63219753373943	S
1988-07-29	0.003018	189.126818666	8.76578699345	208.003013611	Less managed	211	-5.78672939547713	3.63219753373943	S
1988-07-29	0.005675	100.882818704	2.60223070821	135.8759002684	Arable	211	-5.16291272954183	3.63219753373943	S
1988-07-29	0.004003	144.598977078	5.61946002299	225.1889190677	Arable	211	-5.50829793133597	3.63219753373943	S
1988-07-29	0.001782	77.8004925885	4.95111035999	67.8980026241	Arable	211	-6.3023470127302	3.63219753373943	S
1988-07-29	0.001697	118.328404839	9.1123119139	97.2042160033	Arable	211	-6.34985524783022	3.63219753373943	S
1988-07-30	0.004503	29.9341746882	1.28778798859	14.5239810944	Arable	212	-5.39196892262949	3.64941174006047	S
1988-07-29	0.00143	172.998606682	9.09125269233	148.558013916	Impr. Grass	211	-6.51571319120611	3.63219753373943	S
1988-07-30	0.001993	61.158926101	2.68196869606	33.7827949524	Arable	212	-6.19333596314665	3.64941174006047	S
1988-07-29	0.002901	221.666049426	9.40144504173	160.423278809	Less managed	211	-5.82561118302133	3.63219753373943	S
1988-07-30	0.001972	104.33995399	5.55528851105	200.9724006652	Arable	212	-6.20366815838386	3.64941174006047	S
1988-07-29	0.001525	157.018201055	8.99635293625	129.179077148	Arable	211	-6.45350000670454	3.63219753373943	S
1988-07-29	0.005216	59.6163744038	2.00443750208	33.5841674805	Arable	211	-5.24648421790802	3.63219753373943	S
1988-07-29	0.002296	175.908148581	8.54326683646	230.268310547	Less managed	211	-6.05504352875085	3.63219753373943	S
1988-07-29	0.002365	197.707623824	9.3450566481	173.137939453	Impr. Grass	211	-6.0260559918776	3.63219753373943	S
1988-07-30	0.002233	49.2490663785	2.71504376028	233.8871803283	Arable	212	-6.08226491143448	3.64941174006047	S
1988-07-30	0.002086	54.1775158673	1.95389189498	41.0932159424	Arable	212	-6.14882035788419	3.64941174006047	S
1988-07-30	0.001708	88.5605631889	5.03397108033	188.0895919804	Impr. Grass	212	-6.34357847971915	3.64941174006047	S
1988-07-30	0.001251	100.131237489	5.86141851402	328.3757362369	Impr. Grass	212	-6.64462207945177	3.64941174006047	S
1988-07-30	0.002349	59.936567565	3.76331882853	224.2460842132	Arable	212	-6.03270329512458	3.64941174006047	S
1988-07-30	0.005691	80.772107959	4.72971429666	209.5739936828	Arable	212	-5.16012186779664	3.64941174006047	S
1988-07-30	0.00208	76.9023610945	4.74149729544	260.1768169405	Arable	212	-6.1516332992608	3.64941174006047	S
1988-07-30	0.00245	89.9929056799	5.62292280872	252.131919861	Impr. Grass	212	-5.99146454710798	3.64941174006047	S
1988-08-17	0.002803	198.287577311	13.4446678162	22.873260498	Arable	230	-5.85938420675077	3.95926745383919	S
1988-08-17	0.002361	135.577445397	3.94992180832	174.6965026855	Arable	230	-6.0277136797831	3.95926745383919	S
1988-08-16	0.001427	190.337239574	3.67305630246	109.838241577	Arable	229	-6.51774227543289	3.94205324751815	S
1988-08-16	0.001638	196.114281184	3.86479721718	85.684494018	Impr. Grass	229	-6.38421088280837	3.94205324751815	S
1988-08-18	0.001952	152.86050937	6.8376155528	173.5031585698	Arable	231	-6.21360859808911	3.97648166016023	S
1988-08-17	0.004331	84.5213607788	2.5993464505	47.1957473756	Arable	230	-5.43047827015038	3.95926745383919	S
1988-08-16	0.001173	200.764635577	4.05385215197	74.793746948	Arable	229	-6.7064484222771	3.94205324751815	S
1988-08-16	0.000178	199.806959247	3.92635599398	49.722015381	Impr. Grass	229	-8.38616492900983	3.94205324751815	S
1988-08-16	0.001485	210.684493065	3.94290190345	95.056488037	Impr. Grass	229	-6.47922489794298	3.94205324751815	S
1988-08-18	0.002138	130.488760071	5.70046905847	199.124778748	Arable	231	-6.1247673944224	3.97648166016023	S
1988-08-18	0.001364	118.868101851	4.82322341535	110.0574760442	Arable	231	-6.56133271150776	3.97648166016023	S
1988-08-16	0.001589	202.011424026	3.63824494369	76.553741455	Arable	229	-6.41366897922044	3.94205324751815	S
1988-08-18	0.003917	86.5577476387	2.45458128397	53.973503113	Arable	231	-5.52974513744994	3.97648166016023	S
1988-08-16	0.002493	139.668781079	6.85453875938	104.3004989627	Arable	229	-5.97441079254215	3.94205324751815	S
1988-08-16	0.001695	95.8728842252	4.69865518376	25.0467452999	Arable	229	-6.35100072332775	3.94205324751815	S
1988-08-17	0.00403	90.9978980619	2.20560423246	71.2147521969	Arable	230	-5.50165829056607	3.95926745383919	S
1988-08-18	0.003163	76.5655007237	2.02004214375	64.0704994204	Arable	231	-5.74055019884842	3.97648166016023	S
1988-08-19	0.00325	240.681603639	2.05436795509	46.431243896	Impr. Grass	232	-5.7138328105097	3.99369586648127	S
1988-08-17	0.002887	86.6830628652	2.83236134989	62.2814941404	Arable	230	-5.83036662676565	3.95926745383919	S
1988-08-16	0.001488	196.537904006	5.5999286512	99.972503662	Impr. Grass	229	-6.47727240789868	3.94205324751815	S
1988-08-16	0.01016	166.506564682	7.80203032655	95.111495972	Arable	229	-4.58438764680556	3.94205324751815	S
1988-08-16	0.0014	194.94062599	4.65720884082	121.585494995	Impr. Grass	229	-6.53619172254965	3.94205324751815	S
1988-08-18	0.00553	156.445428621	5.31245013817	103.2421569826	Arable	231	-5.18856650258892	3.97648166016023	S
1988-08-16	0.001594	187.791130446	5.64805531455	104.900741577	Impr. Grass	229	-6.41062298234815	3.94205324751815	S
1988-08-16	0.00186	209.728899366	4.64376270713	87.151504517	Arable	229	-6.2606520369236	3.94205324751815	S
1988-08-18	0.002337	113.099480587	3.73425249408	95.2833633423	Arable	231	-6.03771793162544	3.97648166016023	S
1988-08-17	0.003659	73.455341079	3.06364660642	35.5775070191	Arable	230	-5.59699298047468	3.95926745383919	S
1988-08-06	0.00125	386.458359733	4.27461301627	114.709991455	Less managed	219	-6.64539101451465	3.76991118430775	S
1988-08-06	0.000857	401.938911106	4.5830702529	73.577270508	Less managed	219	-7.00536810784914	3.76991118430775	S
1988-08-06	0.00063	376.926109113	5.2225202174	90.396759034	Less managed	219	-7.29341775979412	3.76991118430775	S
1988-08-19	0.00268	178.034982341	9.28728959177	107.511749268	Less managed	232	-5.90345366978527	3.99369586648127	S
1988-08-18	0.001817	105.357422108	4.46770152354	178.6675033573	Arable	231	-6.28342241442255	3.97648166016023	S
1988-08-18	0.002604	91.049842862	2.41817842693	36.0663757321	Arable	231	-5.93168734307212	3.97648166016023	S
1988-08-18	0.002661	495	4	0	Arable	231	-5.91043770846561	3.97648166016023	S
1988-08-18	0.007985	114.409352101	7.40294070613	99.447250366	Less managed	231	-4.82394827979266	3.97648166016023	S
1988-08-18	0.006728	94.8755453229	2.0548245168	64.0215034487	Arable	231	-4.99407320579728	3.97648166016023	S
1988-08-18	0.0026	76.7633496453	2.62354623319	44.4562454227	Arable	231	-5.93319563898401	3.97648166016023	S
1988-08-19	0.003721	96.6480086067	3.1592258899	71.3195037845	Arable	232	-5.58041506070592	3.99369586648127	S
1988-08-18	0.005028	82.7673073996	2.3351734067	45.1493377689	Arable	231	-5.28283779569965	3.97648166016023	S
1988-08-19	0.00157	165.587014677	6.2211352633	132.951248168	Arable	232	-6.42532912973784	3.99369586648127	S
1988-08-19	0.002292	192.526113727	4.49368880276	132.493499756	Arable	232	-6.05675001380661	3.99369586648127	S
1988-08-19	0.001478	215.921473201	5.84995760174	167.90901947	Arable	232	-6.48379558823781	3.99369586648127	S
1988-08-20	0.001812	224.117845835	3.88219325094	70.4375	Arable	233	-6.28610410012726	4.01091007280231	S
1988-08-20	0.003068	200.966580903	3.32838683199	89.55973816	Impr. Grass	233	-5.77056350834655	4.01091007280231	S
1988-08-20	0.001485	210.121311986	3.70439859116	74.739746094	Arable	233	-6.47922489794298	4.01091007280231	S
1988-08-19	0.007748	79.9028909103	2.65332426714	50.6057472231	Arable	232	-4.85388798842173	3.99369586648127	S
1988-08-18	0.004878	84.4694821147	2.19156346547	45.8133697506	Arable	231	-5.31282205275092	3.97648166016023	S
1988-08-20	0.002345	205.661793676	3.00649866125	53.659744262	Impr. Grass	233	-6.03437204811926	4.01091007280231	S
1988-08-20	0.003232	210.730363152	1.97842107333	30.053009033	Impr. Grass	233	-5.71930228631424	4.01091007280231	S
1988-08-20	0.003882	212.471713031	2.21215873736	31.799240112	Arable	233	-5.53860707669722	4.01091007280231	S
1988-08-20	0.001207	208.035824966	3.21707116365	58.091003418	Impr. Grass	233	-6.67902734937403	4.01091007280231	S
1988-08-20	0.002797	206.587803976	3.94309649725	78.785736084	Arable	233	-5.86148947068624	4.01091007280231	S
1988-08-18	0.004175	67.8424315739	1.95158340057	37.5760002136	Suburban	231	-5.466736018173	3.97648166016023	S
1988-08-20	0.0013	217.862738909	6.20690741603	50.948730468	Impr. Grass	233	-6.6076506865318	4.01091007280231	S
1988-08-18	0.002141	83.1653503229	2.1930883	42.7957458492	Arable	231	-6.12339721836881	3.97648166016023	S
1988-08-19	0.001515	221.052463661	4.22173901913	54.56199646	Arable	232	-6.45986945499002	3.99369586648127	S
1988-08-14	0.002622	71.6673736572	7.21409010887	3.8127441406	Arable	227	-5.92492802330774	3.90762483487607	S
1988-08-18	0.002664	126.996153684	6.26911373538	221.0202064517	Arable	231	-5.90933171756946	3.97648166016023	S
1988-08-19	0.001296	256.881389486	5.46579734673	83.648010254	Arable	232	-6.6106180477596	3.99369586648127	S
1988-08-20	0.002306	207.918021347	5.25033073505	107.957000732	Arable	233	-6.0507900131928	4.01091007280231	S
1988-08-20	0.001717	213.568751079	3.11053153279	59.960739136	Impr. Grass	233	-6.33847208564458	4.01091007280231	S
1988-08-20	0.001769	193.413372214	4.4156157894	122.74949646	Arable	233	-6.30946837944615	4.01091007280231	S
1988-08-24	0.001398	180.544234602	6.20141498411	106.046005249	Impr. Grass	237	-6.53757198501861	4.07976689808647	S
1988-08-20	0.002053	182.381526999	2.78349259769	65.714752197	Arable	233	-6.16439038226157	4.01091007280231	S
1988-08-20	0.00163	218.75894552	3.94972412774	59.411254883	Impr. Grass	233	-6.38896148556697	4.01091007280231	S
1988-08-20	0.001689	179.731143708	3.36709907714	40.96723938	Arable	233	-6.35444504360999	4.01091007280231	S
1988-08-25	0.001139	194.634764143	5.5199323717	146.0724945072	Impr. Grass	238	-6.73464266127349	4.09698110440751	S
1988-08-17	0.000516	340.168730206	6.19189363316	184.759002685	Less managed	230	-7.47691647976109	3.95926745383919	S
1988-08-17	0.001017	263.111642916	9.37040959786	221.465011597	Impr. Grass	230	-6.84290430666252	3.95926745383919	S
1988-08-17	0.001097	340.786046679	4.68641223988	96.117004394	Less managed	230	-6.7706054408349	3.95926745383919	S
1988-08-17	0.000866	301.63445934	9.502693372	161.386749267	Less managed	230	-6.99549419329014	3.95926745383919	S
1988-08-17	0.000636	345.021572844	6.15941026051	146.868255615	Less managed	230	-7.28463293023839	3.95926745383919	S
1988-08-17	0.000629	360.608200717	6.09895419042	127.286010742	Less managed	230	-7.29488943040558	3.95926745383919	S
1988-08-17	0.001215	241.276802747	12.3077478285	138.31274414	Less managed	230	-6.67268315680265	3.95926745383919	S
1988-08-17	0.000891	265.633622247	14.4470338676	164.500518798	Less managed	230	-6.96856741837889	3.95926745383919	S
1988-08-17	0.000854	322.853219622	6.32895281938	167.993499756	Less managed	230	-7.0086811975721	3.95926745383919	S
1988-08-17	0.000938	303.068125525	8.38989845473	89.894500732	Less managed	230	-6.91982786021641	3.95926745383919	S
1988-08-17	0.000971	285.434936358	10.2849708938	118.177017212	Less managed	230	-6.88697273979961	3.95926745383919	S
1988-08-17	0.006819	362.304888916	3.39623727332	69.208007812	Less managed	230	-4.98073674375039	3.95926745383919	S
1988-08-17	0.001931	326.172461794	7.06061645736	99.905517579	Less managed	230	-6.22415351126572	3.95926745383919	S
1988-08-17	0.001511	278.969499246	12.4950106511	89.158752441	Impr. Grass	230	-6.46242863744884	3.95926745383919	S
1988-08-17	0.000984	340.999900231	7.1102296455	84.230255127	Impr. Grass	230	-6.8743205028959	3.95926745383919	S
1988-08-17	0.002856	179.536722006	6.12214625696	141.907745361	Impr. Grass	230	-5.84097771383405	3.95926745383919	S
1988-08-17	0.000913	258.293483189	7.86811545917	65.386734009	Impr. Grass	230	-6.94545714616615	3.95926745383919	S
1988-08-19	0.000551	351.95670929	10.8518029589	186.016754151	Less managed	232	-7.41691562342907	3.99369586648127	S
1988-08-19	0.000847	296.197108964	14.4928554276	216.158248902	Less managed	232	-7.01645469590548	3.99369586648127	S
1988-08-20	0.001302	204.389356701	5.70085250215	133.584487915	Impr. Grass	233	-6.60617030136136	4.01091007280231	S
1988-08-20	0.001313	220.649972833	5.50146626195	98.378005981	Impr. Grass	233	-6.59806712626774	4.01091007280231	S
1988-08-20	0.005037	159.651378632	9.00183826685	28.044250488	Impr. Grass	233	-5.28106701314151	4.01091007280231	S
1988-08-20	0.001189	238.874271861	3.07512631646	49.709747315	Impr. Grass	233	-6.69345067633513	4.01091007280231	S
1988-08-20	0.001112	203.857378184	8.04213655032	88.804244995	Impr. Grass	233	-6.75761262055242	4.01091007280231	S
1988-08-20	0.000584	227.822802097	5.80138685205	111.869262695	Impr. Grass	233	-7.36346160352705	4.01091007280231	S
1988-08-20	0.001083	218.452114913	4.2196230933	82.808502197	Impr. Grass	233	-6.78288629693627	4.01091007280231	S
1988-08-20	0.000959	228.192487782	4.34640147768	56.59451294	Impr. Grass	233	-6.89879553761067	4.01091007280231	S
1988-08-25	0.000712	302.618709602	7.99318044935	169.79725647	Impr. Grass	238	-7.17956400227763	4.09698110440751	S
1988-08-30	0.002499	257.624799531	9.80696390107	79.64276123	Less managed	243	-5.97205415358816	4.18305213601271	S
1988-08-30	0.001495	196.245502071	8.05499750982	195.348747254	Impr. Grass	243	-6.47273136863243	4.18305213601271	S
1988-08-30	0.002789	172.154989421	5.41033662399	179.0952453615	Impr. Grass	243	-5.8643034014913	4.18305213601271	S
1988-08-30	0.002163	159.625987907	5.42446695649	186.044250488	Impr. Grass	243	-6.11340621791322	4.18305213601271	S
1988-08-30	0.001486	136.146215319	4.65544643299	200.1007537839	Impr. Grass	243	-6.47857364425666	4.18305213601271	S
1988-08-31	0.003564	286.939128067	9.20905726606	94.89100647	Less managed	244	-5.6229400868121	4.20026634233375	S
1988-08-31	0.001017	299.141710644	7.30568530868	294.696243286	Impr. Grass	244	-6.84290430666252	4.20026634233375	S
1988-09-01	0.003643	194.985703742	2.41455504033	44.460250855	Arable	245	-5.60131614311171	4.21748054865479	S
1988-08-31	0.002769	322.669474455	9.2952493091	160.840240478	Less managed	244	-5.87137306685016	4.20026634233375	S
1988-08-01	0.002112	203.278909145	3.40507727097	37.483993531	Arable	214	-6.13672155976512	3.68384015270255	S
1988-08-31	0.00537	98.2144296699	2.84213517834	51.2815093998	Arable	244	-5.21765946353058	4.20026634233375	S
1988-09-01	0.001124	197.327993002	3.49245624398	94.707244873	Arable	245	-6.74733855757623	4.21748054865479	S
1988-08-31	0.001455	141.534748337	3.25833917762	72.970497132	Arable	244	-6.4989623807813	4.20026634233375	S
1988-09-01	0.003092	182.098664478	2.91743067884	67.147491455	Impr. Grass	245	-5.76289573914871	4.21748054865479	S
1988-08-31	0.001978	104.252398752	4.35430319305	74.2490005495	Impr. Grass	244	-6.2007051932532	4.20026634233375	S
1988-09-01	0.00139	215.873988032	9.70057755837	164.944244385	Impr. Grass	245	-6.54311216539423	4.21748054865479	S
1988-08-31	0.001896	111.061970775	3.15306421798	204.4482421877	Arable	244	-6.24197929521832	4.20026634233375	S
1988-08-31	0.001154	520	3.5	0	Less managed	244	-6.72210593209551	4.20026634233375	S
1988-09-01	0.001566	178.030967309	6.01659713019	136.000747681	Arable	245	-6.42780131888323	4.21748054865479	S
1988-08-31	0.005648	102.831318215	2.82744684686	57.3324966431	Arable	244	-5.16764004290642	4.20026634233375	S
1988-08-31	0.003946	138.78483349	2.56285005013	48.888748169	Arable	244	-5.52246141819583	4.20026634233375	S
1988-09-01	0.003249	160.883592326	5.06948254629	255.136489868	Impr. Grass	245	-5.71413588673569	4.21748054865479	S
1988-08-31	0.001745	150.193059046	4.12655055313	70.358245849	Impr. Grass	244	-6.32275025704189	4.20026634233375	S
1988-08-31	0.003065	258.819364371	10.5625297605	175.64074707	Impr. Grass	244	-5.77152612674272	4.20026634233375	S
1988-09-01	0.001893	230.556187923	9.3224108068	119.737243652	Impr. Grass	245	-6.24352210858683	4.21748054865479	S
1988-09-01	0.002013	187.897303263	1.4312689102	21.152236939	Arable	245	-6.18359404489302	4.21748054865479	S
1989-06-21	7e-04	218.192370234	10.2172285129	183.756500245	Impr. Grass	172	-7.19543735143392	2.96084348721887	S
1989-06-21	0.007117	132.036601505	8.66648366	69.495254517	Impr. Grass	172	-4.93826812197035	2.96084348721887	S
1989-06-20	0.000872	175.116146548	6.26514038316	187.7767562862	Impr. Grass	171	-6.98896533440768	2.94362928089783	S
1989-06-21	0.000843	117.958675822	3.29170817339	47.0884933469	Impr. Grass	172	-7.02092397708777	2.96084348721887	S
1989-06-20	0.002483	170.314813682	4.11928555037	101.002746582	Impr. Grass	171	-5.9783509079626	2.94362928089783	S
1989-06-21	0.001023	169.302542174	4.04932160845	111.550003052	Impr. Grass	172	-6.83729681533358	2.96084348721887	S
1989-06-20	0.000658	158.102216953	5.80864206175	148.0197448731	Impr. Grass	171	-7.25306646427055	2.94362928089783	S
1989-06-21	0.000922	202.749937693	8.84796360508	168.647735596	Impr. Grass	172	-6.93615475350384	2.96084348721887	S
1989-06-21	0.000946	244.92553962	8.4924050816	176.246246338	Impr. Grass	172	-6.91176330037968	2.96084348721887	S
1989-06-21	0.001321	173.45505216	4.38651811305	131.236747742	Impr. Grass	172	-6.59221487840196	2.96084348721887	S
1989-06-21	0.00071	168.125829663	9.7187392629	243.4519958501	Impr. Grass	172	-7.1821921246839	2.96084348721887	S
1989-06-20	0.000519	235.735152611	10.8992893268	106.022750854	Impr. Grass	171	-7.47163012383794	2.94362928089783	S
1989-06-22	0.002992	165.977173288	3.5570892678	54.790008545	Impr. Grass	173	-5.79524008514504	2.97805769353991	S
1989-06-21	0.001033	168.339488667	3.89569497121	133.2029953	Impr. Grass	172	-6.82802031096328	2.96084348721887	S
1989-06-21	0.000879	195.820325084	7.44688993887	221.6462402347	Impr. Grass	172	-6.98140181915044	2.96084348721887	S
1989-06-20	0.000467	232.396087578	9.15714367596	189.119247437	Impr. Grass	171	-7.56746768345585	2.94362928089783	S
1989-06-22	0.000823	500	2.5	0	Less managed	173	-7.04357500212467	2.97805769353991	S
1989-06-21	0.002277	133.677445831	8.64082678229	85.1624984744	Impr. Grass	172	-6.06317539466198	2.96084348721887	S
1989-06-21	0.000819	198.560164018	5.18401670555	104.21774292	Impr. Grass	172	-7.04816743269888	2.96084348721887	S
1989-06-20	0.000598	158.547559756	4.00209471419	80.148757934	Impr. Grass	171	-7.341619861612	2.94362928089783	S
1989-06-21	0.000842	140.129195319	7.8070250573	81.9860000612	Impr. Grass	172	-7.02204442538426	2.96084348721887	S
1989-06-21	0.000925	197.6875361	12.5145558482	193.300262451	Impr. Grass	172	-6.93307308696643	2.96084348721887	S
1989-06-21	0.000957	233.255195283	7.90039750083	228.261489869	Impr. Grass	172	-6.90077966524571	2.96084348721887	S
1989-06-20	0.000574	299.116337652	6.09898836284	126.654510498	Impr. Grass	171	-7.37936018959485	2.94362928089783	S
1989-06-21	0.001891	133.790330775	6.71433605867	45.6095047	Impr. Grass	172	-6.24455197479526	2.96084348721887	S
1989-06-20	0.000592	282.333496094	7.27627325058	0	Impr. Grass	171	-7.35092225427431	2.94362928089783	S
1989-06-25	0.001128	113.450664854	6.30860002758	116.7537498472	Impr. Grass	176	-6.74393719375274	3.02970031250303	S
1989-06-24	0.001661	72.8788757324	10.3317041397	7.73175048830001	Impr. Grass	175	-6.37067728407208	3.01248610618199	S
1989-06-23	0.001073	86.7067498684	4.82629759386	58.0419998165	Impr. Grass	174	-6.79175160322583	2.99527189986095	S
1989-06-25	0.001354	53.4981870651	2.13776768744	2.3115005493	Impr. Grass	176	-6.56842997337852	3.02970031250303	S
1989-06-23	0.000555	140.126292836	7.92849393324	69.984992981	Less managed	174	-7.41028209993343	2.99527189986095	S
1989-06-23	0.000555	140.126292836	7.92849393324	69.984992981	Less managed	174	-7.41028209993343	2.99527189986095	S
1989-06-23	0.000555	140.126292836	7.92849393324	69.984992981	Less managed	174	-7.41028209993343	2.99527189986095	S
1989-06-23	0.000555	140.126292836	7.92849393324	69.984992981	Less managed	174	-7.41028209993343	2.99527189986095	S
1989-06-23	0.000555	140.126292836	7.92849393324	69.984992981	Less managed	174	-7.41028209993343	2.99527189986095	S
1989-06-23	0.000555	140.126292836	7.92849393324	69.984992981	Less managed	174	-7.41028209993343	2.99527189986095	S
1989-06-23	0.000555	140.126292836	7.92849393324	69.984992981	Less managed	174	-7.41028209993343	2.99527189986095	S
1989-06-23	0.000555	140.126292836	7.92849393324	69.984992981	Less managed	174	-7.41028209993343	2.99527189986095	S
1989-06-23	0.005495	117.419281062	2.639466664	28.569007874	Impr. Grass	174	-5.19485865817981	2.99527189986095	S
1989-06-25	0.001011	84.0755400356	4.76370755001	78.7967529294	Impr. Grass	176	-6.84854341935029	3.02970031250303	S
1989-06-25	0.001064	101.616857036	2.87174019988	75.7929992674	Impr. Grass	176	-6.79979813747704	3.02970031250303	S
1989-06-23	0.00176	88.5412485681	3.85590089036	64.6585044858	Impr. Grass	174	-6.3144284337044	2.99527189986095	S
1989-06-25	0.000899	62.5206249856	4.92238626126	55.5330009461	Impr. Grass	176	-6.96010175935435	3.02970031250303	S
1989-06-27	0.001034	213.459335984	5.91553552511	153.789733887	Impr. Grass	178	-6.82709737596468	3.06412872514511	S
1989-06-27	0.002358	194.891155751	5.33173652758	187.517486572	Impr. Grass	178	-6.02895875153556	3.06412872514511	S
1989-06-27	0.001394	193.028693973	6.29909367071	183.346984864	Impr. Grass	178	-6.5403382385115	3.06412872514511	S
1989-06-27	0.001286	149.27014648	3.41943563981	85.848999024	Impr. Grass	178	-6.61807520386768	3.06412872514511	S
1989-06-27	0.002322	182.905316323	3.67904058217	98.129760743	Impr. Grass	178	-6.04402179784666	3.06412872514511	S
1989-07-01	0.000708	244.665666979	7.6524417688	207.418991089	Impr. Grass	182	-7.1848271723219	3.13298555042927	S
1989-07-01	0.001153	246.477941941	9.73065374944	156.029785156	Impr. Grass	182	-6.7229368419896	3.13298555042927	S
1989-07-01	0.0016	95.6632696533	3.17722530524	46.9027481076	Impr. Grass	182	-6.40697999106965	3.13298555042927	S
1989-07-01	0.000569	310.978635348	2.30040012873	20.716735839	Impr. Grass	182	-7.38740528527968	3.13298555042927	S
1989-07-01	0.002152	87.7912521921	4.40798152432	161.7332553862	Impr. Grass	182	-6.11838924068165	3.13298555042927	S
1989-07-01	0.000982	156.943548859	5.08290041372	80.430244445	Impr. Grass	182	-6.87625661192277	3.13298555042927	S
1989-07-01	0.001039	231.218774259	8.2925117582	179.697998047	Impr. Grass	182	-6.82249543503131	3.13298555042927	S
1989-07-01	0.001233	198.445050981	6.84874865744	173.712249756	Impr. Grass	182	-6.65855419334864	3.13298555042927	S
1989-07-01	0.0033	56.7126581316	5.36438999497	63.6437492371	Impr. Grass	182	-5.69879493314516	3.13298555042927	S
1989-07-01	0.000434	272.666276062	6.0587979573	122.51550293	Impr. Grass	182	-7.63342565124764	3.13298555042927	S
1989-06-28	0.003194	74.1567080286	11.0812631117	119.9745082852	Less managed	179	-5.73094814272897	3.08134293146615	S
1989-07-01	0.000451	172.275097656	18.5801158905	73.110748291	Impr. Grass	182	-7.59890445687941	3.13298555042927	S
1989-07-01	0.000682	217.498268286	9.78588413199	113.081253052	Impr. Grass	182	-7.21973004400296	3.13298555042927	S
1989-07-01	0.00081	259.457138048	8.71479993947	177.038513184	Impr. Grass	182	-7.05857816871672	3.13298555042927	S
1989-07-01	0.000747	301.943467936	3.45764196265	74.691497803	Impr. Grass	182	-7.13465587917406	3.13298555042927	S
1989-07-01	0.002032	72.8958978553	4.87191229853	140.4680023193	Impr. Grass	182	-6.17442630878936	3.13298555042927	S
1989-07-02	0.00151	275.15830158	6.54153278361	146.685241699	Impr. Grass	183	-6.46306945772069	3.15019975675031	S
1989-07-01	0.000768	288.360845092	8.12676947967	102.574768067	Impr. Grass	182	-7.10864822136153	3.13298555042927	S
1989-07-01	0.000862	320.469193892	4.67215400934	22.684265137	Less managed	182	-6.99987056788994	3.13298555042927	S
1989-07-01	0.000548	300.146488916	5.17194854858	110.893264771	Less managed	182	-7.42191980401364	3.13298555042927	S
1989-07-02	0.001389	216.335878733	9.81142200865	171.876991272	Impr. Grass	183	-6.54380685107691	3.15019975675031	S
1989-07-01	0.001726	267.294471315	5.38294922473	105.528488159	Impr. Grass	182	-6.33339163441216	3.13298555042927	S
1989-07-01	0.001476	221.024261559	8.20273841156	138.572998047	Impr. Grass	182	-6.48510534611987	3.13298555042927	S
1989-07-02	0.000556	262.163683969	11.1100680818	172.854736328	Impr. Grass	183	-7.40863057189496	3.15019975675031	S
1989-07-01	0.00078	267.40972048	8.82935721155	139.169738769	Impr. Grass	182	-7.09408485717363	3.13298555042927	S
1989-07-04	0.000677	663.235137364	10.3535703983	164.144470215	Less managed	185	-7.22658408043075	3.18462816939239	S
1989-07-04	0.000566	542.296791316	14.8461879598	251.634521485	Less managed	185	-7.39226359443075	3.18462816939239	S
1989-07-05	0.003403	195.637379646	6.91990896563	91.715240479	Impr. Grass	186	-5.66851186057428	3.20184237571343	S
1989-07-05	0.001	385.191827722	10.3749292928	143.926757812	Less managed	186	-6.85896511481271	3.20184237571343	S
1989-07-05	0.001552	201.440238478	3.262110945	53.784500122	Impr. Grass	186	-6.43650243033597	3.20184237571343	S
1989-07-05	0.000681	239.834974877	10.2598003275	296.937255859	Impr. Grass	186	-7.2210970982145	3.20184237571343	S
1989-07-05	0.004389	255	2.5	0	Impr. Grass	186	-5.41732615313024	3.20184237571343	S
1989-07-05	0.001626	209.671733163	4.17490290833	114.578750611	Impr. Grass	186	-6.39134527692225	3.20184237571343	S
1989-07-04	0.002335	528.890084931	11.3789171595	189.191772461	Less managed	185	-6.03855615464183	3.18462816939239	S
1989-07-05	0.001574	190.487113891	4.99909458647	134.554748535	Impr. Grass	186	-6.42286303724265	3.20184237571343	S
1989-07-05	0.00661	198.318285066	3.29332525919	60.508499145	Impr. Grass	186	-5.01163579442984	3.20184237571343	S
1989-07-02	0.000703	220.144272405	10.3796610801	150.124740601	Impr. Grass	183	-7.19144533016438	3.15019975675031	S
1989-07-05	0.000704	133.51625061	4.05183744431	0	Impr. Grass	186	-7.19011818995632	3.20184237571343	S
1989-07-02	0.001655	167.916109662	9.21466065978	110.876495361	Impr. Grass	183	-6.37419016824666	3.15019975675031	S
1989-07-06	0.000953	360.365072424	8.80385376242	338.286499024	Less managed	187	-6.90475977000234	3.21905658203447	S
1989-07-06	0.005581	199.48965268	7.30036981513	88.136489868	Less managed	187	-5.17946823270966	3.21905658203447	S
1989-07-06	0.000789	481.889844425	10.2185457176	358.965026855	Less managed	187	-7.08329985149707	3.21905658203447	S
1989-07-06	0.000808	180.857813875	4.01255250523	66.109985351	Impr. Grass	187	-7.06090645847631	3.21905658203447	S
1989-07-06	0.000636	231.13243103	10.1302654062	79.421005249	Impr. Grass	187	-7.28463293023839	3.21905658203447	S
1989-07-06	0.00048	455.604577498	12.5092980909	387.532989502	Less managed	187	-7.54263355141811	3.21905658203447	S
1989-07-06	0.000534	216.734606062	6.74854200227	59.614257813	Impr. Grass	187	-7.44560957513605	3.21905658203447	S
1989-07-06	0.001205	520.353595734	13.5106716156	82.34451294	Less managed	187	-6.68061970639839	3.21905658203447	S
1989-07-06	0.001226	242.548522929	6.34075316113	194.902496338	Impr. Grass	187	-6.66402509405954	3.21905658203447	S
1989-07-06	0.000843	548.814489746	6.7539783597	33.132995606	Less managed	187	-7.02092397708777	3.21905658203447	S
1989-07-06	0.000631	354.527898069	10.9035713223	317.864257812	Less managed	187	-7.29194825181476	3.21905658203447	S
1989-07-06	0.000787	385.924255371	10.4079313278	0	Less managed	187	-7.0856864874748	3.21905658203447	S
1989-07-06	0.000616	419.03071806	12.1459266072	452.860229492	Less managed	187	-7.31422088742389	3.21905658203447	S
1989-07-06	0.000966	306.182626272	9.74684122219	344.721466065	Less managed	187	-6.89188192982585	3.21905658203447	S
1989-07-06	0.000432	471.472013542	18.428838029	169.028503418	Less managed	187	-7.63756644391367	3.21905658203447	S
1989-07-06	0.000863	271.32664865	11.4958687268	178.259246826	Impr. Grass	187	-6.99877467736931	3.21905658203447	S
1989-07-21	0.000476	325.787010986	5.18722352185	96.471252442	Less managed	202	-7.55020934522656	3.47726967685007	S
1989-07-21	0.000714	220.669719442	10.7799283743	123.127761841	Less managed	202	-7.17694276879775	3.47726967685007	S
1989-07-21	0.000707	315.470597546	5.7133494545	162.825241089	Less managed	202	-7.18614730452683	3.47726967685007	S
1989-07-21	0.000784	284.356149329	5.92748993456	82.220733643	Less managed	202	-7.08927715560553	3.47726967685007	S
1989-07-21	0.001454	249.342823417	10.4475045276	173.608520508	Impr. Grass	202	-6.49962705345449	3.47726967685007	S
1989-07-21	0.000551	266.19936848	8.56390407462	135.210494995	Less managed	202	-7.41691562342907	3.47726967685007	S
1989-07-21	0.000898	244.808886318	8.6765477105	196.043235779	Impr. Grass	202	-6.96115605570925	3.47726967685007	S
1989-07-21	0.000706	229.318112248	12.6293156574	216.991989136	Less managed	202	-7.18746918178474	3.47726967685007	S
1989-07-21	0.001267	189.33443681	7.08853086403	115.676239013	Impr. Grass	202	-6.63239885622099	3.47726967685007	S
1989-07-21	0.001189	184.461578369	7.94217573679	136.441513061	Impr. Grass	202	-6.69345067633513	3.47726967685007	S
1989-07-21	0.001202	206.765952326	9.65892292992	95.489257812	Less managed	202	-6.68301300630423	3.47726967685007	S
1989-07-21	0.001541	263.87334924	6.68413482136	68.731002807	Less managed	202	-6.44339252962649	3.47726967685007	S
1989-07-21	0.000998	268.6019921	2.44983904894	28.649505615	Impr. Grass	202	-6.86087169308329	3.47726967685007	S
1989-07-21	0.004854	217.972427537	5.97954304265	163.186759949	Impr. Grass	202	-5.31770408034823	3.47726967685007	S
1989-07-21	0.000933	168.030778426	7.55261014421	83.980995178	Impr. Grass	202	-6.92490143781711	3.47726967685007	S
1989-07-21	0.000894	270.656831155	9.90166095907	179.860015869	Less managed	202	-6.96538439181877	3.47726967685007	S
1989-07-21	0.001426	257.366500529	6.984396162	170.205764771	Impr. Grass	202	-6.51841955280386	3.47726967685007	S
1989-07-20	0.001349	175.976287579	9.55397114836	207.6177520751	Impr. Grass	201	-6.57199758329879	3.46005547052903	S
1989-07-25	0.001387	153.57484564	7.67782698601	86.709762573	Impr. Grass	206	-6.54519767188525	3.54612650213423	S
1989-07-31	0.00175	215.14361854	3.87759878269	56.637008667	Impr. Grass	212	-6.31996861408002	3.64941174006047	S
1989-08-06	0.001898	503.074742676	14.6712091796	460.336456299	Less managed	218	-6.24095207376179	3.75269697798671	S
1989-08-06	0.000833	411.33563901	16.3320158151	281.487243652	Less managed	218	-7.03218535736031	3.75269697798671	S
1989-08-06	0.001183	292.13502225	14.645438143	269.869750977	Less managed	218	-6.69830505479993	3.75269697798671	S
1989-08-06	0.001095	555.692626078	12.7911846832	346.776702881	Less managed	218	-6.77235064197593	3.75269697798671	S
1989-08-15	0.001747	256.410400867	2.2106862464	22.207244873	Impr. Grass	227	-6.32163667118072	3.90762483487607	S
1989-08-12	0.001255	342.648830937	6.55220824246	123.588012696	Impr. Grass	224	-6.64155223820748	3.85598221591295	S
1989-08-12	0.000584	515.241293257	13.6148499979	357.276245117	Less managed	224	-7.36346160352705	3.85598221591295	S
1989-08-12	0.000854	552.319386036	13.3223749272	233.303497315	Less managed	224	-7.0086811975721	3.85598221591295	S
1989-08-12	0.000627	527.761711879	7.54235956785	178.491516113	Less managed	224	-7.297839285052	3.85598221591295	S
1989-08-12	0.000998	505.466597015	16.706066356	213.633483886	Less managed	224	-6.86087169308329	3.85598221591295	S
1989-08-12	0.000467	538.02903517	7.49059124416	177.354980468	Less managed	224	-7.56746768345585	3.85598221591295	S
1989-08-16	0.001513	231.848422741	2.10852058052	29.111755371	Impr. Grass	228	-6.4611482275428	3.92483904119711	S
1989-08-18	0.001942	186.895253068	7.43814571278	167.856498718	Less managed	230	-6.21861611981973	3.95926745383919	S
1989-08-15	0.002455	432.845565796	4.68149483204	6.00173950200002	Less managed	227	-5.98946654444531	3.90762483487607	S
1989-08-16	0.001211	208.82637413	5.67445807523	207.815261841	Arable	228	-6.67585022199935	3.92483904119711	S
1989-08-16	0.001078	212.792326494	7.1770566449	63.004257202	Impr. Grass	228	-6.78730912590627	3.92483904119711	S
1989-08-15	0.00211	229.766560872	4.88305348104	73.45425415	Impr. Grass	227	-6.13764705728606	3.90762483487607	S
1989-08-15	0.002041	222.268644094	5.81911352596	172.430000305	Impr. Grass	227	-6.17011285853564	3.90762483487607	S
1989-08-16	0.001597	174.839117655	5.5812309239	93.472747803	Arable	228	-6.40879982778663	3.92483904119711	S
1989-08-15	0.002256	225.955099611	4.24935797564	138.691009522	Impr. Grass	227	-6.07224085713527	3.90762483487607	S
1989-08-17	0.001495	213.910609629	4.42543735929	163.421768189	Impr. Grass	229	-6.47273136863243	3.94205324751815	S
1989-08-16	0.002247	238.962590535	4.2041901543	115.478988648	Impr. Grass	228	-6.07615135527518	3.92483904119711	S
1989-08-15	0.002011	205.228731915	4.62486644378	195.036499024	Arable	227	-6.18456397707381	3.90762483487607	S
1989-08-16	0.001853	191.954577054	4.03528662292	89.318756104	Impr. Grass	228	-6.26432369066812	3.92483904119711	S
1989-08-16	0.001471	193.307456089	4.49459026321	90.607498168	Impr. Grass	228	-6.48838726570498	3.92483904119711	S
1989-08-16	0.001072	542.773127506	8.33223111614	143.175292969	Less managed	228	-6.79264247188163	3.92483904119711	S
1989-08-15	0.000998	366.654012044	10.6549095752	66.559753418	Less managed	227	-6.86087169308329	3.90762483487607	S
1989-08-15	0.000573	478.31216685	6.5879013141	12.530731202	Less managed	227	-7.38096403917682	3.90762483487607	S
1989-08-15	0.000506	553.47092368	16.1017171559	388.372192383	Less managed	227	-7.49474226371369	3.90762483487607	S
1989-08-15	0.000419	604.915018957	17.5670268935	255.114471436	Less managed	227	-7.66490778951799	3.90762483487607	S
1989-08-12	0.000452	646.826711019	4.4082176288	17.46472168	Less managed	224	-7.59691043827254	3.85598221591295	S
1989-08-13	0.000566	526.223960876	19.5325696128	267.545471192	Less managed	225	-7.39226359443075	3.87319642223399	S
1989-08-13	0.002485	607.761490745	12.9697496823	179.639526367	Less managed	225	-5.97756164193899	3.87319642223399	S
1989-08-16	0.001066	553.535860638	6.5148939518	123.808502197	Less managed	228	-6.79800441502302	3.92483904119711	S
1989-08-13	0.000802	491.20068264	18.3555716351	244.50378418	Less managed	225	-7.06792403113496	3.87319642223399	S
1989-08-12	0.000576	515.763170515	12.7711886905	223.171020508	Less managed	224	-7.37616018686418	3.85598221591295	S
1989-08-13	0.00185	508.580119019	11.3661362314	147.020019531	Less managed	225	-6.26590139280974	3.87319642223399	S
1989-08-16	0.000541	503.647013284	6.70782219705	226.192749023	Less managed	228	-7.43369454055818	3.92483904119711	S
1989-08-15	0.001108	468.023303223	9.94044523239	78.322265625	Less managed	227	-6.76106089983133	3.90762483487607	S
1989-08-13	0.000361	579.286111499	5.79892936112	153.412475586	Less managed	225	-7.79691734346804	3.87319642223399	S
1989-08-16	0.000521	471.528198242	6.25734758377	3.09548950199996	Less managed	228	-7.46812134830826	3.92483904119711	S
1989-08-13	0.00041	594.062790176	12.5171942509	256.19152832	Less managed	225	-7.68428406848113	3.87319642223399	S
1989-08-15	0.001625	346.48916583	9.27159325757	194.424499512	Less managed	227	-6.39194211370511	3.90762483487607	S
1989-08-13	0.000587	523.524770949	15.024575207	211.280517578	Less managed	225	-7.35874090239211	3.87319642223399	S
1989-08-15	0.001231	318.373803618	7.40453112053	220.386505127	Less managed	227	-6.66011425606754	3.90762483487607	S
1989-08-15	0.001685	384.022789655	7.02046468258	183.427246093	Less managed	227	-6.35674786558331	3.90762483487607	S
1989-08-13	0.000498	522.519235665	12.6339038069	399.190490723	Less managed	225	-7.50923527101626	3.87319642223399	S
1989-08-15	0.000451	560.696498461	7.76408410813	310.445251464	Less managed	227	-7.59890445687941	3.90762483487607	S
1989-08-17	0.002553	168.066035861	4.73421315991	98.557250976	Arable	229	-5.95109065296971	3.94205324751815	S
1989-08-19	0.00192	178.326824738	6.12884348773	238.6640014649	Impr. Grass	231	-6.22972173623224	3.97648166016023	S
1989-08-19	0.00211	226.371378128	5.83072681541	86.926239013	Arable	231	-6.13764705728606	3.97648166016023	S
1989-08-18	0.000998	250.843650253	11.7397887221	216.757232666	Less managed	230	-6.86087169308329	3.95926745383919	S
1989-08-17	0.001831	171.394022906	4.57713047912	72.789993286	Arable	229	-6.27595172866324	3.94205324751815	S
1989-08-17	0.002358	127.861460606	3.45305102785	46.0452499392	Arable	229	-6.02895875153556	3.94205324751815	S
1989-08-16	0.002585	226.88929378	6.66710123675	118.756011963	Impr. Grass	228	-5.93887209698881	3.92483904119711	S
1989-08-17	0.005758	112.881915673	4.01925268108	69.1727447512	Arable	229	-5.14851900145964	3.94205324751815	S
1989-08-18	0.002539	206.487392392	8.43347215969	145.498260498	Arable	230	-5.95648357821274	3.95926745383919	S
1989-08-17	0.001421	169.539876343	4.40847394986	99.649765014	Arable	229	-6.52181283736284	3.94205324751815	S
1989-08-17	0.002577	128.11939918	3.8852746063	101.3227539065	Arable	229	-5.94191276827873	3.94205324751815	S
1989-08-17	0.000864	126.388505182	4.73517202733	102.5360107417	Arable	229	-6.99767998651012	3.94205324751815	S
1989-08-18	0.002405	138.334591692	6.03951129893	105.6484985351	Arable	230	-6.00962851773565	3.95926745383919	S
1989-08-19	0.002723	152.281108856	5.06060546637	71.142997742	Arable	231	-5.8878255123485	3.97648166016023	S
1989-08-18	0.002596	159.082269033	2.69823416571	11.458740234	Less managed	230	-5.93470621328937	3.95926745383919	S
1989-08-17	0.002371	140.368816428	3.2765098753	51.61025238	Impr. Grass	229	-6.02357460102622	3.94205324751815	S
1989-08-18	0.002878	202.120839834	5.93949624896	97.198257446	Arable	230	-5.83343568288307	3.95926745383919	S
1989-08-18	0.002959	147.542459615	4.10459509095	37.791748047	Arable	230	-5.80614748133423	3.95926745383919	S
1989-08-18	0.001358	226.468884864	6.84629831589	97.558746338	Less managed	230	-6.56558502124629	3.95926745383919	S
1989-08-18	0.001788	143.524305211	6.82817952577	86.2192535398	Less managed	230	-6.29907725504864	3.95926745383919	S
1989-08-18	0.003108	139.111066623	3.9890413075	109.5002594	Arable	230	-5.75781636314869	3.95926745383919	S
1989-08-19	0.001818	194.215963733	5.20637686403	85.641754151	Impr. Grass	231	-6.28288693917549	3.97648166016023	S
1989-08-18	0.001686	156.476538232	5.86692513508	186.0662612919	Arable	230	-6.35617166274398	3.95926745383919	S
1989-08-18	0.00194	145.314535054	6.13035523383	112.448997498	Arable	230	-6.21962064024574	3.95926745383919	S
1989-08-19	0.002499	188.432050351	7.27098679636	213.896499634	Impr. Grass	231	-5.97205415358816	3.97648166016023	S
1989-08-19	0.001419	258.778218145	8.46114013506	300.373016357	Less managed	231	-6.5231733817904	3.97648166016023	S
1989-08-17	0.00198	164.104204178	3.78843937069	20.01574707	Less managed	229	-6.19971948592844	3.94205324751815	S
1989-08-18	0.001307	198.500389735	6.82436220348	90.57850647	Arable	230	-6.60247889812941	3.95926745383919	S
1989-08-16	0.001408	287.668164103	6.74712061843	76.962020874	Arable	228	-6.53068964539567	3.92483904119711	S
1989-08-20	0.002502	144.842216492	5.33191576969	93.6390762324	Arable	232	-5.97087791349959	3.99369586648127	S
1989-08-17	0.001812	156.57639031	5.02644665215	163.24848938	Arable	229	-6.28610410012726	3.94205324751815	S
1989-08-17	0.002571	146.48879847	5.19393825274	79.6165008549	Impr. Grass	229	-5.94419935464087	3.94205324751815	S
1989-08-17	0.0016	155.161281366	4.07646888323	49.811256409	Arable	229	-6.40697999106965	3.94205324751815	S
1989-08-20	0.002088	131.581454998	6.82993733539	118.9183807375	Arable	232	-6.14788446637928	3.99369586648127	S
1989-08-16	0.00174	168.343002319	10.0887651443	0	Arable	228	-6.32553965912947	3.92483904119711	S
1989-08-17	0.00325	225	3	0	Impr. Grass	229	-5.7138328105097	3.94205324751815	S
1989-08-17	0.000836	156.493905909	7.34621387089	111.8957443238	Arable	229	-7.02879360735919	3.94205324751815	S
1989-08-16	0.001364	425.748852274	7.6409324928	287.918273925	Less managed	228	-6.56133271150776	3.92483904119711	S
1989-08-18	0.006368	382.005469446	6.80133935199	320.925231934	Impr. Grass	230	-5.04864873629447	3.95926745383919	S
1989-08-17	0.005856	463.246312651	4.47271903207	97.494476318	Less managed	229	-5.13178649566041	3.94205324751815	S
1989-08-18	0.000565	485.732406583	14.8943587387	626.281738281	Less managed	230	-7.39388829015776	3.95926745383919	S
1989-08-17	0.002433	265.678618978	3.63141641021	30.222991943	Less managed	229	-5.99828777245611	3.94205324751815	S
1989-08-17	0.000995	450.607728485	5.32865509103	195.254516602	Less managed	229	-6.86373839356536	3.94205324751815	S
1989-08-18	0.000822	609.226501465	34.8181724548	0	Less managed	230	-7.04472113405529	3.95926745383919	S
1989-08-18	0.001119	316.114388528	7.55968377723	174.775009155	Impr. Grass	230	-6.75160659649221	3.95926745383919	S
1989-08-16	0.000759	90	2	0	Less managed	228	-7.11971164090578	3.92483904119711	S
1989-08-17	0.000455	260.294904405	5.03756978028	108.190505981	Less managed	229	-7.59095212868891	3.94205324751815	S
1989-08-17	0.000743	407.318578868	5.28287972435	245.904022217	Less managed	229	-7.13968733632943	3.94205324751815	S
1989-08-16	0.000666	591.699208577	5.02339296043	44.149475097	Less managed	228	-7.24183039100363	3.92483904119711	S
1989-08-18	0.000942	253.945021934	6.54630941533	182.994750976	Impr. Grass	230	-6.9157874506794	3.95926745383919	S
1989-08-18	0.000778	323.568606383	5.63926750605	137.98474121	Impr. Grass	230	-7.09649740357901	3.95926745383919	S
1989-08-16	0.002274	452.642680835	9.95998341037	228.355957032	Less managed	228	-6.06446543999247	3.92483904119711	S
1989-08-16	0.000761	635.850857747	13.4761595083	236.974975586	Less managed	228	-7.11724250384886	3.92483904119711	S
1989-08-17	0.005375	373.244909668	4.12440226532	69.883728028	Less managed	229	-5.21673737955561	3.94205324751815	S
1989-08-16	0.001143	596.416950226	8.12421741088	217.794281006	Less managed	228	-6.73128413586636	3.92483904119711	S
1989-08-18	0.001541	516.087300421	15.7424699172	299.664001465	Less managed	230	-6.44339252962649	3.95926745383919	S
1989-08-18	0.000486	606.866833496	18.0373297862	349.643981934	Less managed	230	-7.53137639689347	3.95926745383919	S
1989-08-18	0.000752	481.193704313	14.0715441654	318.762237549	Less managed	230	-7.12840195009776	3.95926745383919	S
1989-08-17	0.000988	261.535848932	3.9076236958	44.59375	Less managed	229	-6.87045949423844	3.94205324751815	S
1989-08-17	0.000584	562.706712394	17.6806897953	303.9977417	Less managed	229	-7.36346160352705	3.94205324751815	S
1989-08-18	0.000657	370.014513323	11.2059448754	453.053985596	Less managed	230	-7.2544798920677	3.95926745383919	S
1989-08-17	0.001036	242.396807861	3.5630522407	41.40524292	Less managed	229	-6.82525405747039	3.94205324751815	S
1989-08-17	0.001435	313.05816584	4.11547259339	120.849517822	Less managed	229	-6.51234050672747	3.94205324751815	S
1989-08-17	0.001106	212.979659953	3.66050665735	101.746749878	Less managed	229	-6.76278950873195	3.94205324751815	S
1989-08-16	0.001155	383.471020114	4.18342410364	80.989990234	Less managed	228	-6.72127571203952	3.92483904119711	S
1989-08-18	0.000888	345.352350237	6.67973299117	380.480743409	Impr. Grass	230	-6.97176060895805	3.95926745383919	S
1989-08-17	0.00052	514.751850951	18.3967303693	536.207733154	Less managed	229	-7.46987419713568	3.94205324751815	S
1989-08-16	0.001382	509.633803402	7.91112509406	153.116943359	Less managed	228	-6.54868321044368	3.92483904119711	S
1989-08-18	0.000297	574.749551428	16.8570649487	287.728240967	Less managed	230	-7.96618577801742	3.95926745383919	S
1989-08-18	0.001068	484.321035268	17.457051203	272.937530517	Less managed	230	-6.79621390424923	3.95926745383919	S
1989-08-17	0.000824	245.949054127	4.73952040622	45.602508545	Less managed	229	-7.04243018230874	3.94205324751815	S
1989-08-17	0.002706	268.138977305	4.12294707348	45.873001099	Less managed	229	-5.89397492583073	3.94205324751815	S
1989-08-16	0.001457	50	3	0	Less managed	228	-6.49763435933778	3.92483904119711	S
1989-08-18	0.00251	342.717699118	8.77508720791	118.449493409	Impr. Grass	230	-5.96774802049067	3.95926745383919	S
1989-08-16	0.002413	544.758636475	5.1626748244	24.5227050780001	Less managed	228	-6.00637515984374	3.92483904119711	S
1989-08-16	0.000696	404.515370882	8.2132769548	261.440795898	Less managed	228	-7.20078495776051	3.92483904119711	S
1989-08-17	0.001776	291.6677767	6.84738483922	60.277770996	Less managed	229	-6.30562749680936	3.94205324751815	S
1989-08-19	0.001581	227.678304526	8.3956256761	77.323516846	Arable	231	-6.41856195534326	3.97648166016023	S
1989-08-22	0.00205	217.850449371	5.84783365925	102.936248779	Impr. Grass	234	-6.16581793425276	4.02812427912335	S
1989-08-19	0.002044	167.240318788	4.08407631298	85.691757203	Impr. Grass	231	-6.16867916653379	3.97648166016023	S
1989-08-19	0.002764	176.717323951	5.77317732047	166.9640045168	Impr. Grass	231	-5.87314832028994	3.97648166016023	S
1989-08-19	0.004876	208.64293457	6.26288903991	270.399734497	Arable	231	-5.31322797928379	3.97648166016023	S
1989-08-20	0.006762	165.994716724	6.02026900529	206.616661072	Arable	232	-4.9890695161817	3.99369586648127	S
1989-08-20	0.001987	92.4133173691	4.24727939597	85.6294021605	Arable	232	-6.19627714173747	3.99369586648127	S
1989-08-25	0.002516	101.728373894	2.18242746076	52.6979522706	Arable	237	-5.96540701278869	4.07976689808647	S
1989-08-20	0.003758	158.614799595	7.34113304205	143.953163147	Arable	232	-5.57065116205302	3.99369586648127	S
1989-08-25	0.002675	74.0547129831	2.57392012519	49.3306465148	Arable	237	-5.90528685086693	4.07976689808647	S
1989-08-25	0.002104	93.0206850481	3.01895420917	70.7158470154	Arable	237	-6.14042870024794	4.07976689808647	S
1989-08-20	0.00395	158.587871187	5.82301515938	214.7716293338	Arable	232	-5.52146091786225	3.99369586648127	S
1989-08-20	0.001637	186.886806351	6.08400823083	167.898681641	Arable	232	-6.38480347541831	3.99369586648127	S
1989-08-19	0.001264	159.77780778	5.80670661917	310.9455108638	Arable	231	-6.63467935891972	3.97648166016023	S
1989-08-23	0.001254	385.668798487	4.19433679093	127.75076294	Less managed	235	-6.64231881547768	4.04533848544439	S
1989-08-18	0.003872	102	3	0	Impr. Grass	230	-5.54115355120798	3.95926745383919	S
1989-08-23	0.00118	513.972734985	6.69522554874	221.809783936	Less managed	235	-6.70074110959781	4.04533848544439	S
1989-08-18	0.001626	252.777845046	10.5428988373	150.443237304	Impr. Grass	230	-6.39134527692225	3.95926745383919	S
1989-08-23	0.001353	426.371002197	5.48654332523	124.646270751	Less managed	235	-6.56914247786181	4.04533848544439	S
1989-08-18	0.000544	330.23936526	4.30768102407	71.565979004	Impr. Grass	230	-7.42863123860163	3.95926745383919	S
1989-08-23	0.000707	422.227154922	7.92558017969	92.97177124	Less managed	235	-7.18614730452683	4.04533848544439	S
1989-08-18	0.001049	299.041407832	9.20625444054	328.547531128	Impr. Grass	230	-6.81335460356065	3.95926745383919	S
1989-08-23	0.001074	383.78662714	6.39060297777	111.276519775	Less managed	235	-6.79086152751064	4.04533848544439	S
1989-08-18	0.001106	326.538711394	2.80563216002	90.53024292	Impr. Grass	230	-6.76278950873195	3.95926745383919	S
1989-08-18	0.001075	300.405677679	9.24693114201	245.866500855	Impr. Grass	230	-6.78997224332575	3.95926745383919	S
1989-08-24	0.001845	144.682215753	4.81848818243	135.6624984741	Arable	236	-6.26853644044775	4.06255269176543	S
1989-08-24	0.002517	152.118335215	4.89886704014	120.175247192	Arable	236	-5.96501737709313	4.06255269176543	S
1989-08-24	0.001045	188.307768809	11.8559972495	173.6382598875	Impr. Grass	236	-6.81700091571367	4.06255269176543	S
1989-08-24	0.00174	166.886538759	8.21928362511	240.571756363	Impr. Grass	236	-6.32553965912947	4.06255269176543	S
1989-08-25	0.003269	124.22587231	9.15063011646	163.0065078735	Impr. Grass	237	-5.7080917462443	4.07976689808647	S
1989-08-25	0.001563	144.428997817	9.51771378076	147.6619987483	Impr. Grass	237	-6.42965947983907	4.07976689808647	S
1989-08-24	0.001169	142.668291532	4.33383768862	68.206001282	Arable	236	-6.709724428483	4.06255269176543	S
1989-08-25	0.000868	218.425411416	7.78278499722	131.416503906	Arable	237	-6.99331316734378	4.07976689808647	S
1989-08-24	0.001105	197.981749573	2.65882125914	35.208251953	Arable	236	-6.76365493500838	4.06255269176543	S
1989-08-24	0.001033	139.580760662	2.9529783273	34.379257202	Impr. Grass	236	-6.82802031096328	4.06255269176543	S
1989-08-24	0.002028	67.3357670671	5.43855034295	64.7812538147	Impr. Grass	236	-6.1763493863051	4.06255269176543	S
1989-08-25	0.002368	94.8733739274	5.33180571095	172.9195022581	Impr. Grass	237	-6.02481452678954	4.07976689808647	S
1989-08-24	0.00161	147.21734629	5.30096906692	79.623260498	Arable	236	-6.40093767661368	4.06255269176543	S
1990-06-27	0.002035	104.379836122	5.57423772199	153.2446823121	Arable	178	-6.17298642373137	3.06412872514511	S
1989-08-25	0.001747	73.8693721041	4.90429513759	68.4047508237	Arable	237	-6.32163667118072	4.07976689808647	S
1989-08-24	0.001478	196.656040536	7.32456371605	201.6432571412	Impr. Grass	236	-6.48379558823781	4.06255269176543	S
1989-08-25	0.002058	149.699166055	3.2364491281	63.370506287	Impr. Grass	237	-6.16201564830302	4.07976689808647	S
1989-08-24	0.002057	127.581730603	4.18854781223	70.2067565922	Impr. Grass	236	-6.16249014416008	4.06255269176543	S
1989-08-24	0.000997	200	3	0	Less managed	236	-6.86182634709374	4.06255269176543	S
1989-08-23	0.004287	414.266474886	5.72807353847	84.287750245	Less managed	235	-5.44057241412891	4.04533848544439	S
1989-08-24	0.000735	436.545463295	2.7498610572	46.725738526	Less managed	236	-7.14982684018187	4.06255269176543	S
1989-08-24	0.000855	383.113238312	8.1274411914	75.105743408	Less managed	236	-7.00757561426435	4.06255269176543	S
1989-08-23	0.000876	399.646432495	4.26370738484	54.805480957	Less managed	235	-6.9846363233181	4.04533848544439	S
1989-08-24	0.002317	456.260003337	3.07301937075	167.320220948	Less managed	236	-6.04613194845029	4.06255269176543	S
1989-08-24	0.000891	503.424829739	5.38677339945	71.51449585	Less managed	236	-6.96856741837889	4.06255269176543	S
1989-08-24	0.001285	655.176576502	17.0032255229	219.936523438	Less managed	236	-6.61882398712992	4.06255269176543	S
1989-08-24	0.000903	625.822483608	16.8128775528	177.127990723	Less managed	236	-6.95589565431007	4.06255269176543	S
1989-08-24	0.001239	722.239362351	19.685980424	309.679748535	Less managed	236	-6.65388855502509	4.06255269176543	S
1989-08-24	0.002248	418.233363225	3.71318882245	36.380004883	Less managed	236	-6.07571609955557	4.06255269176543	S
1989-08-23	0.000657	505.701394975	5.10579221217	252.121734619	Less managed	235	-7.2544798920677	4.04533848544439	S
1989-08-24	0.002286	398.744175078	4.52528046707	112.138000488	Less managed	236	-6.05931521401616	4.06255269176543	S
1989-08-24	0.001405	419.033505614	4.57899059402	139.271514893	Less managed	236	-6.53274937835868	4.06255269176543	S
1990-06-29	0.002652	135.578084535	7.93596698423	135.7326049802	Less managed	180	-5.91376303944413	3.09855713778719	S
1990-06-29	0.014794	26.5639681151	1.40900658972	24.924984932	Arable	180	-4.21015953578379	3.09855713778719	S
1990-06-29	0.004964	35.2195727778	1.09149948576	24.4593544006	Impr. Grass	180	-5.29552127924604	3.09855713778719	S
1990-06-28	0.002003	256.338182349	5.1156579303	101.281356812	Impr. Grass	179	-6.18845314094534	3.08134293146615	S
1990-07-01	0.001393	195.558226022	13.4315579899	166.302490234	Less managed	182	-6.5410309991904	3.13298555042927	S
1990-06-28	0.001289	257.86569417	4.73863494405	94.866744995	Arable	179	-6.6158322122731	3.08134293146615	S
1990-06-29	0.004777	31.0083822257	2.51434624173	90.55897808076	Arable	180	-5.33353012230378	3.09855713778719	S
1990-06-29	0.010123	39.9268630851	1.72432640601	27.536693573	Arable	180	-4.58801812717053	3.09855713778719	S
1990-06-29	0.007725	33.3376642969	0.967919291958	112.0764160153	Arable	180	-4.85684182091684	3.09855713778719	S
1990-06-29	0.002046	80.8962050869	5.77262456409	162.0023040774	Less managed	180	-6.16772451252334	3.09855713778719	S
1990-06-29	0.001378	47.6096195977	0.924340092262	49.8526000977	Suburban	180	-6.55148041506474	3.09855713778719	S
1990-07-01	0.001602	151.590369223	4.86506346839	276.7114906315	Impr. Grass	182	-6.40576860388335	3.13298555042927	S
1990-06-29	0.009039	79.1435081506	4.29012352714	197.7842636112	Arable	180	-4.7006903878455	3.09855713778719	S
1990-06-29	0.002101	78.6910687169	3.69762797178	242.5325546264	Arable	180	-6.14182242869654	3.09855713778719	S
1990-06-28	0.00178	237.185997009	6.58167715099	104.401672363	Arable	179	-6.30343931212881	3.08134293146615	S
1990-06-23	0.001278	304.932533264	7.96464565396	35.695739747	Less managed	174	-6.62408122792789	2.99527189986095	S
1990-06-23	0.001235	317.362187487	6.37909122311	132.677276611	Less managed	174	-6.65699656063495	2.99527189986095	S
1990-07-01	0.001277	193.710597874	6.05157056743	127.26020813	Impr. Grass	182	-6.62483452363207	3.13298555042927	S
1990-06-30	0.001196	228.871339504	4.23065680487	73.50050354	Arable	181	-6.68781685861688	3.11577134410823	S
1990-06-30	0.001859	242.304678607	4.1698757082	110.606536865	Arable	181	-6.26117573423853	3.11577134410823	S
1990-07-01	0.00071	288.068876478	5.92024035965	135.836349488	Less managed	182	-7.1821921246839	3.13298555042927	S
1990-06-30	0.001605	230.919667562	4.51575339146	49.75314331	Arable	181	-6.40395427015311	3.11577134410823	S
1990-07-01	0.00152	217.435942232	11.8765049023	160.302108765	Less managed	182	-6.45667965962192	3.13298555042927	S
1990-07-01	0.0044	191.827781606	11.1908419448	167.017242432	Less managed	182	-5.41485118280399	3.13298555042927	S
1990-06-30	0.003495	217.028968811	5.7323374852	125.240585328	Less managed	181	-5.64221711899805	3.11577134410823	S
1990-06-24	0.00104	352.157886706	5.33546235791	102.357757568	Less managed	175	-6.82157758274109	3.01248610618199	S
1990-06-24	0.003197	315.811707043	4.72091005278	113.471008301	Less managed	175	-5.73002378586143	3.01248610618199	S
1990-06-23	0.016429	474.414448312	6.07588037679	79.434265136	Less managed	174	-4.10566843595354	2.99527189986095	S
1990-07-01	0.000633	283.591223052	7.82306929158	101.75	Less managed	182	-7.28901569839348	3.13298555042927	S
1990-06-30	0.000624	365.088535563	9.93306624095	127.181762695	Less managed	181	-7.30228044705197	3.11577134410823	S
1990-06-30	0.000876	488.890528969	6.96368175	124.96875	Less managed	181	-6.9846363233181	3.11577134410823	S
1990-06-30	0.000881	452.239111131	11.7524642021	165.436248779	Less managed	181	-6.97925128068721	3.11577134410823	S
1990-07-12	0.003902	55.8080933995	5.23338041893	87.7167491917	Arable	193	-5.53353349909652	3.32234181996071	S
1990-07-12	0.002348	84.8474904523	7.39999981869	112.5785064695	Impr. Grass	193	-6.03312022237682	3.32234181996071	S
1990-07-12	0.003762	85.586146463	4.96881110136	76.5637550355	Impr. Grass	193	-5.56960129319018	3.32234181996071	S
1990-07-11	0.001195	214.764129639	11.8884957989	174.968231201	Less managed	192	-6.68861974906547	3.30512761363967	S
1990-07-11	0.001188	259.952428951	14.3225777436	269.907501221	Impr. Grass	192	-6.69425810471973	3.30512761363967	S
1990-07-10	0.002905	61.4969282274	3.76836482968	34.7579994201	Arable	191	-5.82425662812408	3.28791340731863	S
1990-07-10	0.003373	106.220363173	3.37095216904	26.680999756	Impr. Grass	191	-5.67723791943409	3.28791340731863	S
1990-07-10	0.002495	93.5214667002	5.15720969786	56.1770019529	Arable	191	-5.97362462897965	3.28791340731863	S
1990-07-12	0.005686	112.711803539	5.15496463944	105.2919921878	Impr. Grass	193	-5.16099317568482	3.32234181996071	S
1990-07-10	0.009268	49.3757743364	2.83699257653	30.6267547607	Arable	191	-4.67580726558753	3.28791340731863	S
1990-07-10	0.00121	136.70255863	5.89441441929	91.3197479245	Arable	191	-6.67664355801875	3.28791340731863	S
1990-07-10	0.001	75.9452945845	3.95954862024	77.4867515564	Impr. Grass	191	-6.85896511481271	3.28791340731863	S
1990-07-10	0.003014	47.0530014038	2.96633410454	0	Arable	191	-5.78803402710379	3.28791340731863	S
1990-07-11	0.001177	311.046046767	11.6835504493	374.54447937	Less managed	192	-6.70318311325336	3.30512761363967	S
1990-07-12	0.001857	72.0729466756	6.88191398462	64.8187484741	Less managed	193	-6.26222395236385	3.32234181996071	S
1990-07-13	0.002046	112.513650268	6.86466002601	100.6257476808	Impr. Grass	194	-6.16772451252334	3.33955602628175	S
1990-07-10	0.001596	48.6836991571	2.8590359195	54.0842437744	Arable	191	-6.40940717672726	3.28791340731863	S
1990-07-11	0.000661	416.586345685	7.60046936116	189.688995361	Less managed	192	-7.24883812816103	3.30512761363967	S
1990-07-11	0.0015	332.57816512	14.866727241	274.385513305	Less managed	192	-6.46950034805098	3.30512761363967	S
1990-07-11	0.001087	337.51720497	11.2994867893	330.863006592	Less managed	192	-6.77936206421374	3.30512761363967	S
1990-07-12	0.002158	119.662493367	7.71711581272	78.2877502445	Impr. Grass	193	-6.11566815056729	3.32234181996071	S
1990-07-10	0.001893	147.250446728	10.0711418951	137.5937614439	Impr. Grass	191	-6.24352210858683	3.28791340731863	S
1990-07-10	0.003019	134.037507799	5.11973621448	44.776000977	Impr. Grass	191	-5.78640350334454	3.28791340731863	S
1990-07-11	0.001923	410.916293422	10.5653609195	372.48777771	Less managed	192	-6.22820005194166	3.30512761363967	S
1990-07-12	0.002346	53.4521659048	4.03730947595	36.8222427368	Impr. Grass	193	-6.03395459872893	3.32234181996071	S
1990-07-10	0.001702	144.543647965	8.44722209096	124.3455123902	Arable	191	-6.34699728646794	3.28791340731863	S
1990-07-11	0.000916	442.254149794	10.5731658842	257.100738525	Less managed	192	-6.94234672375176	3.30512761363967	S
1990-07-11	0.004752	286.196720304	14.3747433251	308.214996338	Less managed	192	-5.33872278118308	3.30512761363967	S
1990-07-10	0.002005	90.3557029945	3.60612260399	48.3730010986	Impr. Grass	191	-6.18747943103394	3.28791340731863	S
1990-07-10	0.002407	73.100386772	4.22538566304	85.1197509767	Impr. Grass	191	-6.00881418544309	3.28791340731863	S
1990-07-10	0.001431	82.5655514399	2.87548346072	25.1812515259	Impr. Grass	191	-6.51503774369648	3.28791340731863	S
1990-07-13	0.002185	128.450511742	8.47831119895	89.9167556761	Less managed	194	-6.1035140509166	3.33955602628175	S
1990-07-10	0.003134	136.267429255	7.45329451319	116.5432510376	Less managed	191	-5.749617011	3.28791340731863	S
1990-07-01	0.000832	363.834223842	9.49549090604	222.513015747	Less managed	182	-7.03331850195748	3.13298555042927	S
1990-07-01	0.00116	373.690851358	5.09682324414	146.461517334	Less managed	182	-6.71713491937349	3.13298555042927	S
1990-07-01	0.00203	398.602282104	3.89086464226	55.454742432	Less managed	182	-6.17538738526891	3.13298555042927	S
1990-07-01	0.001801	321.244557699	9.59949935642	150.438232422	Impr. Grass	182	-6.29202924539078	3.13298555042927	S
1990-07-01	0.001064	349.148421016	8.78617212698	182.448760987	Less managed	182	-6.79979813747704	3.13298555042927	S
1990-07-01	0.001809	399.356308457	8.52809641765	168.249511718	Less managed	182	-6.28771657024283	3.13298555042927	S
1990-07-01	0.001035	386.358337789	7.17409959692	180.002990723	Less managed	182	-6.82617529198971	3.13298555042927	S
1990-07-01	0.002193	294.633189132	4.85532789405	88.18548584	Impr. Grass	182	-6.09994102344407	3.13298555042927	S
1990-07-01	0.001055	303.202269287	5.1723803854	43.245239258	Less managed	182	-6.80790994401242	3.13298555042927	S
1990-07-12	0.002	127.696190749	7.38604982832	92.3340034488	Impr. Grass	193	-6.18991548583182	3.32234181996071	S
1990-07-12	0.002234	86.0383166103	5.94513238876	59.7994995117	Arable	193	-6.08182698718837	3.32234181996071	S
1990-07-12	0.001404	143.963930117	9.07272723677	193.5067367554	Impr. Grass	193	-6.53343689987081	3.32234181996071	S
1990-07-12	0.001169	108.34804654	9.7034498805	128.0715026856	Impr. Grass	193	-6.709724428483	3.32234181996071	S
1990-07-12	0.002733	88.9141123718	6.96063618344	155.3315048218	Impr. Grass	193	-5.88422579643838	3.32234181996071	S
1990-07-12	0.001538	147.207553798	12.1562645764	169.5825042723	Less managed	193	-6.44527991615719	3.32234181996071	S
1990-07-12	0.001724	92.2396383168	7.72548753281	123.4689941409	Impr. Grass	193	-6.33451839509475	3.32234181996071	S
1990-07-13	0.003745	51.9882021402	5.49219729847	113.9650001524	Impr. Grass	194	-5.57407086813454	3.33955602628175	S
1990-07-12	0.001197	109.374376273	9.44973461698	151.9512557987	Less managed	193	-6.68701461228424	3.32234181996071	S
1990-07-12	0.001701	98.0475284576	7.66232176508	83.5057449342	Arable	193	-6.34756822567842	3.32234181996071	S
1990-07-12	0.002591	136.526619533	8.97371052648	206.9982376099	Impr. Grass	193	-5.93659764566714	3.32234181996071	S
1990-07-12	0.002283	80.9702071213	10.6295590982	92.0839996334	Impr. Grass	193	-6.06060028594284	3.32234181996071	S
1990-07-12	0.002039	162.461667796	9.16570602675	146.5492553716	Arable	193	-6.17106979640771	3.32234181996071	S
1990-07-18	0.001904	306.461444357	5.20014355494	90.426239013	Less managed	199	-6.23787672536155	3.42562705788695	S
1990-07-12	0.001827	82.4669163174	8.33005778525	85.2017517093	Arable	193	-6.27808052137777	3.32234181996071	S
1990-07-12	0.002165	86.7523632255	7.12359952286	96.8180007937	Impr. Grass	193	-6.11250287548504	3.32234181996071	S
1990-07-10	0.002631	65.2933244391	3.92564036394	27.0202484131	Arable	191	-5.92156541972831	3.28791340731863	S
1990-07-10	0.002038	71.649865036	5.1489304626	55.1142539982	Arable	191	-6.17154860896174	3.28791340731863	S
1990-07-17	0.017322	346.482496612	7.54437190538	154.546234131	Impr. Grass	198	-4.05289556430956	3.40841285156591	S
1990-07-17	0.001417	367.342777069	5.0199091622	131.508758545	Less managed	198	-6.52453577982129	3.40841285156591	S
1990-07-18	0.000696	279.778221119	6.68039359199	186.860748291	Impr. Grass	199	-7.20078495776051	3.42562705788695	S
1990-07-10	0.001943	59.1193743509	3.62762480517	43.3127479553	Impr. Grass	191	-6.21811423775148	3.28791340731863	S
1990-06-30	0.002609	68.1791535202	4.31101049209	50.3502502441	Arable	181	-5.92980516672125	3.11577134410823	S
1990-07-10	0.001799	93.1785865057	4.47486737441	38.3970031742	Arable	191	-6.29311032657715	3.28791340731863	S
1990-07-10	0.001841	79.1946652935	6.09181398826	49.8889999392	Impr. Grass	191	-6.27064948930582	3.28791340731863	S
1990-07-12	0.005844	86.4394717927	3.32588345811	58.9067535402	Arable	193	-5.13382039466663	3.32234181996071	S
1990-07-10	0.001975	52.5548995413	6.37076061564	71.6644973755	Arable	191	-6.20218557842363	3.28791340731863	S
1990-07-10	0.00178	119.322681219	5.54550140494	101.0119934085	Impr. Grass	191	-6.30343931212881	3.28791340731863	S
1990-07-10	0.002053	81.9218511079	5.8647351386	54.3154983525	Arable	191	-6.16439038226157	3.28791340731863	S
1990-07-10	0.001885	106.811448097	11.2200128128	136.2295112605	Less managed	191	-6.24764795250039	3.28791340731863	S
1990-07-12	0.004394	153.545441848	4.89677240298	35.416503907	Less managed	193	-5.41620040720475	3.32234181996071	S
1990-07-11	0.00205	75.4551694863	3.60697525841	52.5102539062	Arable	192	-6.16581793425276	3.30512761363967	S
1990-07-12	0.002639	106.48635967	5.0907456641	82.5112419124	Impr. Grass	193	-5.91858590169541	3.32234181996071	S
1990-07-12	0.002181	166.496880757	4.92358854698	80.125747681	Impr. Grass	193	-6.10530536353174	3.32234181996071	S
1990-07-12	0.001861	249.786437382	9.1110861409	348.749740601	Impr. Grass	193	-6.260128613724	3.32234181996071	S
1990-07-10	0.003929	82.74561833	5.9047652366	125.8625106811	Less managed	191	-5.52672474753735	3.28791340731863	S
1990-07-10	0.002924	109.676713158	4.46659417275	37.6044921873	Arable	191	-5.81784743094417	3.28791340731863	S
1990-07-10	0.002831	69.8674446555	3.61905141613	48.7217483523	Impr. Grass	191	-5.84961782287975	3.28791340731863	S
1990-07-10	0.002557	111.028341566	7.64252419178	83.1424942021	Less managed	191	-5.94955514403077	3.28791340731863	S
1990-07-11	0.009131	69.9844134531	2.97317503742	34.6785011292	Arable	192	-4.69061914782057	3.30512761363967	S
1990-07-12	0.001973	110.291513991	5.2148108135	109.2485046385	Arable	193	-6.20317372079653	3.32234181996071	S
1990-07-12	0.00203	148.370700198	5.01342166022	119.8430099483	Arable	193	-6.17538738526891	3.32234181996071	S
1990-07-11	0.001438	94.5794236467	3.06709810581	35.0510025021	Impr. Grass	192	-6.51032234257124	3.30512761363967	S
1990-07-11	0.002063	84.9950404312	4.65905597099	52.3460083011	Arable	192	-6.15964654034822	3.30512761363967	S
1990-07-11	0.003791	87.4172362073	2.59751793357	47.3015022273	Arable	192	-5.56202252961837	3.30512761363967	S
1990-07-11	0.003197	76.641670327	3.09368772495	64.4232521058	Impr. Grass	192	-5.73002378586143	3.30512761363967	S
1990-07-12	0.001337	166.250451401	4.22111387798	76.520996093	Arable	193	-6.58061213764944	3.32234181996071	S
1990-07-11	0.008766	75.9748338224	2.5667616725	51.5629997256	Arable	192	-4.73118702657158	3.30512761363967	S
1990-07-12	0.002396	175.621142546	5.200367279	281.058258056	Impr. Grass	193	-6.01330124171716	3.32234181996071	S
1990-07-11	0.003643	74.2842304523	5.1813566742	60.424751282	Impr. Grass	192	-5.60131614311171	3.30512761363967	S
1990-07-12	0.00207	204.450549107	6.57014206032	242.238250732	Arable	193	-6.15633919029822	3.32234181996071	S
1990-07-11	0.00696	77.9233935879	3.09530838342	58.6887512208	Arable	192	-4.96041757793564	3.30512761363967	S
1990-07-10	0.002167	91.2247789085	6.61604270724	95.1225051878	Less managed	191	-6.11160034834796	3.28791340731863	S
1990-07-11	0.00217	79.688612048	2.81186818621	42.723003387	Arable	192	-6.11024808309795	3.30512761363967	S
1990-07-10	0.003442	87.7273755096	3.10401800206	43.61075592	Impr. Grass	191	-5.65728064100478	3.28791340731863	S
1990-07-10	0.001963	102.289419711	8.28511817815	159.9572525023	Impr. Grass	191	-6.20812913232448	3.28791340731863	S
1990-07-10	0.00262	88.6879384639	2.37243654746	35.4982528683	Arable	191	-5.92567680656998	3.28791340731863	S
1990-07-10	0.001832	57.468970454	5.50138438302	78.128002167	Arable	191	-6.27542023781895	3.28791340731863	S
1990-07-11	0.001541	86.1279480221	3.12785559891	52.9052505496	Arable	192	-6.44339252962649	3.30512761363967	S
1990-07-18	0.001895	247.417059357	8.08446326765	246.516754151	Impr. Grass	199	-6.24249330191173	3.42562705788695	S
1990-07-18	0.000376	302.981079323	6.37854172311	85.707275391	Less managed	199	-7.7610712116949	3.42562705788695	S
1990-07-18	0.001399	340	3	0	Impr. Grass	199	-6.53688161564359	3.42562705788695	S
1990-07-18	0.008947	323.266387353	4.31780251703	117.247497559	Less managed	199	-4.71086409054716	3.42562705788695	S
1990-07-19	0.003274	170.298457705	4.53633633564	52.799499512	Impr. Grass	200	-5.70658640198894	3.44284126420799	S
1990-07-17	0.001298	297.95664444	4.65689025931	87.329254151	Less managed	198	-6.60913326649202	3.40841285156591	S
1990-07-19	0.001317	228.44282358	6.86830984453	115.95425415	Impr. Grass	200	-6.59513672124032	3.44284126420799	S
1990-07-19	0.001207	142.397506754	7.78778689681	133.2670059201	Impr. Grass	200	-6.67902734937403	3.44284126420799	S
1990-07-18	0.002414	315.882112821	7.53877252785	138.884765625	Impr. Grass	199	-6.00596923331086	3.42562705788695	S
1990-07-19	0.001378	175.503663942	9.44024912838	216.2882537845	Impr. Grass	200	-6.55148041506474	3.44284126420799	S
1990-07-17	0.00773	306.564054781	5.20723613499	117.880767822	Impr. Grass	198	-4.85619894079184	3.40841285156591	S
1990-07-19	0.005202	208.643919264	3.28441964143	35.782745361	Impr. Grass	200	-5.24914632254159	3.44284126420799	S
1990-07-18	0.005868	296.49407959	8.93713792617	67.919250488	Less managed	199	-5.12975672500412	3.42562705788695	S
1990-07-19	0.001245	193.959557819	8.48915861612	183.2312469479	Less managed	200	-6.64924458383064	3.44284126420799	S
1990-07-17	0.00106	363.863536209	8.11162373755	139.069000244	Impr. Grass	198	-6.80339526365789	3.40841285156591	S
1990-07-18	0.003939	307.235308355	5.69238114448	193.277008056	Less managed	199	-5.52421470605887	3.42562705788695	S
1990-07-19	0.001198	291.433311886	4.21972315841	63.702484131	Impr. Grass	200	-6.6862130090349	3.44284126420799	S
1990-07-19	0.00071	297.072809965	6.9221056813	192.04623413	Less managed	200	-7.1821921246839	3.44284126420799	S
1990-07-18	0.001871	243.512017732	7.42597665638	243.89025116	Impr. Grass	199	-6.25490939519572	3.42562705788695	S
1990-07-14	0.001928	116.496523685	6.27811369073	84.954994202	Impr. Grass	195	-6.22566904578162	3.35677023260279	S
1990-07-13	0.001764	138.076163911	7.24833495121	88.5920104985	Impr. Grass	194	-6.31222092728919	3.33955602628175	S
1990-07-14	0.001332	208.553262505	7.71206104532	174.059883117	Less managed	195	-6.58422355363666	3.35677023260279	S
1990-07-15	0.001281	153.431706276	8.97836971226	178.9653472899	Arable	196	-6.62182473956916	3.37398443892383	S
1990-07-14	0.001541	141.154129846	5.26216035868	77.768005372	Less managed	195	-6.44339252962649	3.35677023260279	S
1990-07-14	0.001786	180.557550767	4.71845012973	96.642745971	Arable	195	-6.30016598678384	3.35677023260279	S
1990-07-14	0.0013	210.845305125	13.7926555534	245.977005005	Less managed	195	-6.6076506865318	3.35677023260279	S
1990-07-13	0.000887	185.189891506	10.7723835455	295.9517440794	Impr. Grass	194	-6.97282727572585	3.33955602628175	S
1990-07-14	0.001426	121.904069099	4.95340579057	56.7872543339	Impr. Grass	195	-6.51841955280386	3.35677023260279	S
1990-07-14	0.001211	128.640964108	4.89281752048	97.95526123	Arable	195	-6.67585022199935	3.35677023260279	S
1990-07-14	0.000909	162.21352005	12.0416809983	114.235000611	Less managed	195	-6.94961948308084	3.35677023260279	S
1990-07-13	0.016834	147.75944955	4.3952479107	61.434005737	Impr. Grass	194	-4.08138885106188	3.33955602628175	S
1990-07-13	0.002952	118.828208589	6.65133627009	78.2470092771	Impr. Grass	194	-5.80847654577087	3.33955602628175	S
1990-07-13	0.00115	155.86888615	4.77822202383	118.606246948	Impr. Grass	194	-6.72543372218818	3.33955602628175	S
1990-07-13	0.001368	138.942996677	5.14005153613	99.4600067139	Impr. Grass	194	-6.5585078508722	3.33955602628175	S
1990-07-14	0.002328	175.534393897	5.61523733489	80.301254273	Impr. Grass	195	-6.04149548071355	3.35677023260279	S
1990-07-14	0.001374	221.287519689	8.67666828319	178.747985839	Impr. Grass	195	-6.55428546599235	3.35677023260279	S
1990-07-14	0.001598	120.100610331	6.06048491542	100.4232635496	Less managed	195	-6.40819284749486	3.35677023260279	S
1990-07-14	0.006834	131.416653727	6.1641793644	85.4479980469	Impr. Grass	195	-4.97855540063284	3.35677023260279	S
1990-07-14	0.00075	313.931809743	10.2837600296	214.472991943	Impr. Grass	195	-7.13089883029635	3.35677023260279	S
1990-07-14	0.001774	190.658986945	4.08677846193	63.998001098	Arable	195	-6.30672338733	3.35677023260279	S
1990-07-13	0.001546	163.315581114	5.33883173872	87.529243469	Arable	194	-6.44025477995452	3.33955602628175	S
1990-07-14	0.00129	140.987958272	6.03133602937	11.529998779	Arable	195	-6.61508566501932	3.35677023260279	S
1990-07-15	0.002336	146.924162403	8.03974474072	189.2244796754	Arable	196	-6.03813695530641	3.37398443892383	S
1990-07-13	0.005995	64.0479519184	4.21670789902	38.1322555542	Arable	194	-5.10852379491538	3.33955602628175	S
1990-07-14	0.002378	131.478010426	3.98971337339	60.386238098	Arable	195	-6.02068740578489	3.35677023260279	S
1990-07-14	0.001505	81.1272231367	2.97584101042	69.4473495482	Arable	195	-6.46627973335094	3.35677023260279	S
1990-07-13	0.002267	99.9924962218	6.22581488818	61.6512527467	Impr. Grass	194	-6.0674820335319	3.33955602628175	S
1990-07-13	0.002775	71.7777012416	2.65868344761	13.675994873	Arable	194	-5.86924691438373	3.33955602628175	S
1990-07-14	0.002276	271.060723396	11.5746376406	244.7525177	Impr. Grass	195	-6.06360522488566	3.35677023260279	S
1990-07-14	0.002535	244.935256958	10.4433526993	0	Arable	195	-5.95802977102174	3.35677023260279	S
1990-07-14	0.002664	114.402353391	4.37938504788	75.6027603154	Arable	195	-5.90933171756946	3.35677023260279	S
1990-07-14	0.001506	171.851974487	4.02417143797	55.525253296	Arable	195	-6.46563685322594	3.35677023260279	S
1990-07-13	0.002938	106.92576425	5.18519939758	90.7370071413	Arable	194	-5.81315101171157	3.33955602628175	S
1990-07-14	0.000932	289.66389673	9.75181340873	193.536254882	Impr. Grass	195	-6.92591924960981	3.35677023260279	S
1990-07-14	0.001633	136.580281652	6.15510202418	78.341262817	Arable	195	-6.38717736377347	3.35677023260279	S
1990-07-14	0.001198	157.82136007	8.36689107343	253.8417510986	Arable	195	-6.6862130090349	3.35677023260279	S
1990-07-13	0.003997	129.57547327	4.17998019868	38.763496399	Impr. Grass	194	-5.50977941308841	3.33955602628175	S
1990-07-14	0.002319	146.594642855	6.16586330308	90.6692504885	Arable	195	-6.04528735380549	3.35677023260279	S
1990-07-13	0.001358	211.135479452	8.02703609031	301.882019043	Arable	194	-6.56558502124629	3.33955602628175	S
1990-07-13	0.003496	101.10611219	5.54636532214	118.3250007632	Impr. Grass	194	-5.64193507133012	3.33955602628175	S
1990-07-14	0.001895	81.3987830741	5.56807925467	63.2737464909	Impr. Grass	195	-6.24249330191173	3.35677023260279	S
1990-07-13	0.001655	101.134026568	4.72424896285	112.2677574163	Impr. Grass	194	-6.37419016824666	3.33955602628175	S
1990-07-13	0.002024	89.7069770672	5.78410341563	59.2962493896	Impr. Grass	194	-6.1782761691748	3.33955602628175	S
1990-07-18	0.001282	169.083826749	11.0822898363	172.4450073246	Impr. Grass	199	-6.62107370686394	3.42562705788695	S
1990-07-18	0.002078	96.2230153879	6.17800549045	55.6277465823	Impr. Grass	199	-6.15257270750274	3.42562705788695	S
1990-07-18	0.001394	167.959531435	9.26154830338	171.9989929202	Arable	199	-6.5403382385115	3.42562705788695	S
1990-07-18	0.001367	131.384080273	8.75073599007	151.9595031742	Arable	199	-6.55921331827359	3.42562705788695	S
1990-07-15	0.001953	116.720394308	5.56416819712	132.2900161744	Arable	196	-6.21310922229846	3.37398443892383	S
1990-07-15	0.001076	184.034859586	8.1249406802	132.82925415	Less managed	196	-6.78908374926464	3.37398443892383	S
1990-07-18	0.002696	77.1203997294	6.65914479494	37.6599998474	Arable	199	-5.89760997163636	3.42562705788695	S
1990-07-18	0.00168	124.027419146	5.55380597185	158.2902526852	Impr. Grass	199	-6.35963387047245	3.42562705788695	S
1990-07-14	0.001685	188.177165333	5.78121095503	142.195495606	Arable	195	-6.35674786558331	3.35677023260279	S
1990-07-18	0.012014	81.8555852391	5.76403798353	68.8770065304	Arable	199	-4.41752946771654	3.42562705788695	S
1990-07-15	0.001512	198.69787192	4.76425784552	119.555503845	Impr. Grass	196	-6.46178822756464	3.37398443892383	S
1990-07-14	0.001199	170.220438461	6.29115931564	209.2974967959	Arable	195	-6.6854120478387	3.35677023260279	S
1990-07-18	0.001943	110.387893018	7.82007875588	170.3437500003	Arable	199	-6.21811423775148	3.42562705788695	S
1990-07-18	0.001862	107.83207105	7.66179956694	96.5120086671	Impr. Grass	199	-6.25960546435293	3.42562705788695	S
1990-07-18	0.00101	199.059194254	11.6234200569	126.449501038	Less managed	199	-6.84948637085816	3.42562705788695	S
1990-07-15	0.001947	109.425292642	3.51668425101	67.8094787596	Arable	196	-6.21610922454846	3.37398443892383	S
1990-07-20	0.001735	104.396691028	5.65779319327	116.3376350402	Arable	201	-6.32833686375053	3.46005547052903	S
1990-07-14	0.002048	183.03456341	5.35546995748	101.105499267	Arable	195	-6.16677076900803	3.35677023260279	S
1990-07-20	0.001495	130.44305475	4.37555568313	85.9824295042	Arable	201	-6.47273136863243	3.46005547052903	S
1990-07-20	0.011429	59.1125282564	2.71816089141	45.3386688232	Arable	201	-4.46723599989878	3.46005547052903	S
1990-07-20	0.002839	62.1250339146	1.76871143749	23.8354644776	Arable	201	-5.84684485749804	3.46005547052903	S
1990-07-19	0.002754	61.002064789	4.58325716245	171.199077606	Arable	200	-5.87670830980979	3.44284126420799	S
1990-07-19	0.00125	197.179740884	5.07847068127	84.751266479	Suburban	200	-6.64539101451465	3.44284126420799	S
1990-07-19	0.001217	223.178596415	3.89799265515	37.262512207	Less managed	200	-6.67110337764313	3.44284126420799	S
1990-07-19	0.001567	200.616893864	7.90647138297	166.98348999	Arable	200	-6.42718269838717	3.44284126420799	S
1990-07-19	0.000916	161.170021385	4.88104932911	97.136833191	Arable	200	-6.94234672375176	3.44284126420799	S
1990-07-19	0.001733	210.65979443	5.1687656873	77.545257568	Less managed	200	-6.32945794010113	3.44284126420799	S
1990-07-19	0.001828	137.331193839	10.5824769006	191.0870018006	Impr. Grass	200	-6.27754789819607	3.44284126420799	S
1990-07-20	0.00285	138.290891239	7.70303725132	136.1808166506	Arable	201	-5.84304454198971	3.46005547052903	S
1990-07-19	0.001743	69.2005325815	6.24772918224	67.5527496335	Arable	200	-6.32386508435914	3.44284126420799	S
1990-07-21	0.00176	79.9309219837	4.538856709	40.2857513428	Impr. Grass	202	-6.3144284337044	3.47726967685007	S
1990-07-19	0.002852	179.700018891	4.38937322955	60.209259033	Arable	200	-5.84235512452014	3.44284126420799	S
1990-07-20	0.005162	77.5533562943	4.11505105919	55.9367599485	Arable	201	-5.25679161971954	3.46005547052903	S
1990-07-20	0.002347	154.102635701	6.81960443656	65.143188476	Arable	201	-6.03353732352989	3.46005547052903	S
1990-07-20	0.001282	155.726055199	5.16436402722	117.8620758054	Arable	201	-6.62107370686394	3.46005547052903	S
1990-07-20	0.002408	105.445531513	3.84382948373	77.3716278075	Arable	201	-6.00840726783829	3.46005547052903	S
1990-07-19	8e-06	254.751704439	5.54793931576	121.576004028	Less managed	200	-9.75506754741786	3.44284126420799	S
1990-07-20	0.002429	113.2774311	7.79697077583	118.2821502689	Arable	201	-5.99990002592908	3.46005547052903	S
1990-07-19	0.002369	244.222886949	3.11352370862	49.328994751	Impr. Grass	200	-6.02440104735425	3.44284126420799	S
1990-07-20	0.001989	96.2647717963	4.53727458026	120.2798461911	Arable	201	-6.19529578738982	3.46005547052903	S
1990-07-20	0.001531	116.353835022	4.04210649204	96.7760848998	Arable	201	-6.4496977207548	3.46005547052903	S
1990-07-20	0.003143	87.2300644349	2.89659120807	62.3919677733	Arable	201	-5.74679436524949	3.46005547052903	S
1990-07-20	0.003945	60.9202749301	2.42120716855	34.9791870118	Arable	201	-5.5227116997639	3.46005547052903	S
1990-07-20	0.002012	129.104986562	3.53952636935	59.944534302	Arable	201	-6.18407889338737	3.46005547052903	S
1990-07-19	0.002324	221.86993493	6.65092698181	79.96975708	Impr. Grass	200	-6.04317898279466	3.44284126420799	S
1990-07-19	0.005352	202.536866071	7.42694781865	133.896697998	Suburban	200	-5.22098602361171	3.44284126420799	S
1990-07-19	0.001818	168.200039636	8.63568678228	210.5508117672	Arable	200	-6.28288693917549	3.44284126420799	S
1990-07-21	0.001434	193.80668508	8.60648358513	165.8972549436	Impr. Grass	202	-6.51301413423695	3.47726967685007	S
1990-07-21	0.002058	129.462615089	3.57237869818	44.025253296	Impr. Grass	202	-6.16201564830302	3.47726967685007	S
1990-07-21	0.002225	108.91184857	4.96577038263	54.1104965215	Arable	202	-6.08577522657922	3.47726967685007	S
1990-07-21	0.000801	240.189521053	4.02120232863	71.214477539	Less managed	202	-7.0690984293909	3.47726967685007	S
1990-07-21	0.005768	113.063317435	6.61907400309	52.7145004269	Arable	202	-5.14679871890913	3.47726967685007	S
1990-07-21	0.001672	120.119035617	4.994054169	67.1540069582	Impr. Grass	202	-6.3642688729766	3.47726967685007	S
1990-07-21	0.002147	230.608692341	3.55010128048	51.502258301	Impr. Grass	202	-6.12066248557966	3.47726967685007	S
1990-07-21	0.002519	124.777657868	7.60109469441	199.8519935608	Impr. Grass	202	-5.96423856085439	3.47726967685007	S
1990-07-21	0.000974	149.846885179	6.28483031141	139.184005737	Impr. Grass	202	-6.88403875236482	3.47726967685007	S
1990-07-21	0.002514	135.379992072	6.80066308135	184.7184982303	Impr. Grass	202	-5.96618673992371	3.47726967685007	S
1990-07-21	0.00214	93.3247822738	5.36648794121	111.4045066836	Arable	202	-6.12385373515373	3.47726967685007	S
1990-07-21	0.002491	117.894121631	4.86125637145	119.0572509767	Impr. Grass	202	-5.97519757464411	3.47726967685007	S
1994-07-30	0.011636	30.3567062859	1.0328866836	13.6052474976	Arable	211	-4.44936373484989	3.63219753373943	S
1994-07-30	0.006601	15.7639897925	1.35721226503	25.43050003054	Arable	211	-5.01298805967985	3.63219753373943	S
1994-08-06	0.00391	35.6408478955	1.45891709809	17.2980003357	Arable	218	-5.53151125371575	3.75269697798671	S
1994-08-08	0.00181	86.8269264111	3.12765166779	102.7149963378	Impr. Grass	220	-6.28717879125703	3.78712539062879	S
1994-08-08	0.001242	123.102822361	2.70773579773	86.676750183	Impr. Grass	220	-6.65156387362173	3.78712539062879	S
1994-08-08	0.000872	122.450984625	3.31098433958	91.1774978639	Impr. Grass	220	-6.98896533440768	3.78712539062879	S
1994-08-08	0.001755	73.5346329891	1.94267393699	59.033996582	Arable	220	-6.31719468719729	3.78712539062879	S
1994-08-08	0.001747	90.9545267226	2.9861290857	93.7939949035	Impr. Grass	220	-6.32163667118072	3.78712539062879	S
1994-08-08	0.00129	76.2336812453	2.25086718081	63.4612541198	Arable	220	-6.61508566501932	3.78712539062879	S
1994-08-15	0.001737	224.817800085	1.83946706467	79.118240356	Impr. Grass	227	-6.32721704280485	3.90762483487607	S
1994-08-16	0.001999	223.89830908	6.07244914659	103.340484619	Impr. Grass	228	-6.19040340972537	3.92483904119711	S
1994-08-12	0.010588	2.32773005198	0.541427917706	12.365250349051	Arable	224	-4.54332278266201	3.85598221591295	S
1994-08-10	0.008443	3.85574206284	0.688698192704	9.362500071508	Arable	222	-4.76851298418427	3.82155380327087	S
1994-08-12	0.003796	7.12349007625	0.63636846718	9.55174994468	Arable	224	-5.56072163181555	3.85598221591295	S
1994-08-12	0.012017	2.99686666595	0.261339356005	2.27875018119	Arable	224	-4.41728082489067	3.85598221591295	S
1994-08-11	0.003185	0.973027521112	0.369175930191	4.182249814273	Arable	223	-5.73372635102927	3.83876800959191	S
1994-08-12	0.006012	6.60366669679	0.361077009676	8.88299989701	Arable	224	-5.10571550034653	3.85598221591295	S
1994-08-12	0.01594	2.09901162185	0.511188059287	3.516000092031	Arable	224	-4.13579175213627	3.85598221591295	S
1994-08-15	0.002996	250	2	0	Impr. Grass	227	-5.79392602450917	3.90762483487607	S
1994-08-16	0.001486	289.094140418	6.76580842834	183.834487915	Impr. Grass	228	-6.47857364425666	3.92483904119711	S
1994-08-16	0.001381	271.87227175	10.3182010651	154.806732178	Less managed	228	-6.54938177840782	3.92483904119711	S
1994-08-15	0.005272	239.588447166	2.83579758137	56.669494629	Less managed	227	-5.23590610642664	3.90762483487607	S
1994-08-15	0.008293	249.175956964	4.26526895538	62.162490845	Impr. Grass	227	-4.7863324150622	3.90762483487607	S
1994-08-15	0.004339	231.128483859	4.66195202777	143.585250855	Impr. Grass	227	-5.42865386827604	3.90762483487607	S
1994-08-16	0.001128	222.7325208	7.91087102387	217.347747803	Impr. Grass	228	-6.74393719375274	3.92483904119711	S
1994-08-15	0.001341	219.296736919	4.7569630063	166.978744507	Impr. Grass	227	-6.57773236604083	3.90762483487607	S
1994-08-16	0.003563	260.174123965	3.68294867736	55.086761474	Impr. Grass	228	-5.62321682681663	3.92483904119711	S
1994-08-16	0.002761	299.701971239	4.51434634866	53.08026123	Impr. Grass	228	-5.87421498705774	3.92483904119711	S
1994-08-15	0.003107	229.880584717	6.75289177895	65.961257935	Impr. Grass	227	-5.75813306940628	3.90762483487607	S
1994-08-16	0.00453	280.24194675	5.62620641788	24.58001709	Impr. Grass	228	-5.38605628085604	3.92483904119711	S
1994-08-16	0.00143	300.680521893	7.06116921388	150.989501953	Less managed	228	-6.51571319120611	3.92483904119711	S
1994-08-16	0.007204	226.133856914	7.66211763462	197.867233276	Impr. Grass	228	-4.92620223812143	3.92483904119711	S
1994-08-15	0.015083	225.341798896	2.1280517824	75.378005981	Less managed	227	-4.19087748927725	3.90762483487607	S
1994-08-15	0.001459	208.127144261	5.91996031058	115	Impr. Grass	227	-6.49630809919643	3.90762483487607	S
1994-08-16	0.004653	227.283709439	4.83568037279	120.363006592	Impr. Grass	228	-5.35955467601923	3.92483904119711	S
1994-08-15	0.004017	225.403152466	3.06115458282	89.142272949	Impr. Grass	227	-5.50484965205705	3.90762483487607	S
1994-08-16	0.002533	253.264681289	5.6975280369	97.355255127	Impr. Grass	228	-5.95880376486843	3.92483904119711	S
1994-08-15	0.002406	232.314142609	4.2560819755	67.77999878	Impr. Grass	227	-6.00922126869724	3.90762483487607	S
1994-08-16	0.00141	329.121812221	7.40384160451	106.225982666	Less managed	228	-6.52931884326189	3.92483904119711	S
1994-08-15	0.001959	205.142931565	7.32989755662	158.95098877	Impr. Grass	227	-6.21011819314934	3.90762483487607	S
1994-08-16	0.000815	299.025936551	10.6662007471	186.457244873	Less managed	228	-7.05278105103239	3.92483904119711	S
1994-08-15	0.006792	228.346132452	2.95088157498	56.262512207	Impr. Grass	227	-4.98467519242672	3.90762483487607	S
1994-07-15	0.001496	184.158791499	7.42606215059	157.9474945069	Arable	196	-6.47208432881691	3.37398443892383	S
1994-08-15	0.002633	89.4292845277	4.45978733536	135.4490013122	Arable	227	-5.92081970753865	3.90762483487607	S
1994-08-12	0.005537	14.5838528746	0.665244509792	25.4212517738	Arable	224	-5.18731280850513	3.85598221591295	S
1994-08-15	0.001761	79.4329294288	4.11654293991	111.8150062561	Arable	227	-6.31387610008086	3.90762483487607	S
1994-08-15	0.001999	135.14917669	6.84868514922	81.4110031127	Arable	227	-6.19040340972537	3.90762483487607	S
1994-07-15	0.001789	69.8876014614	3.62328569198	151.4844970707	Arable	196	-6.29853333335995	3.37398443892383	S
1994-08-15	0.005461	45.6681249407	1.91704978959	17.9359970093	Arable	227	-5.20100918408104	3.90762483487607	S
1994-08-15	0.002985	123.00954529	4.98324158397	205.8897399903	Arable	227	-5.79754385447068	3.90762483487607	S
1994-08-15	0.002249	175.64337166	6.75260243418	112.343002319	Arable	227	-6.07528103320109	3.90762483487607	S
1994-08-16	0.007452	1.48930356119	0.310370379926	1.798249959949	Arable	228	-4.89258562732244	3.92483904119711	S
1994-08-15	0.001255	176.585647008	6.9218972639	169.7657470704	Arable	227	-6.64155223820748	3.90762483487607	S
1994-08-15	0.001962	194.728765672	7.74530318764	101.341751099	Impr. Grass	227	-6.20862602674464	3.90762483487607	S
1994-08-15	0.001059	201.412251022	7.26570666039	141.208496094	Arable	227	-6.80429657061391	3.90762483487607	S
1994-08-15	0.003267	59.1799092087	2.84939432444	159.1749992373	Arable	227	-5.70869451901722	3.90762483487607	S
1994-08-21	0.000583	330.57216414	3.68363168733	164.805511475	Less managed	233	-7.3650401358201	4.01091007280231	S
1994-08-22	0.000554	233.931160376	5.79644967064	130.40524292	Impr. Grass	234	-7.41193636002946	4.02812427912335	S
1994-08-22	0.001791	234.932649938	7.00880260002	70.445007324	Less managed	234	-6.2974463767312	4.02812427912335	S
1994-08-21	0.001372	343.697405513	8.45272987081	151.26550293	Less managed	233	-6.55569094760109	4.01091007280231	S
1994-08-22	0.002128	301.796475093	8.12788531101	122.614227295	Less managed	234	-6.12934825447137	4.02812427912335	S
1994-08-22	0.001077	218.884340576	6.44171691074	209.984771728	Impr. Grass	234	-6.7881960439245	4.02812427912335	S
1994-08-21	0.002158	387.211131376	5.86149335609	18.484741211	Less managed	233	-6.11566815056729	4.01091007280231	S
1994-08-22	0.000785	322.596554946	5.22971536478	182.554748535	Less managed	234	-7.08807883311342	4.02812427912335	S
1994-08-22	0.000726	312.930811079	5.42008774419	256.79574585	Less managed	234	-7.16135803778106	4.02812427912335	S
1994-08-22	0.003142	197.437229503	7.62998515909	42.880752563	Impr. Grass	234	-5.74710759939457	4.02812427912335	S
1994-08-21	0.000207	324.537474298	5.21234780806	200.733001709	Less managed	233	-8.26643447306905	4.01091007280231	S
1994-08-22	0.00458	245.372795595	6.28102611601	110.682739257	Less managed	234	-5.37519841088399	4.02812427912335	S
1994-08-20	0.002582	7.69173020082	0.305618600933	3.21425056458	Arable	232	-5.94001126551907	3.99369586648127	S
1994-08-20	0.001433	9.10028639498	0.764154829808	17.02099943158	Arable	232	-6.51368821582634	3.99369586648127	S
1995-06-22	0.00163	268.346289415	5.51609850847	84.363998413	Impr. Grass	173	-6.38896148556697	2.97805769353991	S
1995-06-20	0.001269	307.054748535	7.1329122994	135.004760742	Impr. Grass	171	-6.63088140524696	2.94362928089783	S
1995-06-21	0.001356	255.835198622	5.79339871995	93.691986084	Impr. Grass	172	-6.56700648559366	2.96084348721887	S
1995-06-21	0.00147	100	1	0	Impr. Grass	172	-6.48904494412395	2.96084348721887	S
1995-06-21	0.001654	242.428889411	3.55531189777	57.721496582	Impr. Grass	172	-6.37477685057501	2.96084348721887	S
1995-06-23	0.002699	333.762423548	5.99635423257	77.926513671	Impr. Grass	174	-5.89651806979903	2.99527189986095	S
1995-06-20	0.00111	388.809141159	9.66366384923	195.860260009	Less managed	171	-6.75933527386386	2.94362928089783	S
1995-06-20	0.001272	426.475888966	7.55874585626	169.432739258	Less managed	171	-6.62860953755264	2.94362928089783	S
1995-06-20	0.002327	298.750076371	8.93112430261	153.247497559	Impr. Grass	171	-6.04191609060408	2.94362928089783	S
1995-06-19	0.001623	419.151744609	5.16546734134	66.459259033	Less managed	170	-6.39313685697745	2.92641507457679	S
1995-06-20	0.00064	355.257022858	2.86317207292	67.948760986	Less managed	171	-7.27881896037297	2.94362928089783	S
1995-06-22	0.001051	234.950518624	4.87510131806	117.968261718	Impr. Grass	173	-6.81153642124159	2.97805769353991	S
1995-06-20	0.001453	320.457659461	6.48040990464	166.601242065	Impr. Grass	171	-6.5002921682113	2.94362928089783	S
1995-06-19	0.001998	407.907662129	7.10399827905	210.795257568	Less managed	170	-6.19089157180488	2.92641507457679	S
1995-06-21	0.001346	345.041531982	3.83702633858	23.619262695	Impr. Grass	172	-6.57414427464196	2.96084348721887	S
1995-06-20	0.001046	356.850296263	4.24485658795	144.470001221	Less managed	171	-6.81608809045631	2.94362928089783	S
1995-06-20	0.001275	219.369056493	5.84062637191	144.628494263	Impr. Grass	171	-6.62634281954395	2.94362928089783	S
1995-06-21	0.000881	261.353859329	2.65810056801	63.499511719	Less managed	172	-6.97925128068721	2.96084348721887	S
1995-06-21	0.001603	296.978630304	7.03532985784	100.660003662	Impr. Grass	172	-6.40516346014325	2.96084348721887	S
1995-06-19	0.003503	378.441187541	1.88918889562	12.155517578	Less managed	170	-5.63996296194325	2.92641507457679	S
1995-06-20	0.001021	366.440155029	8.00658656302	108.383270264	Less managed	171	-6.83916248751653	2.94362928089783	S
1995-06-21	0.001186	322.478317814	4.75196397922	142.072723389	Impr. Grass	172	-6.69587491994664	2.96084348721887	S
1995-06-21	0.000752	279.093729582	9.71873635993	224.503738404	Less managed	172	-7.12840195009776	2.96084348721887	S
1995-06-20	0.000821	273.853984979	7.0333381064	112.758239746	Impr. Grass	171	-7.04586858111177	2.94362928089783	S
1995-06-19	0.00513	344.13541906	4.93101454833	140.607513428	Less managed	170	-5.26295022271074	2.92641507457679	S
1995-06-20	0.000829	381.728374104	8.01319678447	195.339508057	Less managed	171	-7.0367256602791	2.94362928089783	S
1995-06-20	0.001406	274.741960214	6.74693893937	157.778503418	Impr. Grass	171	-6.53206232920764	2.94362928089783	S
1995-06-21	0.001121	284.734182179	5.74533055564	233.194976807	Impr. Grass	172	-6.74989719436656	2.96084348721887	S
1995-06-22	0.001091	237.355486351	3.75506708876	154.886245728	Impr. Grass	173	-6.7758502081022	2.97805769353991	S
1994-08-25	0.011437	8.08829637106	0.607222010098	13.68649983404	Arable	237	-4.46653931781887	4.07976689808647	S
1994-08-25	0.006087	16.8967477509	0.234647520668	2.7167510986	Impr. Grass	237	-5.09341925557518	4.07976689808647	S
1994-08-25	0.002022	8.04805888849	0.501342565698	6.83875012397	Arable	237	-6.1792409545849	4.07976689808647	S
1995-06-22	0.001014	349.751017215	3.84078102974	113.91998291	Impr. Grass	173	-6.84571988806268	2.97805769353991	S
1995-06-24	0.001729	338.33796052	6.78531881494	104.149505615	Less managed	175	-6.33170387029844	3.01248610618199	S
1995-06-23	0.002203	286.438712246	7.46192875601	236.420501709	Impr. Grass	174	-6.09549261753203	2.99527189986095	S
1995-06-23	0.00092	286.996709188	4.23713758091	27.776763916	Impr. Grass	174	-6.93821448646685	2.99527189986095	S
1995-06-24	0.000797	349.002055236	8.08140745006	222.795745849	Less managed	175	-7.07380986331222	3.01248610618199	S
1995-06-22	0.001824	308.113040419	3.00110056996	98.24822998	Impr. Grass	173	-6.27968009516591	2.97805769353991	S
1995-06-22	0.001469	240.573600089	5.75526801135	113.82748413	Impr. Grass	173	-6.4897030553685	2.97805769353991	S
1995-06-22	0.002006	284.947097343	4.24405188428	116.652999878	Impr. Grass	173	-6.18699293138922	2.97805769353991	S
1995-06-23	0.001601	299.124325696	4.59815209578	109.450256348	Impr. Grass	174	-6.40637411404415	2.99527189986095	S
1995-06-24	0.000794	379.330462646	3.52157120407	86.900726318	Less managed	175	-7.07735806336832	3.01248610618199	S
1995-06-22	0.000988	362.737036257	4.74342489212	149.196014404	Less managed	173	-6.87045949423844	2.97805769353991	S
1995-06-22	0.000945	204.150963051	3.77006512436	127.560760498	Suburban	173	-6.91276782080568	2.97805769353991	S
1995-06-23	0.000635	300.229149128	4.19405308834	134.952011108	Impr. Grass	174	-7.28609171970205	2.99527189986095	S
1995-06-23	0.001061	292.642491876	9.22826382009	187.883499145	Impr. Grass	174	-6.80249476832464	2.99527189986095	S
1995-06-24	0.000985	241.952629372	14.3976771655	196.170501709	Less managed	175	-6.8733538522648	3.01248610618199	S
1995-06-23	0.000779	318.325823737	5.26000559708	122.264755249	Impr. Grass	174	-7.09529040282898	2.99527189986095	S
1995-06-23	0.001672	268.01476092	4.69085114166	131.334259033	Impr. Grass	174	-6.3642688729766	2.99527189986095	S
1995-06-24	0.001002	278.458045044	8.67004788101	122.96598816	Impr. Grass	175	-6.85706216466662	3.01248610618199	S
1995-06-22	0.01349	187.056827068	3.86043486465	80.747009277	Impr. Grass	173	-4.30210701149801	2.97805769353991	S
1995-06-22	0.015613	283.298217417	4.05722561888	86.26675415	Impr. Grass	173	-4.15645403588561	2.97805769353991	S
1995-06-23	0.000627	316.451026633	3.52472852812	101.916503906	Impr. Grass	174	-7.297839285052	2.99527189986095	S
1995-06-23	0.000825	369.459216696	6.76700388395	198.009521484	Less managed	174	-7.04128667160666	2.99527189986095	S
1995-06-21	0.000983	192.975785678	4.01052024314	110.166000367	Impr. Grass	172	-6.87528808884464	2.96084348721887	S
1995-06-20	0.003296	204.169372739	5.06353857708	115.116500854	Impr. Grass	171	-5.6999896764175	2.94362928089783	S
1995-06-20	0.002348	259.268455792	3.40365463316	99.06274414	Impr. Grass	171	-6.03312022237682	2.94362928089783	S
1995-06-20	0.001566	207.502177951	5.11672036369	107.526748657	Impr. Grass	171	-6.42780131888323	2.94362928089783	S
1995-06-20	0.002941	337.985367355	2.84063394493	60.214508057	Impr. Grass	171	-5.81214749933433	2.94362928089783	S
1995-06-20	0.001948	341.010640933	3.08433605446	41.054748535	Impr. Grass	171	-6.21560859875578	2.94362928089783	S
1995-06-20	0.00335	347.456549603	2.30107984206	48.313232422	Impr. Grass	171	-5.68397984736002	2.94362928089783	S
1995-06-20	0.004768	179.291634114	4.38276947816	148.940734863	Impr. Grass	171	-5.33539637478946	2.94362928089783	S
1995-06-20	0.001851	338.624503174	4.29529982567	38.358764649	Impr. Grass	171	-6.26537521547584	2.94362928089783	S
1995-06-20	0.001737	190.358568997	3.81464889381	63.066757202	Impr. Grass	171	-6.32721704280485	2.94362928089783	S
1995-06-20	0.000308	188.214590963	4.47962820133	122.166748047	Arable	171	-7.93497757156357	2.94362928089783	S
1995-06-23	0.003065	392.690246582	3.04034137726	0	Less managed	174	-5.77152612674272	2.99527189986095	S
1995-06-22	0.002213	211.599927075	3.89671717725	78.453491211	Arable	173	-6.09106391233074	2.97805769353991	S
1995-06-22	0.001552	278.529137973	7.17755713134	65.616729737	Impr. Grass	173	-6.43650243033597	2.97805769353991	S
1995-06-21	0.001425	185.216775738	4.02424339828	89.754501343	Arable	172	-6.51909728919035	2.96084348721887	S
1995-06-22	0.002134	115.73425293	1.92882311344	1.28500366199999	Impr. Grass	173	-6.12659722109948	2.97805769353991	S
1995-06-21	0.005559	147.907063514	3.66636580843	64.849250793	Arable	172	-5.18338282845594	2.96084348721887	S
1995-06-22	0.001175	356.724877341	4.64584548693	95.705505371	Impr. Grass	173	-6.70481443498545	2.97805769353991	S
1995-06-23	0.002004	465.414245605	3.75018692017	0	Less managed	174	-6.18796616747577	2.99527189986095	S
1995-06-23	0.004614	393.00302274	4.32087238297	104.113494873	Less managed	174	-5.36788182993395	2.99527189986095	S
1995-06-21	0.004237	142.604307041	2.98904915243	88.6027374273	Impr. Grass	172	-5.4521680913663	2.96084348721887	S
1995-06-22	0.002605	111.111765723	2.7737050926	48.8542556762	Impr. Grass	173	-5.93131062428824	2.97805769353991	S
1995-06-23	0.014022	387.376861572	4.09192642901	53.405731201	Less managed	174	-4.26356827154688	2.99527189986095	S
1995-06-21	0.000454	198.314589364	8.63254652705	67.943008423	Impr. Grass	172	-7.59293428989291	2.96084348721887	S
1995-06-22	0.006131	257.52030332	6.23661515733	153.355758667	Less managed	173	-5.086275208305	2.97805769353991	S
1995-06-21	0.004896	168.70877236	3.42267553504	120.627998352	Impr. Grass	172	-5.30917610988291	2.96084348721887	S
1995-06-21	0.001869	189.518640982	3.94777210823	125.251739502	Arable	172	-6.25595106195657	2.96084348721887	S
1995-06-21	0.003153	212.67221269	3.53510187887	41.817993164	Impr. Grass	172	-5.74366740835512	2.96084348721887	S
1995-06-22	0.002534	227.097280531	5.65522921174	162.823760987	Impr. Grass	173	-5.95841669306178	2.97805769353991	S
1995-06-23	0.001924	392.690246582	3.04034137726	0	Less managed	174	-6.22769333797085	2.99527189986095	S
1995-06-28	0.001226	154.852094706	4.98120422271	76.773254395	Impr. Grass	179	-6.66402509405954	3.08134293146615	S
1995-06-26	0.002987	144.525624925	2.17396500609	57.148010254	Suburban	177	-5.79688509291852	3.04691451882407	S
1995-06-26	0.004437	134.060870515	3.71710215118	85.2685089114	Impr. Grass	177	-5.40657095198829	3.04691451882407	S
1995-06-27	0.002784	200.716075234	2.07758583004	29.699996949	Suburban	178	-5.86606613771365	3.06412872514511	S
1995-06-26	0.002236	147.233331986	4.00322444685	121.5325088499	Arable	177	-6.08095171360952	3.04691451882407	S
1995-06-27	0.00205	203.003019714	3.39958703421	52.963500977	Impr. Grass	178	-6.16581793425276	3.06412872514511	S
1995-06-27	0.001319	201.160548134	2.7589054971	49.107254028	Impr. Grass	178	-6.59367473267582	3.06412872514511	S
1995-06-27	0.005012	163.807225909	3.02977595372	68.990737915	Impr. Grass	178	-5.2859936168592	3.06412872514511	S
1995-06-27	0.002134	159.626997772	3.05822507524	115.7799987796	Impr. Grass	178	-6.12659722109948	3.06412872514511	S
1995-06-28	0.000521	133.378161969	2.40477388688	67.524002075	Impr. Grass	179	-7.46812134830826	3.08134293146615	S
1995-06-27	0.000988	195.420506846	3.21392306114	93.666503906	Impr. Grass	178	-6.87045949423844	3.06412872514511	S
1995-06-27	0.004284	182.717903159	2.81311403539	57.07774353	Impr. Grass	178	-5.44126437586797	3.06412872514511	S
1995-06-28	0.001547	190.532204497	4.48339298376	110.254989624	Arable	179	-6.43962840974926	3.08134293146615	S
1995-06-27	0.005169	169.139074676	3.62255574984	97.297744751	Suburban	178	-5.25544946632086	3.06412872514511	S
1995-06-28	0.001696	190.532204497	4.48339298376	110.254989624	Arable	179	-6.35042782156473	3.08134293146615	S
1995-06-27	0.00121	175.001428315	3.12394279264	85.102508545	Impr. Grass	178	-6.67664355801875	3.06412872514511	S
1995-06-27	0.001953	156.711478878	3.96038257908	71.87299347	Impr. Grass	178	-6.21310922229846	3.06412872514511	S
1995-06-26	0.00255	123.285006115	1.84134230885	59.7637481691	Suburban	177	-5.9522438339547	3.04691451882407	S
1995-06-26	0.001565	135.380119206	2.56558934537	75.9014968869	Arable	177	-6.42842032230752	3.04691451882407	S
1995-06-26	0.002313	58.8799020162	3.3448753872	62.0522499084	Arable	177	-6.04782328077737	3.04691451882407	S
1995-06-26	0.00215	113.401224747	2.73067106202	52.9884948733	Arable	177	-6.11929791861787	3.04691451882407	S
1995-06-26	0.00295	97.3473636512	3.18849950117	121.7777500156	Arable	177	-5.80914299031403	3.04691451882407	S
1995-06-26	0.001637	86.9717686781	4.13600465581	65.4057502744	Arable	177	-6.38480347541831	3.04691451882407	S
1995-06-26	0.001502	109.497005407	2.53468751075	42.6697540285	Arable	177	-6.46821085722111	3.04691451882407	S
1995-06-26	0.001419	112.986349193	3.34874735483	114.9664993283	Arable	177	-6.5231733817904	3.04691451882407	S
1995-06-23	0.003732	301.734607697	4.5252480271	81.86151123	Impr. Grass	174	-5.57750230874587	2.99527189986095	S
1995-06-24	0.003827	290.588405875	6.05251507426	156.044754029	Less managed	175	-5.55269362029335	3.01248610618199	S
1995-06-24	0.003822	284.425384283	9.63964069355	150.319015503	Less managed	175	-5.55398410956781	3.01248610618199	S
1995-06-23	0.000917	283.144846862	1.91849373196	58.638275146	Impr. Grass	174	-6.94131206251098	2.99527189986095	S
1995-06-26	0.001823	104.13607447	3.37521995831	79.9902534489	Arable	177	-6.28021385552019	3.04691451882407	S
1995-06-23	0.008185	338.444868748	4.36423896431	43.230987549	Impr. Grass	174	-4.79936191535253	2.99527189986095	S
1995-06-26	0.00355	74.1433078653	3.37625032543	84.6110019679	Arable	177	-5.62682143352007	3.04691451882407	S
1995-06-26	0.002235	107.958155402	5.26339233333	40.7042541503	Suburban	177	-6.08138925463597	3.04691451882407	S
1995-06-23	0.001907	317.385142713	3.58890903704	91.922515869	Impr. Grass	174	-6.2363425905682	2.99527189986095	S
1995-06-27	0.003466	130.931905704	3.22908188283	103.0499877935	Impr. Grass	178	-5.65043129915921	3.06412872514511	S
1995-06-27	0.00334	130.931905704	3.22908188283	103.0499877935	Impr. Grass	178	-5.68692535758978	3.06412872514511	S
1995-06-24	0.0022	349.559860087	4.88389681795	82.390014648	Impr. Grass	175	-6.09682506276581	3.01248610618199	S
1995-06-26	0.004006	111.849977713	3.02273219903	66.9230041503	Arable	177	-5.50755801269325	3.04691451882407	S
1995-06-24	0.000805	315.887571862	5.53345753238	140.910247803	Impr. Grass	175	-7.06440908902751	3.01248610618199	S
1995-06-23	0.00643	278.871009074	6.1056626649	45.174499511	Impr. Grass	174	-5.03903476861795	2.99527189986095	S
1995-06-24	0.001795	361.39765799	5.3980127101	110.494018555	Impr. Grass	175	-6.29527600148965	3.01248610618199	S
1995-06-28	0.002004	216.577914116	4.84581884665	49.257019043	Impr. Grass	179	-6.18796616747577	3.08134293146615	S
1995-06-29	0.000343	423.539089949	3.67091392634	96.186035156	Less managed	180	-7.84170094609501	3.09855713778719	S
1995-06-29	0.000881	291.054708158	6.83589437375	190.520996094	Impr. Grass	180	-6.97925128068721	3.09855713778719	S
1995-06-29	0.00334	260.6348325	3.96991114024	81.181488037	Impr. Grass	180	-5.68692535758978	3.09855713778719	S
1995-06-28	0.001561	163.171857258	5.16442297109	158.6259994504	Impr. Grass	179	-6.4309001747873	3.08134293146615	S
1995-06-29	0.000943	414.348258336	7.07839732017	129.832733155	Less managed	180	-6.9147798939191	3.09855713778719	S
1995-06-29	0.000361	262.830237767	3.61828636072	155.865020752	Impr. Grass	180	-7.79691734346804	3.09855713778719	S
1995-06-29	0.000822	379.985862652	4.61726904668	92.976257324	Less managed	180	-7.04472113405529	3.09855713778719	S
1995-06-30	0.000761	414.626961611	6.1312274987	71.746276855	Less managed	181	-7.11724250384886	3.11577134410823	S
1995-06-28	0.003459	184.930626694	4.97174117243	106.585006714	Impr. Grass	179	-5.65242418238106	3.08134293146615	S
1995-06-28	0.001548	108.257762555	3.90789413159	71.8755035396	Impr. Grass	179	-6.43900243163805	3.08134293146615	S
1995-06-29	0.000743	382.94846131	5.51078540188	191.990997315	Less managed	180	-7.13968733632943	3.09855713778719	S
1995-06-30	0.001317	369.115661621	2.89109587669	4.87597656200001	Less managed	181	-6.59513672124032	3.11577134410823	S
1995-06-28	0.002096	111.851387161	3.74095964499	96.228496552	Impr. Grass	179	-6.14414963477363	3.08134293146615	S
1995-06-28	0.009253	109.84375341	3.43929747663	72.1370010378	Impr. Grass	179	-4.67741835019572	3.08134293146615	S
1995-06-29	0.00011	392.755755615	6.58618542373	119.754241944	Less managed	180	-8.74033674273045	3.09855713778719	S
1995-06-29	0.003555	307.627509865	3.44545004392	73.546234131	Impr. Grass	180	-5.62543350824522	3.09855713778719	S
1995-06-28	0.002475	147.301854235	6.32136758496	111.0072555544	Impr. Grass	179	-5.98151421625481	3.08134293146615	S
1995-06-28	0.001242	158.240888719	5.00417883213	77.210502624	Arable	179	-6.65156387362173	3.08134293146615	S
1995-06-29	0.001103	214.780036332	4.31835928773	229.903015137	Impr. Grass	180	-6.76538803769521	3.09855713778719	S
1995-06-30	0.010366	347.778482611	4.61660343138	102.201263428	Less managed	181	-4.56441219351592	3.11577134410823	S
1995-06-29	0.002517	271.020001236	3.1928688745	210.379241944	Impr. Grass	180	-5.96501737709313	3.09855713778719	S
1995-06-27	0.001532	280.081487555	6.42108328091	83.199508667	Impr. Grass	178	-6.44906540963667	3.06412872514511	S
1995-06-29	0.001938	106.932074815	3.55008862142	82.8857498165	Impr. Grass	180	-6.22062617074775	3.09855713778719	S
1995-06-27	0.002112	156.820377749	4.2712331577	170.789230347	Impr. Grass	178	-6.13672155976512	3.06412872514511	S
1995-06-27	0.002383	131.966382345	2.70310930411	16.154502869	Arable	178	-6.01863021518075	3.06412872514511	S
1995-06-27	0.000918	124.35511097	3.69012961901	82.027496338	Arable	178	-6.9402784706877	3.06412872514511	S
1995-06-27	0.005638	144.471374154	4.87061809636	114.4447479245	Arable	178	-5.1693965864812	3.06412872514511	S
1995-06-28	0.002434	189.201089587	5.52254579429	70.794006347	Impr. Grass	179	-5.9978851149109	3.08134293146615	S
1995-06-27	0.004141	213.629212189	4.45247889757	63.849487304	Arable	178	-5.4748159100392	3.06412872514511	S
1995-06-27	0.001146	281.773318173	3.43711909116	130.494766236	Impr. Grass	178	-6.7287726234537	3.06412872514511	S
1995-06-28	0.001805	308.414634178	7.64062291795	109.196258545	Impr. Grass	179	-6.28987058292274	3.08134293146615	S
1995-06-27	0.001608	174.150634894	4.2142614423	184.3559875489	Impr. Grass	178	-6.40214322226903	3.06412872514511	S
1995-06-27	0.001936	293.553561677	7.07802316705	152.874023437	Less managed	178	-6.22163271335916	3.06412872514511	S
1995-06-27	0.001972	204.35055413	4.1391342199	103.424240112	Impr. Grass	178	-6.20366815838386	3.06412872514511	S
1995-06-27	0.004059	218.690768149	3.89857696003	111.595489502	Impr. Grass	178	-5.49457558908086	3.06412872514511	S
1995-06-28	0.001374	191.419799169	5.34351432013	49.335250854	Suburban	179	-6.55428546599235	3.08134293146615	S
1995-06-27	0.003271	218.580045527	3.8612087369	34.75050354	Impr. Grass	178	-5.70748933658753	3.06412872514511	S
1995-06-29	0.001556	106.932074815	3.55008862142	82.8857498165	Impr. Grass	180	-6.43400866345757	3.09855713778719	S
1995-06-28	0.001773	215.624827598	4.22158124376	121.244491577	Suburban	179	-6.30727178328561	3.08134293146615	S
1995-06-28	0.001388	318.030577622	4.42021421798	167.133239746	Impr. Grass	179	-6.54450201968328	3.08134293146615	S
1995-06-30	0.00063	437.085089917	1.36167319541	14.792236328	Less managed	181	-7.29341775979412	3.11577134410823	S
1995-06-30	0.000826	401.021458794	5.2266915835	127.934020996	Less managed	181	-7.04014446702788	3.11577134410823	S
1995-06-30	0.001446	434.670981752	1.88970888513	33.179016114	Less managed	181	-6.50496039942985	3.11577134410823	S
1995-06-30	0.000523	381.645531986	6.72707591465	161.01550293	Less managed	181	-7.46462484124953	3.11577134410823	S
1995-06-30	0.001719	418.61467123	3.21779448597	89.263732911	Less managed	181	-6.33734086380449	3.11577134410823	S
1995-06-30	0.003862	412.586151123	1.35924976742	36.319732666	Less managed	181	-5.54370652680957	3.11577134410823	S
1995-06-30	0.004943	349.275463425	7.90725022236	171.925018311	Less managed	181	-5.29971834746366	3.11577134410823	S
1995-06-30	0.000949	373.60710836	4.07263787358	167.976470947	Less managed	181	-6.90875577931572	3.11577134410823	S
1995-06-03	0.001764	513.037399085	5.61015099136	193.137756348	Less managed	154	-6.31222092728919	2.65098777344015	S
1995-07-03	0.000194	500.648967947	4.4234168448	191.033752441	Less managed	184	-8.31834233267107	3.16741396307135	S
1995-07-03	0.008915	468.26067725	8.8519953412	318.366271973	Less managed	184	-4.71442717192504	3.16741396307135	S
1995-07-03	0.001863	520.362310006	5.67773221844	159.741760254	Less managed	184	-6.25908258852402	3.16741396307135	S
1995-06-30	0.00221	407.814801605	3.59112741428	85.592498779	Less managed	181	-6.09239046569794	3.11577134410823	S
1995-06-30	0.001461	276.473367036	4.25272990341	85.209777832	Impr. Grass	181	-6.49498359569153	3.11577134410823	S
1995-07-03	0.006206	500.872655824	2.50281503173	38.8477783199999	Less managed	184	-5.07421427573913	3.16741396307135	S
1995-06-29	0.004072	74.6300329052	3.42504487173	86.1322555543	Arable	180	-5.49141679651387	3.09855713778719	S
1995-06-29	0.002787	72.5375760435	2.74727459545	63.2840042117	Arable	180	-5.86500812315542	3.09855713778719	S
1995-06-30	0.001088	387.724897452	3.92609981267	148.537506103	Less managed	181	-6.778482943278	3.11577134410823	S
1995-06-29	0.004317	97.8465838818	3.89634110107	87.7467460635	Arable	180	-5.43367900447871	3.09855713778719	S
1995-06-30	0.000848	350.624126074	6.53468386057	196.158737182	Less managed	181	-7.01534048966207	3.11577134410823	S
1995-06-30	0.002619	377.677977295	3.69607124132	117.86126709	Less managed	181	-5.92605140855975	3.11577134410823	S
1995-07-03	0.000806	506.055971635	6.22745240177	226.069030762	Less managed	184	-7.06324018182253	3.16741396307135	S
1995-06-29	0.003713	122.015051791	3.16815262541	120.0692520145	Arable	180	-5.58253876737084	3.09855713778719	S
1995-06-29	0.005492	104.079485088	3.62031352049	105.7110061651	Arable	180	-5.19539983254135	3.09855713778719	S
1995-07-05	0.00234	335.620816262	9.12465800355	197.947006225	Less managed	186	-6.03646191303872	3.20184237571343	S
1995-06-29	0.00121	74.9527696936	3.08905060693	105.5789985662	Arable	180	-6.67664355801875	3.09855713778719	S
1995-06-30	0.001729	415.65323007	2.95764436166	75.848022461	Less managed	181	-6.33170387029844	3.11577134410823	S
1995-07-03	0.005756	549.797329989	3.02864250676	34.9232788090001	Less managed	184	-5.1488634133797	3.16741396307135	S
1995-06-30	0.001514	387.640710663	5.77434872303	123.169494629	Less managed	181	-6.46050863685902	3.11577134410823	S
1995-06-29	0.014246	110.076047634	3.62191119678	100.9927597051	Arable	180	-4.24777550112501	3.09855713778719	S
1995-07-03	0.005902	549.797329989	3.02864250676	34.9232788090001	Less managed	184	-5.12402798145135	3.16741396307135	S
1995-07-03	0.002216	220	2	0	Less managed	184	-6.08973911637632	3.16741396307135	S
1995-06-30	0.001202	311.687571318	9.26622215043	160.441482544	Less managed	181	-6.68301300630423	3.11577134410823	S
1995-07-03	0.002247	485.454373382	5.55504314116	102.757995606	Less managed	184	-6.07615135527518	3.16741396307135	S
1995-06-30	0.001073	342.319760243	6.25610743773	174.708496093	Impr. Grass	181	-6.79175160322583	3.11577134410823	S
1995-07-06	0.003154	2.50250271092	0.404670748677	4.31849980354	Arable	187	-5.74335524977602	3.21905658203447	S
1995-07-05	0.003569	43.668345495	1.48956311843	62.985250473	Arable	186	-5.62155753440053	3.20184237571343	S
1995-07-05	0.006682	33.2963790894	1.60361951397	28.8272476196	Arable	186	-5.00088300265358	3.20184237571343	S
1995-07-05	0.002672	24.1086819389	1.39157674529	8.9300003052	Arable	186	-5.90638837475286	3.20184237571343	S
1995-07-05	0.006899	502.3840271	3.37129857815	92.252197266	Less managed	186	-4.96915751464995	3.20184237571343	S
1995-07-05	0.000997	501.903927597	6.95220877957	80.076477051	Less managed	186	-6.86182634709374	3.20184237571343	S
1995-07-06	0.000685	517.574226531	7.174795839	161.427520752	Less managed	187	-7.21564005875144	3.21905658203447	S
1995-07-06	0.000752	387.341074916	9.1112034423	124.745758057	Less managed	187	-7.12840195009776	3.21905658203447	S
1995-07-05	0.000685	459.554043579	9.0757872854	156.800750733	Less managed	186	-7.21564005875144	3.20184237571343	S
1995-07-05	0.000792	437.780101586	10.5313063639	390.40574646	Less managed	186	-7.07973054372195	3.20184237571343	S
1995-07-06	0.001235	456.454643415	11.0410502344	201.582763672	Less managed	187	-6.65699656063495	3.21905658203447	S
1995-07-04	0.000836	468.288757369	10.1975589226	278.707519531	Less managed	185	-7.02879360735919	3.18462816939239	S
1995-07-04	0.004063	374.600498199	10.0891881883	68.109741211	Less managed	185	-5.49360258973385	3.18462816939239	S
1995-07-05	0.001651	315.623737824	13.2747028057	123.996520997	Impr. Grass	186	-6.37653896556841	3.20184237571343	S
1995-07-03	0.001283	454.124357939	9.85435082763	216.014282227	Less managed	184	-6.62032323778557	3.16741396307135	S
1995-07-05	0.001058	505.325810057	6.17177135825	184.094024658	Less managed	186	-6.80519869065705	3.20184237571343	S
1995-07-06	0.007345	470.749223425	9.3005682956	111.774017334	Less managed	187	-4.90695118281937	3.21905658203447	S
1995-07-03	0.000624	515.592470987	5.03444057277	84.623260498	Less managed	184	-7.30228044705197	3.16741396307135	S
1995-07-06	0.003673	526.834920247	6.08700966368	141.619750976	Less managed	187	-5.59322548409156	3.21905658203447	S
1995-07-03	0.002025	394.64410719	7.50099743465	341.165267944	Less managed	184	-6.17779412529948	3.16741396307135	S
1995-07-05	0.001734	323.812211128	10.2442499807	181.164993286	Impr. Grass	186	-6.32889724482432	3.20184237571343	S
1995-07-05	0.001233	463.598876953	6.50600521621	110.695251465	Less managed	186	-6.65855419334864	3.20184237571343	S
1995-07-06	0.000928	426.864183044	14.8689355493	199.395996094	Less managed	187	-6.93000088792946	3.21905658203447	S
1995-07-05	0.000867	521.567972141	16.1560441176	218.12524414	Less managed	186	-6.99440308570781	3.20184237571343	S
1995-07-03	0.011524	357.112952517	7.45401800934	106.73324585	Less managed	184	-4.45899407583049	3.16741396307135	S
1995-07-05	0.000981	475.941944152	9.08913459177	217.582489014	Less managed	186	-6.87722607394731	3.20184237571343	S
1995-07-03	0.005733	404.617043801	6.89760995721	188.480743408	Less managed	184	-5.15283269980606	3.16741396307135	S
1995-07-04	0.001857	492.280924834	9.87055236953	282.084716797	Less managed	185	-6.26222395236385	3.18462816939239	S
1995-07-06	0.000679	517.574226531	7.174795839	161.427520752	Less managed	187	-7.22383682595562	3.21905658203447	S
1995-07-04	0.001495	551.38322876	5.02784942305	107.259277344	Less managed	185	-6.47273136863243	3.18462816939239	S
1995-07-05	0.011503	525.111885472	2.79488338099	20.733764649	Less managed	186	-4.46081013548126	3.20184237571343	S
1995-07-07	0.004068	2.76724007205	0.521440351042	6.71100044251	Arable	188	-5.49238767037654	3.23627078835551	S
1995-07-10	0.005013	0	1.06508646409	0	Arable	191	-5.28579608599436	3.28791340731863	S
1995-07-07	0.005781	3.58815126927	0.460896120872	11.10925030707	Arable	188	-5.14456676674212	3.23627078835551	S
1995-07-10	0.000579	11.534784987	1.35430221257	30.99874830251	Arable	191	-7.37137930126383	3.28791340731863	S
1995-07-07	0.002578	531.28261611	10.5008399785	165.136505127	Less managed	188	-5.94153217835977	3.23627078835551	S
1995-07-08	0.001528	381.123595947	6.04227882639	156.277740478	Less managed	189	-6.45159705655845	3.25348499467655	S
1995-07-07	0.009968	551.475443209	8.35172864841	114.589996338	Less managed	188	-4.60337180404671	3.23627078835551	S
1995-07-08	0.004018	363.223286179	5.82776582016	85.162994384	Less managed	189	-5.50460380079582	3.25348499467655	S
1995-07-08	0.001787	437.258799919	4.11727921956	178.660522461	Less managed	189	-6.29962147274915	3.25348499467655	S
1995-07-07	0.00157	486.83138721	4.44896551231	70.767730713	Less managed	188	-6.42532912973784	3.23627078835551	S
1995-07-06	0.000975	437.455644704	5.99265324196	128.498016358	Less managed	187	-6.88306266639177	3.21905658203447	S
1995-07-06	0.000799	559.503118739	6.55614636508	204.379974366	Less managed	187	-7.07145137165293	3.21905658203447	S
1995-07-06	0.011978	490.098921086	7.12262266232	143.066741944	Less managed	187	-4.42051801385585	3.21905658203447	S
1995-07-08	0.003447	459.027151718	3.15105813857	106.781311036	Less managed	189	-5.6558498209009	3.25348499467655	S
1995-07-06	0.003515	379.237555939	8.12103768778	136.442993164	Less managed	187	-5.63659122511588	3.21905658203447	S
1995-07-06	0.002372	406.571677072	10.7786764985	133.898010254	Less managed	187	-6.02316163385124	3.21905658203447	S
1995-07-08	0.005702	424.989206314	4.9683698838	111.277740479	Less managed	189	-5.15820765856339	3.25348499467655	S
1995-07-06	0.000698	445.230491057	10.3591360212	177.07699585	Less managed	187	-7.1981075799898	3.21905658203447	S
1995-07-07	0.001492	491.155276707	3.45109703498	87.431762695	Less managed	188	-6.474675003841	3.23627078835551	S
1995-07-07	0.000936	501.340187553	9.80427127701	144.575500489	Less managed	188	-6.92185420336164	3.23627078835551	S
1995-07-07	0.000683	480.729278966	5.8697600491	250.210266113	Less managed	188	-7.21836485607762	3.23627078835551	S
1995-07-07	0.009251	559.260534891	7.71223159098	109.661499023	Less managed	188	-4.67763335772181	3.23627078835551	S
1995-07-07	0.001084	481.50805394	6.18302696838	143.197753906	Less managed	188	-6.78200407367658	3.23627078835551	S
1995-07-06	0.004515	468.330900535	5.05525003004	129.544982911	Less managed	187	-5.38933676493521	3.21905658203447	S
1995-07-08	0.0117	464.321434869	4.30676145134	76.626770019	Less managed	189	-4.44390203839197	3.25348499467655	S
1995-07-08	0.005943	462.402442746	5.83585665793	144.20803833	Less managed	189	-5.11716315750609	3.25348499467655	S
1995-07-07	0.000743	501.291305888	2.81964649072	90.249786377	Less managed	188	-7.13968733632943	3.23627078835551	S
1995-07-07	0.004421	373.316042945	9.73228582314	121.773254395	Less managed	188	-5.41014318173029	3.23627078835551	S
1995-07-06	0.002408	581.560499763	4.90984697075	130.167541504	Less managed	187	-6.00840726783829	3.21905658203447	S
1995-07-07	0.000699	413.532496861	13.8434397773	223.714233398	Less managed	188	-7.19677157444705	3.23627078835551	S
1995-07-07	0.000397	457.005925118	10.563184124	170.75378418	Less managed	188	-7.71295196335071	3.23627078835551	S
1995-07-08	0.001617	384.587442592	5.23354973309	162.173492432	Less managed	189	-6.39672967521348	3.25348499467655	S
1995-07-07	0.001317	333.113544833	12.5134443737	149.458251953	Less managed	188	-6.59513672124032	3.23627078835551	S
1995-07-07	0.004782	492.511714812	4.91840938755	104.501739502	Less managed	188	-5.33249481834962	3.23627078835551	S
1995-07-07	0.001316	438.859125004	8.95227888296	182.494506836	Less managed	188	-6.59586851783354	3.23627078835551	S
1995-07-07	0.001412	439.6663663	10.6705374427	189.026519775	Less managed	188	-6.52794991765455	3.23627078835551	S
1995-07-07	0.002683	452.08618103	8.40740285099	203.21170044	Less managed	188	-5.90235537203621	3.23627078835551	S
1995-06-05	0.015856	568.539053062	7.47744787953	110.577209473	Less managed	156	-4.14105888244719	2.68541618608223	S
1995-07-08	0.005316	444.408314336	5.95528787448	188.565246582	Less managed	189	-5.2276725269787	3.25348499467655	S
1995-07-07	0.00348	471.471851908	4.81773187362	71.856994629	Less managed	188	-5.64645740803693	3.23627078835551	S
1995-07-07	0.001178	486.878950248	8.62390741656	196.981445313	Less managed	188	-6.70236844925719	3.23627078835551	S
1995-07-07	0.001737	342.107422271	8.57490284644	129.988006592	Impr. Grass	188	-6.32721704280485	3.23627078835551	S
1995-07-08	0.000964	417.808829364	4.65671687486	172.435760498	Less managed	189	-6.89385237381315	3.25348499467655	S
1995-07-07	0.001065	364.326336405	12.1414221739	224.507751464	Less managed	188	-6.79890087407006	3.23627078835551	S
1995-07-06	0.001229	422.378615285	11.5124712994	184.052246094	Less managed	187	-6.66167675638543	3.21905658203447	S
1995-07-08	0.011382	436.289050709	3.8107315627	61.852752685	Less managed	189	-4.47133883835457	3.25348499467655	S
1995-07-10	0.001201	13.9363425732	1.06262582967	26.5537490845	Arable	191	-6.68381204749736	3.28791340731863	S
1995-07-11	0.003268	4.1663781123	0.528308739515	8.14699983597	Arable	192	-5.70839308721388	3.30512761363967	S
1995-07-10	0.002839	4.51736308928	0.489340901787	6.76849961281	Arable	191	-5.84684485749804	3.28791340731863	S
1995-07-11	0.002472	2.91536957803	0.476219295403	4.99550008774	Arable	192	-5.98270304143941	3.30512761363967	S
1995-07-10	0.007273	363.574525146	7.05811972062	187.640502929	Less managed	191	-4.9167351989032	3.28791340731863	S
1995-07-10	0.011719	470.766801834	6.75864200294	44.478240967	Less managed	191	-4.44228632308661	3.28791340731863	S
1995-07-10	0.014454	604.242926775	3.47932328498	66.7810058600001	Less managed	191	-4.23333080552959	3.28791340731863	S
1995-07-10	0.007047	445.203269837	7.54300076242	164.001770019	Less managed	191	-4.94808311943929	3.28791340731863	S
1995-07-10	0.004079	461.914687531	4.93677162445	42.635009766	Less managed	191	-5.48972003207818	3.28791340731863	S
1995-07-10	0.013842	461.601524157	5.03710380779	83.303741455	Less managed	191	-4.27644214410031	3.28791340731863	S
1995-07-10	0.016901	471.882441227	4.26622724801	89.287994385	Less managed	191	-4.07742844984579	3.28791340731863	S
1995-07-10	0.00898	463.575949649	7.27004375269	173.393737793	Less managed	191	-4.70720291155324	3.28791340731863	S
1995-07-10	0.003127	607.858210944	5.05486828965	58.6000366210001	Less managed	191	-5.75181792369476	3.28791340731863	S
1995-07-10	0.015492	592.211929567	4.37057663329	194.142761231	Less managed	191	-4.16420924219509	3.28791340731863	S
1995-07-14	0.003276	256.950071062	5.57781740597	48.064498902	Impr. Grass	195	-5.7059848982114	3.35677023260279	S
1995-07-14	0.00131	309.142239259	9.97280944013	272.762756347	Impr. Grass	195	-6.60027057923418	3.35677023260279	S
1995-07-14	0.001565	367.848879214	15.8174802639	56.486511231	Less managed	195	-6.42842032230752	3.35677023260279	S
1995-07-14	0.002207	317.142215962	17.318566517	237.569488525	Impr. Grass	195	-6.09371878114674	3.35677023260279	S
1995-07-14	0.001084	271.476730347	12.8011739228	186.809249878	Less managed	195	-6.78200407367658	3.35677023260279	S
1995-07-14	0.00105	336.601992383	10.8508132343	191.637252807	Impr. Grass	195	-6.81244509917781	3.35677023260279	S
1995-07-14	0.001955	320.80950978	11.7683984081	225.409515381	Less managed	195	-6.2121112182236	3.35677023260279	S
1995-07-20	0.001119	36.1035494686	0.91542925611	16.3472480774	Impr. Grass	201	-6.75160659649221	3.46005547052903	S
1995-07-20	0.003679	46.1063856686	1.99459192069	44.1957511902	Arable	201	-5.59161517778545	3.46005547052903	S
1995-07-20	0.009641	41.9322727926	2.55616581475	51.4215011597	Arable	201	-4.63655765922972	3.46005547052903	S
1995-07-20	0.004117	40.0123289665	2.40382807323	56.2410011292	Arable	201	-5.48055892654182	3.46005547052903	S
1995-07-20	0.008236	55.8473918135	1.66907577435	47.9742469787	Arable	201	-4.79318793532693	3.46005547052903	S
1995-07-20	0.008239	56.7496762648	2.05070544621	47.091003418	Arable	201	-4.79282594437275	3.46005547052903	S
1995-07-24	0.001457	517.917057582	5.12548003878	66.72454834	Less managed	205	-6.49763435933778	3.52891229581319	S
1995-07-24	0.000263	443.871426992	8.90218246764	265.130767822	Less managed	205	-8.06930736742412	3.52891229581319	S
1995-07-24	0.002134	469.730429225	6.65007596779	187.659790039	Less managed	205	-6.12659722109948	3.52891229581319	S
1995-07-24	0.008993	490.020430847	6.09217101823	134.653503418	Less managed	205	-4.70576430122379	3.52891229581319	S
1995-07-24	0.000615	15	1.5	0	Less managed	205	-7.31572351730842	3.52891229581319	S
1995-07-24	0.000856	353.142100054	7.69906207864	183.230987549	Impr. Grass	205	-7.00647125192129	3.52891229581319	S
1995-07-25	0.001337	315.043788531	7.36261476451	143.388977051	Impr. Grass	206	-6.58061213764944	3.54612650213423	S
1995-07-24	0.013237	416.625894495	4.88365304953	64.906524659	Less managed	205	-4.32096916537297	3.52891229581319	S
1995-07-24	0.00065	425.37144928	14.9544365287	118.606506347	Less managed	205	-7.26443022292087	3.52891229581319	S
1995-07-24	0.001258	330.877220104	6.95221402002	217.95350647	Less managed	205	-6.63925602594713	3.52891229581319	S
1995-07-24	0.000878	367.021598089	7.87918620707	135.272216797	Less managed	205	-6.98247882517807	3.52891229581319	S
1995-07-24	1e-06	333.112120906	6.83131739486	129.255249023	Impr. Grass	205	-9.88368492523995	3.52891229581319	S
1995-07-24	0.008923	437.148788324	7.04540293557	112.921478271	Less managed	205	-4.71353521066622	3.52891229581319	S
1995-07-24	0.001935	523.798381496	10.8207825144	144.638244629	Less managed	205	-6.22213636484298	3.52891229581319	S
1995-07-25	0.000801	336.271611735	4.96139452546	200.694244385	Impr. Grass	206	-7.0690984293909	3.54612650213423	S
1995-07-24	0.000989	473.818255656	6.35100250872	159.596984864	Less managed	205	-6.86949656686505	3.52891229581319	S
1995-07-24	0.00115	326.090674225	6.74049769562	114.775268554	Impr. Grass	205	-6.72543372218818	3.52891229581319	S
1995-07-24	0.00553	4.89697841944	0.644816423041	13.540749549912	Arable	205	-5.18856650258892	3.52891229581319	S
1995-07-24	0.003534	8.99586552126	0.931547937082	19.97125053411	Arable	205	-5.63127578386945	3.52891229581319	S
1995-07-25	0.008997	6.2498266538	0.190255621622	1.46074962616	Impr. Grass	206	-4.70532206793853	3.54612650213423	S
1995-07-25	0.002798	5.94255233301	0.230738039431	4.71499991417	Arable	206	-5.86113828543241	3.54612650213423	S
1995-07-25	0.000975	230.557772167	4.12294133558	146.388275146	Impr. Grass	206	-6.88306266639177	3.54612650213423	S
1995-07-25	0.001282	202.364305349	9.68289623352	100.192245484	Impr. Grass	206	-6.62107370686394	3.54612650213423	S
1995-07-27	0.000586	87.619819455	2.73573324614	62.1185035707	Arable	208	-7.36031199462415	3.58055491477631	S
1995-07-25	0.002595	183.141703912	4.64462718323	166.6827468875	Impr. Grass	206	-5.93508421367187	3.54612650213423	S
1995-07-26	0.001445	122.912135089	4.29741045929	69.3370056149	Arable	207	-6.50562907213949	3.56334070845527	S
1995-07-26	0.004033	194.779570432	4.26841747511	133.966247559	Impr. Grass	207	-5.5009232666447	3.56334070845527	S
1995-07-27	0.002481	60.2997743545	2.2526751875	65.8432502745	Arable	208	-5.97914079741915	3.58055491477631	S
1995-07-26	0.001433	176.675968587	3.63946348379	126.823501587	Arable	207	-6.51368821582634	3.56334070845527	S
1995-07-26	0.00347	114.1830421	3.94863483819	100.5605010988	Impr. Grass	207	-5.64929428937213	3.56334070845527	S
1995-07-26	0.00285	175.826472371	4.81598623806	148.8312530513	Impr. Grass	207	-5.84304454198971	3.56334070845527	S
1995-07-25	0.003474	185.898882911	6.74192550088	171.0749816897	Impr. Grass	206	-5.6481585709082	3.54612650213423	S
1995-07-26	0.00146	193.450275293	4.97936681933	114.800994873	Arable	207	-6.4956456281553	3.56334070845527	S
1995-07-25	0.00088	217.731823583	5.56079635327	155.840515136	Impr. Grass	206	-6.98032597181697	3.54612650213423	S
1995-07-25	0.002734	190.884051439	5.82810063745	132.992980957	Impr. Grass	206	-5.88386653650996	3.54612650213423	S
1995-07-25	0.000796	228.280146917	4.95852647556	58.084747314	Arable	206	-7.07499119835805	3.54612650213423	S
1995-07-24	0.001449	227.180390113	6.65716439741	106.677001953	Impr. Grass	205	-6.50295705986168	3.52891229581319	S
1995-07-25	0.008736	4.89433999221	0.40061954565	5.08200001716	Arable	206	-4.73459573342855	3.54612650213423	S
1995-07-25	0.000102	6.09467097852	0.962498523494	23.74875044826	Arable	206	-8.791630037118	3.54612650213423	S
1995-07-26	0.009656	21.8514756685	1.77992152572	60.61049842837	Arable	207	-4.63501102799911	3.56334070845527	S
1995-07-25	0.007691	5.22487055408	0.333123173899	3.99125003814	Arable	206	-4.86122440075956	3.54612650213423	S
1995-07-29	0.000536	372.019577519	4.03217299907	49.1875	Impr. Grass	210	-7.44219076838726	3.61498332741839	S
1995-07-28	0.004844	506.604623006	3.15164574241	54.530029296	Less managed	209	-5.31974531396166	3.59776912109735	S
1995-07-28	0.000433	526.719642251	2.66183866257	32.303985596	Less managed	209	-7.6354939043117	3.59776912109735	S
1995-07-27	0.002475	72.6568756623	3.60847620372	62.4979972838	Arable	208	-5.98151421625481	3.58055491477631	S
1995-07-28	0.008962	418.324470726	2.9307488493	33.056762695	Less managed	209	-4.70919825641214	3.59776912109735	S
1995-07-28	8.2e-05	428.277638753	4.64505861203	38.901000977	Less managed	209	-8.9327086353779	3.59776912109735	S
1995-07-29	0.00468	260.514016288	9.13000985864	106.360748291	Less managed	210	-5.3538300764783	3.61498332741839	S
1995-07-28	0.000354	546.250440953	4.5747188898	72.916259766	Less managed	209	-7.81409568000312	3.59776912109735	S
1995-07-27	0.003173	60.7502587409	1.97698286602	45.4745025635	Arable	208	-5.73744267614884	3.58055491477631	S
1995-07-28	6e-04	449.556552794	3.79577215803	91.628753662	Less managed	209	-7.33853819507459	3.59776912109735	S
1995-07-28	1e-06	495.415319555	2.36645691272	29.826507568	Less managed	209	-9.88368492523995	3.59776912109735	S
1995-07-27	0.003612	48.9176668803	1.67892204622	39.6450004577	Arable	208	-5.60974583272982	3.58055491477631	S
1995-07-27	0.012159	62.8204592678	1.9668434292	54.8147506713	Arable	208	-4.40558189429542	3.58055491477631	S
1995-07-28	0.014846	476.993534744	2.78281738678	73.29876709	Less managed	209	-4.20666255844743	3.59776912109735	S
1995-07-28	0.000589	509.12004148	2.17350607738	27.268493652	Less managed	209	-7.35560610358674	3.59776912109735	S
1995-07-28	0.001737	343.092350027	10.1781471468	196.524993896	Less managed	209	-6.32721704280485	3.59776912109735	S
1995-07-27	0.000472	66.4718351613	2.6551054539	92.6972541811	Arable	208	-7.55784297008164	3.58055491477631	S
1995-07-28	0.001519	366.491928101	7.09552497927	156.525268555	Less managed	209	-6.45731680523124	3.59776912109735	S
1995-07-28	0.001814	515.107465375	3.91603747491	124.958740235	Less managed	209	-6.28503056271874	3.59776912109735	S
1995-07-29	0.002749	254.196111613	6.02490218491	148.134475708	Impr. Grass	210	-5.87849306844882	3.61498332741839	S
1995-07-28	0.001123	506.253817454	4.05338612327	200.398254395	Less managed	209	-6.7481907093108	3.59776912109735	S
1995-07-29	0.004424	10.0785572165	0.296742222927	3.13749885561	Arable	210	-5.4094724159142	3.61498332741839	S
1995-07-31	0.005638	8.31919444049	0.193041656327	2.29774999619	Arable	212	-5.1693965864812	3.64941174006047	S
1995-07-28	0.003995	7.72050001666	0.594649507552	13.28675031661	Arable	209	-5.51027372847168	3.59776912109735	S
1995-07-28	1e-06	21.0237706172	3.43052736942	64.90874767304	Arable	209	-9.88368492523995	3.59776912109735	S
1995-07-28	0.003273	10.5541303644	1.20243121352	15.57150030134	Arable	209	-5.70688728960968	3.59776912109735	S
1995-07-27	0.016391	4.34427559814	0.287592813736	3.35175013542	Arable	208	-4.1079770639534	3.58055491477631	S
1995-07-28	0.009158	10.2959650856	1.14639502679	15.57150030134	Arable	209	-4.68768260756256	3.59776912109735	S
1995-07-28	0.008935	7.92919334748	0.680232342239	13.1605000496	Arable	209	-4.71219875874661	3.59776912109735	S
1995-07-28	0.002675	11.5365061375	1.32246728679	65.02174758911	Arable	209	-5.90528685086693	3.59776912109735	S
1995-07-29	0.002802	9.78692130752	0.507179559776	11.48724937435	Arable	210	-5.85973477643009	3.61498332741839	S
1995-07-29	0.000786	303.220279578	3.39742380561	65.264526367	Impr. Grass	210	-7.08688194487957	3.61498332741839	S
1995-08-01	0.00541	99.6732466464	2.24226312197	43.5794982911	Arable	213	-5.21030648922532	3.66662594638151	S
1995-08-02	0.00291	91.8916439709	2.06680062125	25.0419998168	Arable	214	-5.82256601064617	3.68384015270255	S
1995-08-01	0.008346	90.9227598364	3.74464860428	40.3092422486	Impr. Grass	213	-4.77999987702375	3.66662594638151	S
1995-08-01	0.002956	92.8022857975	2.92577715971	63.7455024721	Arable	213	-5.80714498765135	3.66662594638151	S
1995-08-01	0.009641	84.3364177031	2.03410090009	26.5727462768	Arable	213	-4.63655765922972	3.66662594638151	S
1995-08-01	0.00808	79.100647829	4.12486175451	79.2962493892	Arable	213	-4.81219435542242	3.66662594638151	S
1995-08-01	0.001721	73.5871443442	3.24597203458	53.7604980465	Arable	213	-6.33621092018144	3.66662594638151	S
1995-08-01	0.007909	94.5149229706	2.68093558688	45.7430038453	Arable	213	-4.83345191515842	3.66662594638151	S
1995-07-31	0.005774	31.0055253312	1.76227998795	34.8990020752	Suburban	212	-5.14576796808775	3.64941174006047	S
1995-07-31	0.001371	74.9730113088	4.49002750751	92.0779972079	Arable	212	-6.55639442986717	3.64941174006047	S
1995-08-01	0.001736	67.3479354272	2.28226136384	49.9384994507	Suburban	213	-6.32777679652783	3.66662594638151	S
1995-07-31	0.001735	78.0433980977	5.35596565516	77.4674987793	Less managed	212	-6.32833686375053	3.64941174006047	S
1995-07-31	0.005126	26.6068709896	1.97539631422	20.2374992371	Arable	212	-5.26372272178354	3.64941174006047	S
1995-07-31	0.012117	7.55205452304	0.714148225413	16.49175047877	Arable	212	-4.40902791017683	3.64941174006047	S
1995-08-01	0.006297	10.8895537065	0.495978828371	32.00324821468	Arable	213	-5.0597730186578	3.66662594638151	S
1995-08-01	0.00622	10.6990614482	1.15396628965	31.10625076299	Arable	213	-5.07197892433731	3.66662594638151	S
1995-07-31	0.002374	10.4150327839	2.12556175449	37.66274881359	Arable	212	-6.02233621077507	3.64941174006047	S
1995-08-02	0.000346	6.24169593919	0.190116378213	2.734000206	Arable	214	-7.83409634670979	3.68384015270255	S
1995-08-02	0.003466	5.41823592599	0.18080233259	5.12650036812	Arable	214	-5.65043129915921	3.68384015270255	S
1995-08-01	0.010238	8.55910104973	0.373251083562	9.89825057986	Arable	213	-4.57677711148687	3.66662594638151	S
1995-08-01	0.005568	7.09536546084	0.233223334919	2.30000019074	Arable	213	-5.18177955030009	3.66662594638151	S
1995-08-02	0.018009	6.41591865465	0.235078986246	9.34774947162	Arable	214	-4.01411110351193	3.68384015270255	S
1995-08-01	0.001671	7.04912208217	0.367332457009	2.51500034333	Arable	213	-6.36484976175274	3.66662594638151	S
1995-07-31	0.010824	6.75208213329	0.29524769645	4.98400020599	Arable	212	-4.52138066025841	3.64941174006047	S
1995-08-01	0.001868	8.04994185075	0.267510108146	2.9557504654	Arable	213	-6.25647230252089	3.66662594638151	S
1995-07-31	0.002275	5.02484448447	0.229623508284	2.09499979019	Arable	212	-6.06403523994282	3.64941174006047	S
1995-08-01	0.010207	21.3140939145	1.04354374204	52.02599906918	Arable	213	-4.57979487965686	3.66662594638151	S
1995-08-02	0.001666	84.9872717328	3.28564400408	103.1044998165	Arable	214	-6.36775927791637	3.68384015270255	S
1995-08-02	0.002826	60.944065926	3.11849731744	56.6577472687	Arable	214	-5.85135483912334	3.68384015270255	S
1995-08-04	0.002562	202.107276661	3.5283504025	109.757980346	Impr. Grass	216	-5.94763906756795	3.71826856534463	S
1995-08-02	0.002441	74.5249349829	2.08790724949	67.3080024719	Arable	214	-5.99507104270209	3.68384015270255	S
1995-08-03	0.0027	93.2716428484	4.45321877343	36.0272445676	Arable	215	-5.89615436730366	3.70105435902359	S
1995-08-03	0.002577	184.476705933	5.33708020449	68.947494507	Impr. Grass	215	-5.94191276827873	3.70105435902359	S
1995-08-03	0.002947	80.5991234854	3.12313485157	115.4035034184	Arable	215	-5.81014349064761	3.70105435902359	S
1995-08-01	0.002731	68.7696402088	2.40270090045	56.6845016479	Arable	213	-5.88494470373031	3.66662594638151	S
1995-08-03	0.001888	147.34162327	5.13558100188	149.1134948735	Impr. Grass	215	-6.24609876551356	3.70105435902359	S
1995-08-02	0.009441	3.86459658905	0.166071985933	1.7647497654	Arable	214	-4.65741129783378	3.68384015270255	S
1995-08-03	0.007495	3.40429825114	0.165246348109	1.20175004006	Arable	215	-4.88687018676232	3.70105435902359	S
1995-08-03	0.013944	6.27159376786	0.211005317137	2.91800022125	Arable	215	-4.26912661265843	3.70105435902359	S
1995-08-07	0.007754	6.49727687716	0.851579460273	101.144998967245	Arable	219	-4.85311885622127	3.76991118430775	S
1995-08-04	0.001094	194.732869714	3.38665477698	144.220481872	Arable	216	-6.77322438602453	3.71826856534463	S
1995-08-04	0.001512	185.427946898	3.83173241199	123.96900177	Impr. Grass	216	-6.46178822756464	3.71826856534463	S
1995-08-04	0.001774	179.1098183	6.06019594645	91.221496583	Less managed	216	-6.30672338733	3.71826856534463	S
1995-08-04	0.00122	224.809605039	3.98029667057	50.621505737	Impr. Grass	216	-6.66873837851164	3.71826856534463	S
1995-08-04	0.00107	220.483541544	5.00027657221	74.525253295	Impr. Grass	216	-6.79442659367513	3.71826856534463	S
1995-08-04	0.001863	180.326332092	2.70414378246	27.177246094	Arable	216	-6.25908258852402	3.71826856534463	S
1995-08-04	0.001936	163.250980176	3.28249044481	77.944000245	Arable	216	-6.22163271335916	3.71826856534463	S
1995-08-04	0.002172	183.850153605	4.66049982442	58.790756226	Impr. Grass	216	-6.1093475877647	3.71826856534463	S
1995-08-07	0.001326	7.33599140227	0.743476610672	20.98825037477	Arable	219	-6.58857453947099	3.76991118430775	S
1995-08-08	0.00085	21.6396994514	0.762315033245	109.498001099	Arable	220	-7.01311579463996	3.78712539062879	S
1995-08-08	0.001745	16.4200161613	0.44414198124	15.5160007477	Arable	220	-6.32275025704189	3.78712539062879	S
1995-08-08	0.002291	17.7225179603	0.668675798859	37.92850208283	Arable	220	-6.05717709047336	3.78712539062879	S
1995-08-08	0.003447	29.1924203797	1.24032717916	103.5395011906	Arable	220	-5.6558498209009	3.78712539062879	S
1995-08-07	0.000325	15.8237276773	2.25635929246	48.65825200085	Arable	219	-7.88858453199386	3.76991118430775	S
1995-08-07	0.003115	17.9410477706	1.57560568777	50.88424921037	Arable	219	-5.755602223386	3.76991118430775	S
1995-08-08	0.000543	45.3213358347	2.02673834382	131.9897537228	Arable	220	-7.43031615896655	3.78712539062879	S
1995-08-08	0.003439	8.62093871739	0.476790885784	27.22150087357	Arable	220	-5.6581401167775	3.78712539062879	S
1995-08-08	0.001916	11.3143183813	0.557914716597	21.3522491455	Arable	220	-6.23175425725716	3.78712539062879	S
1995-08-07	0.005749	4.17297341112	0.343460790396	4.24899959564	Arable	219	-5.15006979008783	3.76991118430775	S
1995-08-08	0.002314	4.94209821451	0.362999940247	2.62775015831	Arable	220	-6.04740017943829	3.78712539062879	S
1995-08-08	0.002972	25.0616261293	0.954599217792	31.2842521668	Arable	220	-5.80183641513159	3.78712539062879	S
1995-08-10	0.000307	2.28842054635	0.323258818045	13.468000233133	Arable	222	-7.93777477618463	3.82155380327087	S
1995-08-10	0.00237	1.81934955664	0.217886975776	5.951750159269	Arable	222	-6.02398773881354	3.82155380327087	S
1995-08-09	0.004769	1.71753555271	0.229448685654	2.66099989414	Arable	221	-5.33518884132394	3.80433959694983	S
1995-08-10	0.004672	16.367843032	1.59936814319	50.996249675744	Arable	222	-5.35552284031882	3.82155380327087	S
1995-08-10	0.003092	31.9680160225	1.62395772986	73.28450202939	Arable	222	-5.76289573914871	3.82155380327087	S
1995-08-10	0.002687	7.92910801628	0.703451237837	10.778999567	Arable	222	-5.9008928489236	3.82155380327087	S
1995-08-10	0.004219	8.70068184679	0.858556551554	20.9507498741	Arable	222	-5.45637567120631	3.82155380327087	S
1995-08-10	0.001164	38.2800867664	2.29907751732	71.75499629972	Arable	222	-6.71383458634483	3.82155380327087	S
1995-08-09	0.004736	7.2995819065	0.204729062526	6.0880002975	Arable	221	-5.34206028949596	3.80433959694983	S
1995-08-09	0.005539	6.61206054315	0.265516431595	2.55275011063	Arable	221	-5.18695489869458	3.80433959694983	S
1995-08-09	0.001716	114.772873905	3.20767909559	106.3889961242	Arable	221	-6.33903817680037	3.80433959694983	S
1995-08-09	0.004699	47.8854875683	0.999668867818	10.7572479248	Arable	221	-5.34982120941515	3.80433959694983	S
1995-08-09	0.002101	8.42862173317	0.308627803834	6.50499916078	Arable	221	-6.14182242869654	3.80433959694983	S
1995-08-14	0.000971	24.8949946264	0.637883974693	43.58274936675	Arable	226	-6.88697273979961	3.89041062855503	S
1995-08-14	0.016151	13.8393919017	3.660351365	41.58899927136	Arable	226	-4.12268231025386	3.89041062855503	S
1995-08-14	0.001725	39.5888691382	1.51924172836	73.72724962239	Arable	226	-6.33395485605476	3.89041062855503	S
1995-08-14	0.007624	3.62508958057	0.525613649785	9.4267503023	Arable	226	-4.86991728715738	3.89041062855503	S
1995-08-11	0.009183	8.81411658157	0.349151145943	10.1707496643	Arable	223	-4.68497125619165	3.83876800959191	S
1995-08-14	0.007582	37.3570884106	1.09000181484	57.1409988403	Arable	226	-4.87540534483615	3.89041062855503	S
1995-08-11	0.001944	8.70012744524	0.33130482708	10.33574962615	Arable	223	-6.21761260744249	3.83876800959191	S
1995-08-14	0.004973	19.7676923412	1.32523410569	28.09725093846	Arable	226	-5.29372791421423	3.89041062855503	S
1995-08-14	0.003598	6.62056790652	0.569663812535	12.8442494869	Arable	226	-5.61357620677005	3.89041062855503	S
1995-08-15	0.003106	89.862613678	3.45184575695	89.9944992062	Arable	227	-5.75844987599851	3.90762483487607	S
1995-08-15	0.002312	61.8856206045	2.70111133839	95.0057487493	Arable	227	-6.04824656120697	3.90762483487607	S
1995-08-15	0.003527	69.9222205694	3.40384903848	113.5357456205	Arable	227	-5.63323081870526	3.90762483487607	S
1995-08-15	0.006584	38.9561949735	2.48622401112	76.4192523956	Arable	227	-5.01554733845728	3.90762483487607	S
1995-08-15	0.001632	136.782896917	4.48503150533	114.9962539669	Arable	227	-6.38777171743138	3.90762483487607	S
1995-08-15	0.001251	122.897460393	4.55711094977	100.1882438656	Arable	227	-6.64462207945177	3.90762483487607	S
1995-08-16	0.008287	28.1419865042	0.738995796092	30.722000122	Arable	228	-4.78705183955366	3.92483904119711	S
1995-08-15	0.002584	131.78022216	4.82934967326	108.3185043331	Arable	227	-5.93925167566105	3.90762483487607	S
1995-08-15	0.007918	27.576257864	1.48980878488	28.5827522278	Arable	227	-4.83232175869984	3.90762483487607	S
1995-08-15	0.001921	147.161291397	3.67279310514	82.6325073238	Arable	227	-6.22921425081155	3.90762483487607	S
1995-08-13	0.001467	43.0157977496	2.33893372583	114.4692592619	Arable	225	-6.49102057861574	3.87319642223399	S
1995-08-17	0.001847	125.016947066	3.79104009056	99.861000061	Arable	229	-6.26748158802926	3.94205324751815	S
1995-08-17	0.002872	76.1698447812	2.67590453311	130.9347572327	Arable	229	-5.83548696565363	3.94205324751815	S
1995-08-17	0.004745	134.270790395	3.07742790425	68.5839996338	Arable	229	-5.34018157064674	3.94205324751815	S
1995-08-17	0.002562	112.35967854	3.90534801022	85.6332473752	Arable	229	-5.94763906756795	3.94205324751815	S
1995-08-17	0.001781	40.6974839683	2.15852484926	92.3952503204	Arable	229	-6.30289301328976	3.94205324751815	S
1995-08-17	0.001762	99.240366671	3.46153680335	127.6582489014	Arable	229	-6.31332407136135	3.94205324751815	S
1995-08-17	0.005499	121.526795559	3.18757132966	48.7474975588	Arable	229	-5.19413754763837	3.94205324751815	S
1995-08-17	0.001369	116.913797807	4.06453798276	74.7369995114	Arable	229	-6.55780288080423	3.94205324751815	S
1995-08-17	0.003334	104.706820406	3.84276141401	104.4259986874	Arable	229	-5.68869683723816	3.94205324751815	S
1996-06-18	0.00157	351.323049386	5.07338189366	233.67251587	Impr. Grass	170	-6.42532912973784	2.92641507457679	S
1996-06-18	0.001648	416.809163603	5.32108482046	99.613525391	Less managed	170	-6.37830419109298	2.92641507457679	S
1996-06-19	0.001075	391.247291598	5.40040419886	159.723266601	Impr. Grass	171	-6.78997224332575	2.94362928089783	S
1996-06-19	0.00111	371.723661487	6.84150313791	121.514984131	Impr. Grass	171	-6.75933527386386	2.94362928089783	S
1996-06-18	0.002754	296.205267045	4.37255356286	145.593261719	Impr. Grass	170	-5.87670830980979	2.92641507457679	S
1996-06-18	0.001943	324.866880931	3.89575436779	115.399749755	Less managed	170	-6.21811423775148	2.92641507457679	S
1996-06-18	0.00178	282.284623313	4.52761383868	69.906494141	Impr. Grass	170	-6.30343931212881	2.92641507457679	S
1996-06-19	0.001679	342.243495923	6.3669397063	135.736236572	Impr. Grass	171	-6.36021207228098	2.94362928089783	S
1996-06-17	0.003588	262.002145794	3.30872079184	77.004989624	Impr. Grass	169	-5.61632119888621	2.90920086825575	S
1996-06-18	0.001198	420.973011495	6.26046584909	138.901000976	Less managed	170	-6.6862130090349	2.92641507457679	S
1996-06-19	0.00504	249.426269726	5.65528751181	75.847000122	Impr. Grass	171	-5.28047744841971	2.94362928089783	S
1996-06-17	0.001798	343.999296292	3.12653265446	76.845520019	Impr. Grass	169	-6.29365130576265	2.90920086825575	S
1996-06-16	0.00075	382.402425847	7.8767922202	230.664520263	Impr. Grass	168	-7.13089883029635	2.89198666193471	S
1996-06-18	0.001911	413.457339119	5.68583438921	131.190979004	Impr. Grass	170	-6.23430073176793	2.92641507457679	S
1996-06-17	0.00309	286.928070402	8.66889383236	122.847000122	Impr. Grass	169	-5.76353247906197	2.90920086825575	S
1996-06-18	0.001707	342.750928641	6.28241392219	172.26473999	Impr. Grass	170	-6.34414746977718	2.92641507457679	S
1996-06-18	0.000771	321.053240749	5.1051507439	189.268737793	Impr. Grass	170	-7.10498744851185	2.92641507457679	S
1996-06-16	0.001765	382.402425847	7.8767922202	230.664520263	Impr. Grass	168	-6.31166981126532	2.89198666193471	S
1996-06-17	0.001999	275.037081401	4.20147425267	81.886505127	Impr. Grass	169	-6.19040340972537	2.90920086825575	S
1996-06-19	0.001954	363.367017663	4.35099756199	93.671508789	Impr. Grass	171	-6.21261009575952	2.94362928089783	S
1996-06-19	0.000913	345.183718977	9.81228450249	135.442504883	Impr. Grass	171	-6.94545714616615	2.94362928089783	S
1996-06-18	0.002101	12	2.5	0	Impr. Grass	170	-6.14182242869654	2.92641507457679	S
1996-06-19	0.000615	350.209378939	6.77938055473	248.836746215	Impr. Grass	171	-7.31572351730842	2.94362928089783	S
1996-06-17	0.005435	261.000876427	4.34846591709	100.991989135	Impr. Grass	169	-5.20573818525494	2.90920086825575	S
1996-06-17	0.001576	280.964632171	5.60943251316	124.557266236	Impr. Grass	169	-6.42163226785652	2.90920086825575	S
1996-06-18	0.001048	424.647526633	7.99364133432	118.966247559	Impr. Grass	170	-6.8142649358948	2.92641507457679	S
1996-06-18	0.00108	406.80664346	6.40462359965	129.976257324	Less managed	170	-6.78553764625789	2.92641507457679	S
1996-06-20	0.001607	394.898065355	4.87493163106	122.271514893	Less managed	172	-6.40274654053771	2.96084348721887	S
1996-06-19	0.001051	403.636527998	7.13657678838	238.247497558	Impr. Grass	171	-6.81153642124159	2.94362928089783	S
1996-06-18	0.001103	427.287471532	6.39139623044	126.535491943	Less managed	170	-6.76538803769521	2.92641507457679	S
1996-06-19	0.000985	372.026368084	6.68443512741	195.703735352	Impr. Grass	171	-6.8733538522648	2.94362928089783	S
1996-06-19	0.000742	459.018753052	3.17760193348	0.973480224999946	Less managed	171	-7.14094916614985	2.94362928089783	S
1996-06-18	0.001521	393.461332103	7.07957180804	198.268005371	Less managed	170	-6.45604291970865	2.92641507457679	S
1996-06-17	0.001289	330.424801801	6.37030575002	128.53225708	Impr. Grass	169	-6.6158322122731	2.90920086825575	S
1996-06-19	0.001143	435.805804282	5.30720413768	111.919738769	Less managed	171	-6.73128413586636	2.94362928089783	S
1996-06-20	0.002241	433.550067174	6.86601220443	130.686279297	Less managed	172	-6.07876687551078	2.96084348721887	S
1996-06-17	0.001497	296.893521493	5.79885693984	165.694763183	Impr. Grass	169	-6.47143770739121	2.90920086825575	S
1996-06-18	0.000865	391.112759616	6.20475699418	183.056030274	Less managed	170	-6.99658649268875	2.92641507457679	S
1996-06-19	0.002331	418.088880141	7.00998489376	156.320495605	Less managed	171	-6.04023471147741	2.94362928089783	S
1996-06-18	0.001311	402.330332438	6.73987515767	5.17724609299995	Less managed	170	-6.59953555531281	2.92641507457679	S
1996-06-18	0.001645	390.942900901	7.25187064832	208.915771484	Less managed	170	-6.38007253814972	2.92641507457679	S
1996-06-18	0.004284	316.832497771	6.38241827903	104.819976806	Impr. Grass	170	-5.44126437586797	2.92641507457679	S
1996-06-17	0.00129	303.107198065	5.45633401216	169.155014038	Impr. Grass	169	-6.61508566501932	2.90920086825575	S
1996-06-19	0.001617	371.058766545	7.16828745442	246.248016358	Impr. Grass	171	-6.39672967521348	2.94362928089783	S
1996-06-18	0.005052	400	4	0	Impr. Grass	170	-5.27812265926252	2.92641507457679	S
1996-06-18	0.001979	334.900899042	4.74370863112	162.705993652	Impr. Grass	170	-6.20021221813846	2.92641507457679	S
1996-06-18	0.00146	374.144151682	6.11779291903	205.63949585	Impr. Grass	170	-6.4956456281553	2.92641507457679	S
1996-06-18	0.002014	297.713229531	4.63990143935	137.194274903	Impr. Grass	170	-6.18310943136282	2.92641507457679	S
1996-06-18	0.001034	396.457787601	6.10390633084	167.900756836	Impr. Grass	170	-6.82709737596468	2.92641507457679	S
1996-06-17	0.001603	328.908428519	5.44931136795	143.12802124	Impr. Grass	169	-6.40516346014325	2.90920086825575	S
1996-06-19	0.001258	386.108946644	8.31209290569	114.331237793	Impr. Grass	171	-6.63925602594713	2.94362928089783	S
1996-06-21	0.001434	390.119384732	8.84958739712	259.95199585	Impr. Grass	173	-6.51301413423695	2.97805769353991	S
1996-06-19	0.000643	400.080473787	5.8832164327	141.411987305	Impr. Grass	171	-7.27448055877437	2.94362928089783	S
1996-06-18	0.001632	309.861796022	4.61013625915	122.477005005	Impr. Grass	170	-6.38777171743138	2.92641507457679	S
1996-06-18	0.001278	260.767711721	4.57982889706	101.930480957	Impr. Grass	170	-6.62408122792789	2.92641507457679	S
1996-06-17	0.001133	383.133752089	4.97268820497	87.696472168	Impr. Grass	169	-6.73970169398589	2.90920086825575	S
1996-06-19	0.001016	269.772187991	4.58987549877	102.903259277	Impr. Grass	171	-6.84384195323848	2.94362928089783	S
1996-06-18	0.002873	226.248041091	6.07165801717	97.92098999	Impr. Grass	170	-5.83514479285303	2.92641507457679	S
1996-06-18	0.00149	253.632045351	8.58027644815	72.844741821	Impr. Grass	170	-6.4759728625566	2.92641507457679	S
1996-06-18	0.001269	269.29119555	6.13629076095	200.937744141	Impr. Grass	170	-6.63088140524696	2.92641507457679	S
1996-06-17	0.000793	338.029907019	6.97375364278	169.023254394	Impr. Grass	169	-7.07854359996242	2.90920086825575	S
1996-06-18	0.001262	201.164271211	3.84936374042	105.864746094	Impr. Grass	170	-6.63620258846024	2.92641507457679	S
1996-06-17	0.00073	328.920445461	10.3851960276	197.145477295	Less managed	169	-7.15621663828064	2.90920086825575	S
1996-06-18	0.002346	220.588610611	5.6024940212	98.298522949	Impr. Grass	170	-6.03395459872893	2.92641507457679	S
1996-06-19	0.002858	258.579308916	5.27517889189	101.101989746	Impr. Grass	171	-5.84028971931086	2.94362928089783	S
1996-06-18	0.001859	264.49813207	5.48858679748	58.010498047	Less managed	170	-6.26117573423853	2.92641507457679	S
1996-06-19	0.001771	243.843940258	5.38946537208	102.518493652	Impr. Grass	171	-6.30836947823667	2.94362928089783	S
1996-06-17	0.000957	353.959019979	5.83282751424	229.071746826	Less managed	169	-6.90077966524571	2.90920086825575	S
1996-06-18	0.001001	282.282402613	6.00689622104	225.236236572	Less managed	170	-6.85801318708732	2.92641507457679	S
1996-06-18	0.001213	210.947106557	3.28416351749	76.238754272	Impr. Grass	170	-6.67426543561378	2.92641507457679	S
1996-06-17	0.000725	305.475598145	5.3655976971	63.217254639	Impr. Grass	169	-7.16264752861093	2.90920086825575	S
1996-06-18	0.001573	234.019260536	4.8707295698	177.855743408	Impr. Grass	170	-6.42347899044968	2.92641507457679	S
1996-06-17	0.000818	303.522084554	1.54350130757	1.99972534200003	Impr. Grass	169	-7.04931884330392	2.90920086825575	S
1996-06-19	0.001875	197.953858532	4.59957612473	171.62223816	Impr. Grass	171	-6.25282931124239	2.94362928089783	S
1996-06-17	0.001336	358.718544801	9.0320922931	153.607757568	Less managed	169	-6.58133337821443	2.90920086825575	S
1996-06-20	0.001685	236.847951863	7.06221614442	179.289764405	Impr. Grass	172	-6.35674786558331	2.96084348721887	S
1996-06-18	0.001597	222.329820806	4.81111505236	88.007247925	Less managed	170	-6.40879982778663	2.92641507457679	S
1996-06-17	0.001579	262.427535849	8.63146317415	168.908508301	Impr. Grass	169	-6.41978894936223	2.90920086825575	S
1996-06-19	0.001003	240.597799128	7.69041674787	88.465499878	Impr. Grass	171	-6.8561120458303	2.94362928089783	S
1996-06-19	0.017519	193.116577784	5.52879062792	87.974243164	Arable	171	-4.04161929359922	2.94362928089783	S
1996-06-18	0.00292	276.664009652	3.35170748653	86.96949768	Impr. Grass	170	-5.81919332616753	2.92641507457679	S
1996-06-19	0.00372	251.329520874	5.16699132919	91.207244873	Impr. Grass	171	-5.58068027752222	2.94362928089783	S
1996-06-17	0.00106	288.241246759	9.30112478504	258.459228515	Less managed	169	-6.80339526365789	2.90920086825575	S
1996-06-18	0.002796	209.072140862	3.79700014872	57.973739624	Impr. Grass	170	-5.86184077931448	2.92641507457679	S
1996-06-18	0.012709	175.457030905	4.82007435991	95.075241089	Impr. Grass	170	-4.36151837404253	2.92641507457679	S
1996-06-18	0.001092	211.545830732	3.59245771295	86.59249878	Impr. Grass	170	-6.77497416774832	2.92641507457679	S
1996-06-19	0.01038	185.631337345	4.43720424566	184.860237122	Impr. Grass	171	-4.56306900996946	2.94362928089783	S
1996-06-17	0.000605	328.319647336	8.45403926011	212.713485718	Impr. Grass	169	-7.33087532232902	2.90920086825575	S
1996-06-19	0.003559	234.603760958	4.92077487358	122.931243897	Impr. Grass	171	-5.62432455332149	2.94362928089783	S
1996-06-18	0.001242	237.814753508	5.09146845285	149.390487671	Impr. Grass	170	-6.65156387362173	2.92641507457679	S
1996-06-17	0.001121	309.892402567	10.8856688097	200.085754395	Less managed	169	-6.74989719436656	2.90920086825575	S
1996-06-18	0.001372	243.794899043	5.78716025306	231.763748169	Impr. Grass	170	-6.55569094760109	2.92641507457679	S
1996-06-19	0.016214	228.880840947	4.98584457379	173.72227478	Impr. Grass	171	-4.11880120265609	2.94362928089783	S
1996-06-17	0.00065	364.370452653	5.24665575508	129.143981933	Less managed	169	-7.26443022292087	2.90920086825575	S
1996-06-18	0.001346	175.945480024	4.25998968273	147.682998658	Impr. Grass	170	-6.57414427464196	2.92641507457679	S
1996-06-19	0.000949	269.772187991	4.58987549877	102.903259277	Impr. Grass	171	-6.90875577931572	2.94362928089783	S
1996-06-26	0.0023	292.238886471	3.79326655594	111.039505005	Impr. Grass	178	-6.05333995082607	3.06412872514511	S
1996-06-24	0.002557	232.616748657	2.76912038684	33.03276062	Impr. Grass	176	-5.94955514403077	3.02970031250303	S
1996-06-22	0.002563	292.223794183	5.41627223824	109.483520508	Impr. Grass	174	-5.94725629244366	2.99527189986095	S
1996-06-20	0.008449	409.013368833	5.59354148457	170.022521972	Less managed	172	-4.76780676946565	2.96084348721887	S
1996-06-21	0.001834	368.130464681	5.28438391685	24.321746826	Impr. Grass	173	-6.27435810282797	2.97805769353991	S
1996-06-20	0.005319	490.21805603	4.01546362271	104.84375	Less managed	172	-5.22711360754171	2.96084348721887	S
1996-06-21	0.002656	352.208095775	5.98236154809	45.321472168	Impr. Grass	173	-5.91228374923354	2.97805769353991	S
1996-06-22	0.003516	304.990106868	3.36322393146	134.275024414	Impr. Grass	174	-5.63631075954119	2.99527189986095	S
1996-06-20	0.000822	470.820811482	7.3873413	196.372497558	Less managed	172	-7.04472113405529	2.96084348721887	S
1996-06-20	0.002451	462.962353929	7.38070355418	155.770507813	Less managed	172	-5.99106462708666	2.96084348721887	S
1996-06-22	0.001405	228.048420037	4.15704475476	104.231002808	Impr. Grass	174	-6.53274937835868	2.99527189986095	S
1996-06-20	0.001035	435.333807991	4.31335849907	78.222015381	Less managed	172	-6.82617529198971	2.96084348721887	S
1996-06-21	0.001016	386.478372574	9.78450545669	166.841766358	Less managed	173	-6.84384195323848	2.97805769353991	S
1996-06-22	0.001317	277.858641514	6.71936688682	127.286254882	Impr. Grass	174	-6.59513672124032	2.99527189986095	S
1996-06-20	0.001973	391.06824127	8.05298347628	83.131988526	Impr. Grass	172	-6.20317372079653	2.96084348721887	S
1996-06-21	0.000901	437.417060471	8.4039002493	148.51373291	Less managed	173	-6.95799649541888	2.97805769353991	S
1996-06-22	0.001412	251.467887243	6.80082728993	195.92501831	Impr. Grass	174	-6.52794991765455	2.99527189986095	S
1996-06-24	0.002105	302.660074976	10.9700682842	104.147994995	Impr. Grass	176	-6.13996455542643	3.02970031250303	S
1996-06-20	0.000777	496.856463808	7.39255410433	120.250488281	Less managed	172	-7.09770586294058	2.96084348721887	S
1996-06-22	0.00125	277.570497178	4.6502291897	183.202758789	Impr. Grass	174	-6.64539101451465	2.99527189986095	S
1996-06-21	0.00405	389.001619466	5.6491945982	20.989013672	Impr. Grass	173	-5.49676830527187	2.97805769353991	S
1996-06-22	0.000958	297.716629831	4.85317832388	131.851531982	Impr. Grass	174	-6.89978710933296	2.99527189986095	S
1996-06-21	0.002069	364.389086095	10.3943207729	106.656738281	Less managed	173	-6.15681099969598	2.97805769353991	S
1996-06-22	0.004595	346.009730109	3.81159859485	94.997009278	Impr. Grass	174	-5.37196390671633	2.99527189986095	S
1996-06-22	0.00155	243.810421021	4.3461937525	167.789733886	Impr. Grass	174	-6.4377516497364	2.99527189986095	S
1996-06-26	0.002839	246.711638302	4.28187057243	120.428756714	Impr. Grass	178	-5.84684485749804	3.06412872514511	S
1996-06-21	0.002873	425.133333393	9.85082194268	159.871246338	Less managed	173	-5.83514479285303	2.97805769353991	S
1996-06-20	0.000622	453.553391341	6.89936835098	136.852020264	Less managed	172	-7.30525221744112	2.96084348721887	S
1996-06-21	0.00178	344.827802609	8.43405985565	145.700500488	Less managed	173	-6.30343931212881	2.97805769353991	S
1996-06-20	0.001161	427.421829224	5.76513253739	106.841766357	Impr. Grass	172	-6.71630881441118	2.96084348721887	S
1996-06-20	0.000341	416.10525083	7.07418629496	188.584747314	Impr. Grass	172	-7.84680299797891	2.96084348721887	S
1996-06-21	0.002654	435.654226488	9.63512189158	136.580474853	Less managed	173	-5.91302312080142	2.97805769353991	S
1996-06-20	0.000595	486.526814671	4.93690035249	113.600219727	Less managed	172	-7.3462602411685	2.96084348721887	S
1996-06-21	3e-06	439.498033519	10.0698430153	183.199768067	Less managed	173	-9.84521864441215	2.97805769353991	S
1996-06-21	0.001122	391.046502186	9.963466878	230.766510009	Less managed	173	-6.74904358782732	2.97805769353991	S
1996-06-22	0.000714	279.946662609	4.21525165668	127.636779785	Impr. Grass	174	-7.17694276879775	2.99527189986095	S
1996-06-20	0.001845	243.187632109	11.8954848741	102.692001343	Impr. Grass	172	-6.26853644044775	2.96084348721887	S
1996-06-20	0.007843	219.409892758	6.01208521523	75.834732056	Impr. Grass	172	-4.84177898825587	2.96084348721887	S
1996-06-19	0.001689	221.182657578	4.89445374468	185.979515076	Impr. Grass	171	-6.35444504360999	2.94362928089783	S
1996-06-20	0.001924	251.301745794	7.14703730402	116.691253662	Impr. Grass	172	-6.22769333797085	2.96084348721887	S
1996-06-21	0.002054	207.018671623	5.81476131652	230.961502075	Impr. Grass	173	-6.16391498410667	2.97805769353991	S
1996-06-20	0.00217	261.407116036	5.95581050389	138.753509522	Impr. Grass	172	-6.11024808309795	2.96084348721887	S
1996-06-26	0.001697	192.439816463	2.93696999296	79.635009766	Impr. Grass	178	-6.34985524783022	3.06412872514511	S
1996-06-25	0.003323	216.736756035	3.41250392179	64.939743042	Impr. Grass	177	-5.69195272290262	3.04691451882407	S
1996-06-25	0.003686	272.937795761	6.31481317441	198.885498047	Impr. Grass	177	-5.58973975861554	3.04691451882407	S
1996-06-26	0.002695	200.674783939	3.78008086125	65.108505249	Impr. Grass	178	-5.89797420402064	3.06412872514511	S
1996-06-25	0.001656	195.964396229	4.23127780334	105.085266113	Impr. Grass	177	-6.37360382991265	3.04691451882407	S
1996-06-25	0.004341	218.814479757	3.06129515475	74.540237427	Impr. Grass	177	-5.42819828740256	3.04691451882407	S
1996-06-25	0.006906	213.288402628	3.69581093055	95.909988404	Impr. Grass	177	-4.9681506824901	3.04691451882407	S
1996-06-27	0.003358	279.281513987	7.09950919091	113.698501587	Impr. Grass	179	-5.68162967001507	3.08134293146615	S
1996-06-25	0.003583	258.671360348	5.8393162403	188.011245728	Impr. Grass	177	-5.61769652574307	3.04691451882407	S
1996-06-26	0.001841	194.471877896	1.96555344912	26.319992065	Impr. Grass	178	-6.27064948930582	3.06412872514511	S
1996-06-26	0.001144	228.826392167	5.1406188917	168.805267334	Impr. Grass	178	-6.73044626401173	3.06412872514511	S
1996-06-25	0.000798	176.117585743	3.84328689602	95.651748657	Impr. Grass	177	-7.07262992217237	3.04691451882407	S
1996-06-25	0.001714	269.058776385	5.35484543718	155.325744629	Impr. Grass	177	-6.34017132139754	3.04691451882407	S
1996-06-25	0.002015	280.005942892	5.7858925017	177.960998535	Impr. Grass	177	-6.18262505256914	3.04691451882407	S
1996-06-25	0.001128	219.35953321	6.1453406616	57.139007568	Impr. Grass	177	-6.74393719375274	3.04691451882407	S
1996-06-25	0.002436	256.129082712	6.18919471685	201.986755371	Impr. Grass	177	-5.99708028589362	3.04691451882407	S
1996-06-26	0.003863	225.922911105	1.94566443044	29.055252076	Arable	178	-5.54345093575386	3.06412872514511	S
1996-06-25	0.002292	243.828077473	4.41820221347	121.903259277	Impr. Grass	177	-6.05675001380661	3.04691451882407	S
1996-06-25	0.001861	235.29562764	5.0123496256	213.768493652	Impr. Grass	177	-6.260128613724	3.04691451882407	S
1996-06-25	0.002996	218.974916712	3.92690330942	60.279251098	Impr. Grass	177	-5.79392602450917	3.04691451882407	S
1996-06-26	0.005136	298.487732387	5.27022542635	99.201263427	Impr. Grass	178	-5.26179259186566	3.06412872514511	S
1996-06-25	0.001866	262.253469946	6.14391734087	215.570251465	Impr. Grass	177	-6.25751559943347	3.04691451882407	S
1996-06-25	0.008366	219.859225384	2.75983571442	66.055999756	Impr. Grass	177	-4.77762062298678	3.04691451882407	S
1996-06-25	0.002772	285.044541921	4.23804516745	91.829742432	Impr. Grass	177	-5.87030942555151	3.04691451882407	S
1996-06-24	0.00102	125.598873925	5.90119730607	57.627746582	Impr. Grass	176	-6.84009663050832	3.02970031250303	S
1996-06-25	0.00153	323.247516936	2.49672988027	74.708251954	Less managed	177	-6.45033043194326	3.04691451882407	S
1996-06-25	0.000416	311.782839193	2.76331085766	132.473495483	Less managed	177	-7.67132492383863	3.04691451882407	S
1996-06-24	0.010226	156.955748945	5.08522010258	113.285247803	Less managed	176	-4.5779441997345	3.02970031250303	S
1996-06-25	0.001587	256.242062632	4.36752727526	121.195983886	Impr. Grass	177	-6.41488998059314	3.04691451882407	S
1996-06-24	0.000904	150.58812123	4.21606314182	58.78174591	Impr. Grass	176	-6.95484688651599	3.02970031250303	S
1996-06-25	0.001125	277.554970947	3.98122672784	107.806015014	Less managed	177	-6.74648713138602	3.04691451882407	S
1996-06-24	0.002726	196.732401936	5.01771377201	88.40625	Impr. Grass	176	-5.88674423633758	3.02970031250303	S
1996-06-24	0.004275	253.311376753	6.12920310397	131.374755859	Impr. Grass	176	-5.44334313859829	3.02970031250303	S
1996-06-24	0.001635	242.115599206	7.89444136929	146.226745606	Impr. Grass	176	-6.38598971517781	3.02970031250303	S
1996-06-25	0.007142	273.896038109	4.26499486038	121.128250122	Impr. Grass	177	-4.93478598181282	3.04691451882407	S
1996-06-24	0.002863	244.650513478	4.66062994798	116.733489991	Impr. Grass	176	-5.83857180100484	3.02970031250303	S
1996-06-25	0.001088	304.580730425	4.18223903843	133.760757447	Less managed	177	-6.778482943278	3.04691451882407	S
1996-06-24	0.00171	219.968553242	4.70799994469	35.852508545	Arable	176	-6.34244146993208	3.02970031250303	S
1996-06-24	0.003607	161.445866081	4.18506714858	145.0655059815	Impr. Grass	176	-5.61111213981489	3.02970031250303	S
1996-06-24	0.002025	189.495274511	4.7616022753	205.339508057	Impr. Grass	176	-6.17779412529948	3.02970031250303	S
1996-06-25	0.001164	286.669131394	3.84294349803	132.570266724	Impr. Grass	177	-6.71383458634483	3.04691451882407	S
1996-06-25	0.00244	292.054996593	3.140628055	74.775497436	Impr. Grass	177	-5.99547256850552	3.04691451882407	S
1996-06-24	0.002791	277.583822308	3.38775109372	85.397247314	Impr. Grass	176	-5.86359917611009	3.02970031250303	S
1996-06-25	0.001086	323.247516936	2.49672988027	74.708251954	Less managed	177	-6.78024195868318	3.04691451882407	S
1996-06-24	0.002144	241.761968982	4.27842258784	173.191253662	Impr. Grass	176	-6.1220289171291	3.02970031250303	S
1996-06-27	0.002215	275.611108046	4.59251433784	174.054260254	Impr. Grass	179	-6.09018052004714	3.08134293146615	S
1996-06-17	0.002861	302.257511684	6.64434584549	110.871231079	Impr. Grass	169	-5.83925861421865	2.90920086825575	S
1996-06-27	0.002266	208.231299326	7.42924526	157.718002319	Impr. Grass	179	-6.06791371927139	3.08134293146615	S
1996-06-27	0.003746	165.478719711	9.3280992806	84.10925293	Impr. Grass	179	-5.57380739823446	3.08134293146615	S
1996-06-17	0.00095	306.775118899	5.34143260457	141.07925415	Impr. Grass	169	-6.90775527898214	2.90920086825575	S
1996-06-27	0.001408	210.085321844	4.96325277604	109.661514282	Impr. Grass	179	-6.53068964539567	3.08134293146615	S
1996-06-17	0.002871	333.889289044	4.6919137227	85.989501953	Impr. Grass	169	-5.83582925557653	2.90920086825575	S
1996-06-19	0.001501	436.105635739	5.09174909563	80.758758545	Impr. Grass	171	-6.46885539478774	2.94362928089783	S
1996-06-27	0.001388	210.227075195	7.28858642986	182.143249511	Impr. Grass	179	-6.54450201968328	3.08134293146615	S
1996-06-27	0.006861	223.030874612	4.06224172228	78.327758789	Impr. Grass	179	-4.97464093387288	3.08134293146615	S
1996-06-27	0.002803	161.90749766	6.57242337863	62.884506226	Impr. Grass	179	-5.85938420675077	3.08134293146615	S
1996-06-27	0.000946	237.814633898	7.11726300845	125.275268555	Impr. Grass	179	-6.91176330037968	3.08134293146615	S
1996-06-17	0.001629	331.606349526	3.03196476917	74.522766114	Impr. Grass	169	-6.38955690088673	2.90920086825575	S
1996-06-27	0.00118	155.333943294	7.32949645703	44.869506836	Impr. Grass	179	-6.70074110959781	3.08134293146615	S
1996-06-27	0.002133	207.043310855	9.73670021776	135.096008301	Less managed	179	-6.12705520141433	3.08134293146615	S
1996-06-27	0.001293	248.36880568	4.53582102411	99.128997803	Impr. Grass	179	-6.61284936144104	3.08134293146615	S
1996-06-17	0.000533	296.45707815	6.36310975925	168.25050354	Impr. Grass	169	-7.44732337161378	2.90920086825575	S
1996-06-26	0.014488	313.081966185	3.31123253842	96.640228271	Less managed	178	-4.23098936791969	3.06412872514511	S
1996-06-27	0.000825	289.657685703	12.1634417656	216.316497803	Impr. Grass	179	-7.04128667160666	3.08134293146615	S
1996-06-27	0.00269	400.585367743	4.11425419723	144.270751953	Less managed	179	-5.89979735858216	3.08134293146615	S
1996-06-26	0.00078	280.885185758	4.88611980393	198.51675415	Impr. Grass	178	-7.09408485717363	3.06412872514511	S
1996-06-25	0.001679	283.664998548	3.58067354817	59.986480713	Impr. Grass	177	-6.36021207228098	3.04691451882407	S
1996-06-27	0.00666	186.881979655	5.30610276092	103.261245728	Impr. Grass	179	-5.00415632799855	3.08134293146615	S
1996-06-26	0.007434	192.399606759	7.46286384524	133.239242554	Impr. Grass	178	-4.89498787057029	3.06412872514511	S
1996-06-26	0.001935	330.728662109	2.98629125936	76.037994385	Less managed	178	-6.22213636484298	3.06412872514511	S
1996-06-27	0.002182	426.867514424	2.13856439618	16.854522705	Less managed	179	-6.10485723446307	3.08134293146615	S
1996-06-25	0.00111	242.783839044	9.52910579496	191.427001953	Impr. Grass	177	-6.75933527386386	3.04691451882407	S
1996-06-26	0.004123	337.047903323	4.85986849885	76.745239258	Impr. Grass	178	-5.47912007737272	3.06412872514511	S
1996-06-25	0.012328	262.909747741	6.87891931848	220.550750732	Impr. Grass	177	-4.39183457566497	3.04691451882407	S
1996-06-26	0.000754	311.368703837	4.93057772709	214.482513427	Less managed	178	-7.12591128878531	3.06412872514511	S
1996-06-27	0.001755	406.884685082	3.66498660495	136.918762207	Less managed	179	-6.31719468719729	3.08134293146615	S
1996-06-26	0.004059	367.6949879	2.42277698556	60.751220703	Less managed	178	-5.49457558908086	3.06412872514511	S
1996-06-25	0.001978	232.515440668	7.65452106839	239.886001587	Impr. Grass	177	-6.2007051932532	3.04691451882407	S
1996-06-27	0.005019	416.414179385	2.1527886262	81.171752929	Less managed	179	-5.28461171949192	3.08134293146615	S
1996-06-27	0.001065	354.221422973	9.03091293796	228.910247802	Less managed	179	-6.79890087407006	3.08134293146615	S
1996-06-27	0.001317	344.206237977	7.53534319834	257.520233154	Less managed	179	-6.59513672124032	3.08134293146615	S
1996-06-27	0.00114	270.523694925	10.0039456171	209.381988525	Impr. Grass	179	-6.7338019718587	3.08134293146615	S
1996-06-27	0.000811	340.096305903	7.56357842182	222.007232666	Less managed	179	-7.05741605353654	3.08134293146615	S
1996-06-27	0.00063	411.095421011	5.77024349977	123.563018799	Less managed	179	-7.29341775979412	3.08134293146615	S
1996-07-02	0.000296	499.336288009	6.11153225248	124.919250488	Less managed	184	-7.96907178290655	3.16741396307135	S
1996-07-10	0.004261	127.282072617	3.03405195379	41.349510192	Arable	192	-5.44658538321714	3.30512761363967	S
1996-07-05	0.004236	25.9925233752	1.32732982204	40.8790016175	Arable	187	-5.45240138193075	3.21905658203447	S
1996-07-12	0.007084	133.217599146	3.00474947599	59.137496948	Arable	194	-4.94288319204544	3.33955602628175	S
1996-07-11	0.00262	179.991739777	4.07859690453	93.103752136	Suburban	193	-5.92567680656998	3.32234181996071	S
1996-07-13	0.001902	141.326915598	2.74023619401	61.153251648	Arable	195	-6.23890079099124	3.35677023260279	S
1996-07-10	0.001018	169.553110705	4.16039911242	39.234512329	Impr. Grass	192	-6.84196753844413	3.30512761363967	S
1996-07-13	0.003016	143.909855935	2.72049933339	60.228744507	Arable	195	-5.78738149853251	3.35677023260279	S
1996-07-11	0.005351	165.717773102	4.68580809955	136.6647491451	Arable	193	-5.22117115737138	3.32234181996071	S
1996-07-10	0.001286	159.016733544	6.00452625089	102.365249634	Impr. Grass	192	-6.61807520386768	3.30512761363967	S
1996-07-11	0.002078	171.220431563	4.09127510747	113.235748291	Impr. Grass	193	-6.15257270750274	3.32234181996071	S
1996-07-11	0.002187	174.771531035	3.75791123013	109.428009033	Arable	193	-6.10261959647414	3.32234181996071	S
1996-07-13	0.003382	134.48350504	3.22490664142	62.7920074459	Arable	195	-5.67461209735642	3.35677023260279	S
1996-07-11	0.004377	150.234593403	5.04339267243	99.970245361	Arable	193	-5.42003312523213	3.32234181996071	S
1996-07-11	0.00598	155.658274301	4.02788006408	139.2157440189	Arable	193	-5.11100826824304	3.32234181996071	S
1996-07-08	0.002209	70.3198259815	1.86480827216	89.5560035707	Arable	190	-6.09283304149627	3.27069920099759	S
1996-07-09	0.001792	50.4693785373	2.07572511721	60.1732482911	Arable	191	-6.29690334114902	3.28791340731863	S
1996-07-08	0.001863	82.4297136354	2.24932275806	81.9562530519	Arable	190	-6.25908258852402	3.27069920099759	S
1996-07-09	0.002721	26.599477493	2.18706985516	50.0690002441	Arable	191	-5.8885470131013	3.28791340731863	S
1996-07-08	0.014269	111.351875211	1.60891898013	21.9485015869	Arable	190	-4.24616795229027	3.27069920099759	S
1996-07-08	0.00032	106.461662373	1.40375534498	34.7254943846	Arable	190	-7.902007552326	3.27069920099759	S
1996-07-08	0.010479	52.8307658831	2.06473884545	26.2609977723	Arable	190	-4.55362192410751	3.27069920099759	S
1996-07-11	0.010566	4.37502629506	0.282722879087	1.83299994468	Arable	193	-4.54539298195223	3.32234181996071	S
1996-07-08	0.002127	119.3436528	2.44946259179	76.6164932252	Arable	190	-6.12980749672973	3.27069920099759	S
1996-07-08	0.00358	113.098019422	2.63187633532	88.2749938966	Arable	190	-5.61852263070538	3.27069920099759	S
1996-07-08	0.004224	104.408580695	1.95741002176	30.8600006108	Arable	190	-5.45520512208518	3.27069920099759	S
1996-07-08	0.006929	119.674960709	2.13370203906	41.4950027463	Arable	190	-4.96484963894712	3.27069920099759	S
1996-07-09	0.002174	19.4769116944	0.666100392885	6.3997497559	Arable	191	-6.1084479025938	3.28791340731863	S
1996-07-08	0.001189	114.891684005	2.36207838375	69.0697479249	Arable	190	-6.69345067633513	3.27069920099759	S
1996-07-09	0.002158	19.4769116944	0.666100392885	6.3997497559	Arable	191	-6.11566815056729	3.28791340731863	S
1996-07-12	0.001357	139.289043069	5.29853825178	89.8872604367	Arable	194	-6.56629550084989	3.33955602628175	S
1996-07-15	0.004126	164.968952933	3.3366543459	78.645248413	Arable	197	-5.4784014284018	3.39119864524487	S
1996-07-13	0.002315	136.340241343	1.96158365397	36.416000366	Arable	195	-6.04697725703824	3.35677023260279	S
1996-07-15	0.006038	135.433602153	2.26207842111	76.054252624	Arable	197	-5.10143565842275	3.39119864524487	S
1996-07-15	0.005297	161.678408833	4.46362369578	61.987747192	Arable	197	-5.23121962301554	3.39119864524487	S
1996-07-12	0.003841	124.366552505	3.2394431869	70.4072494505	Arable	194	-5.54908908497972	3.33955602628175	S
1996-07-12	0.001894	154.388765861	4.18413774138	57.538749695	Arable	194	-6.24300757294389	3.33955602628175	S
1996-07-15	0.005685	173.025423843	2.78937230978	65.627761841	Arable	197	-5.1611675284008	3.39119864524487	S
1996-07-17	0.001151	163.071233961	3.54549253025	61.07925415	Arable	199	-6.72460073588429	3.42562705788695	S
1996-07-16	0.002784	164.072362881	4.0816490497	87.120758056	Arable	198	-5.86606613771365	3.40841285156591	S
1996-07-13	0.007318	134.944182239	2.38911610089	34.470993042	Arable	195	-4.91060898002913	3.35677023260279	S
1996-07-13	0.001719	136.89218842	2.88528387662	72.71975708	Arable	195	-6.33734086380449	3.35677023260279	S
[truncated: 1,022 more rows]
