# Supplementary figures and images for: A model of potential carbon dioxide efflux from surface water across England and Wales using headwater stream survey data and landscape predictors
Source: Copernicus journal article supplement (doi:10.5194/bg-11-1911-2014), 2014-04-08

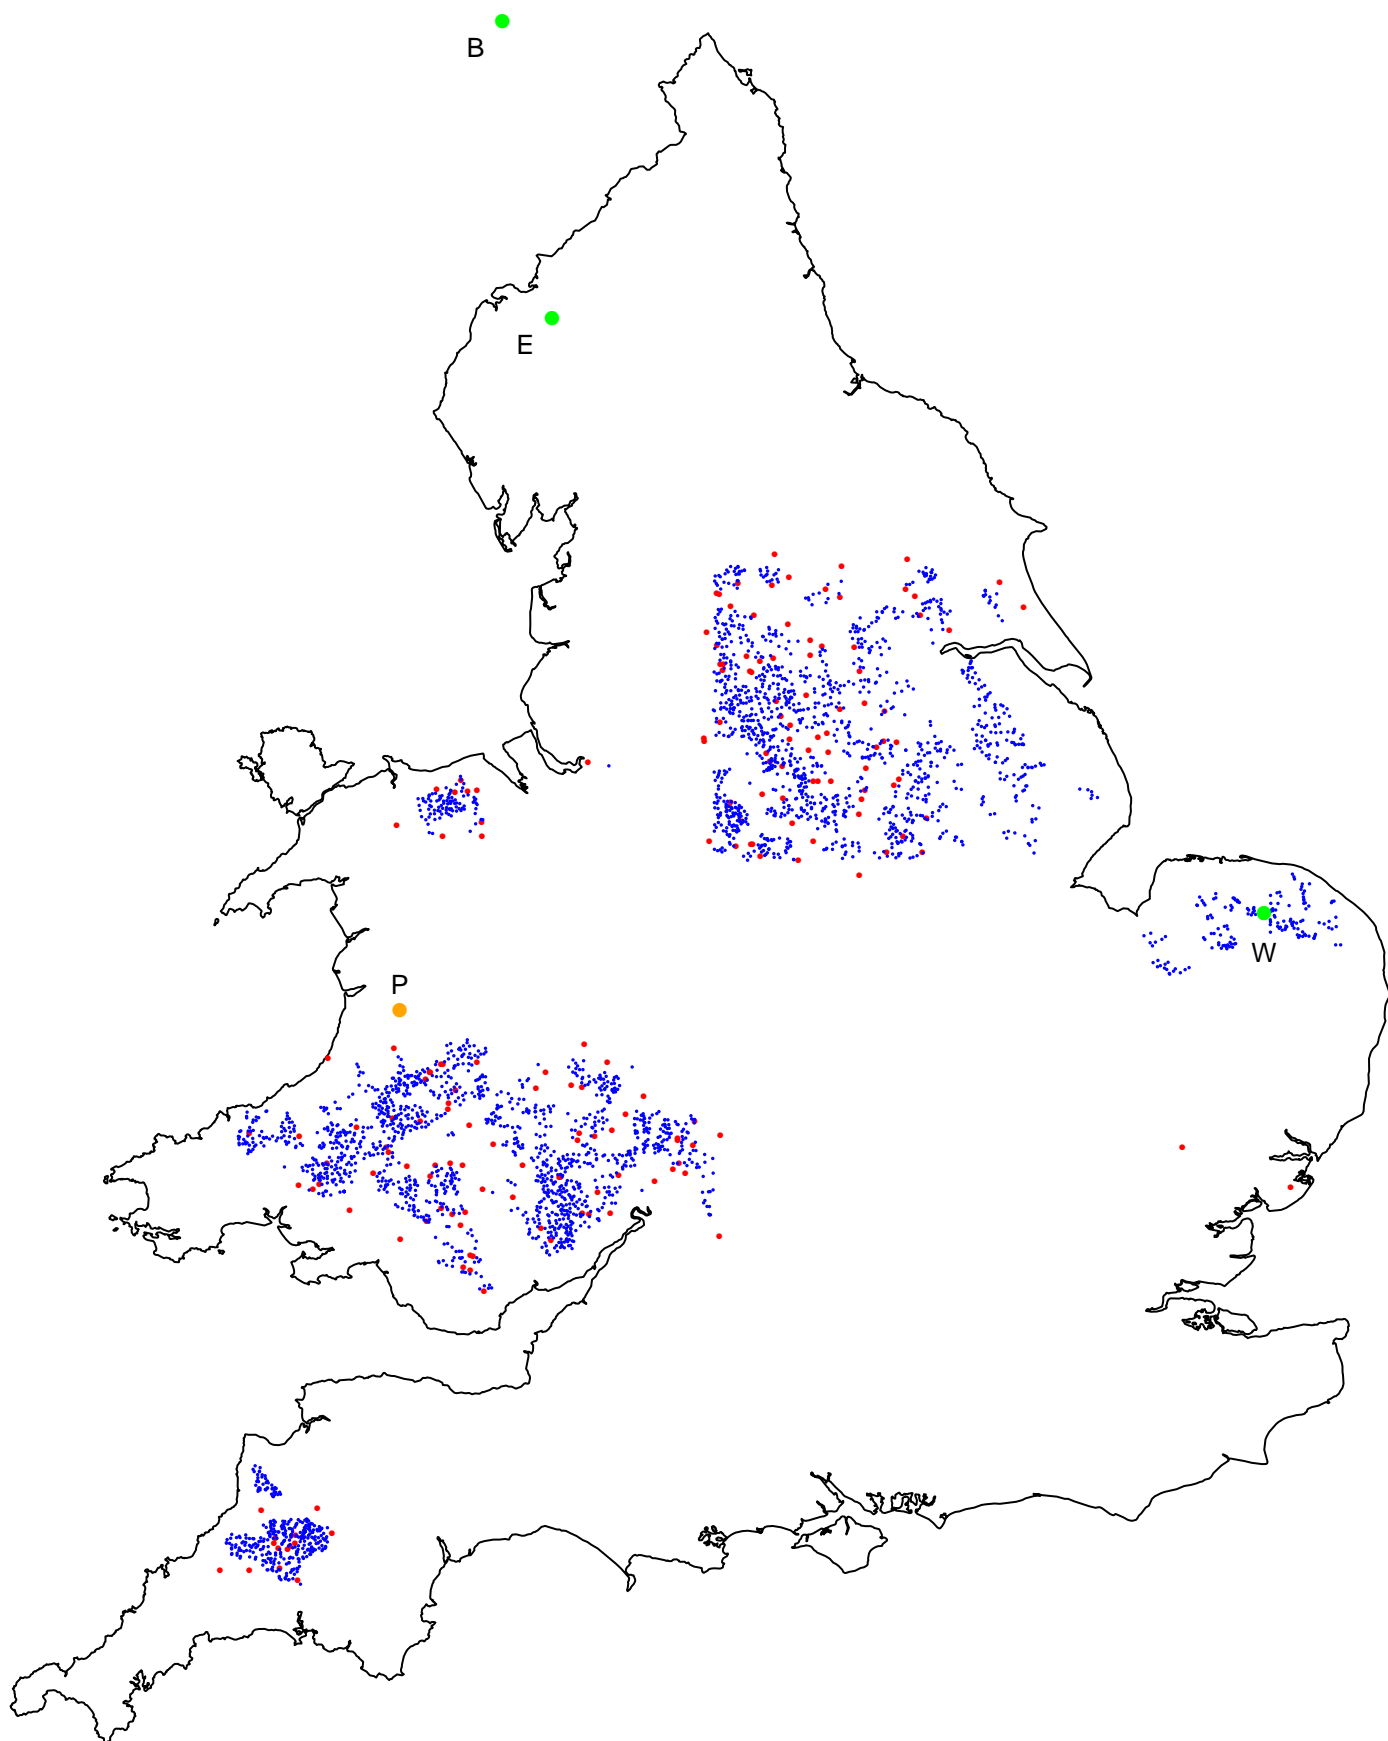

Supplement: Supplementary file 1 [file bg-11-1911-2014-supplement.zip › Fig1.pdf]

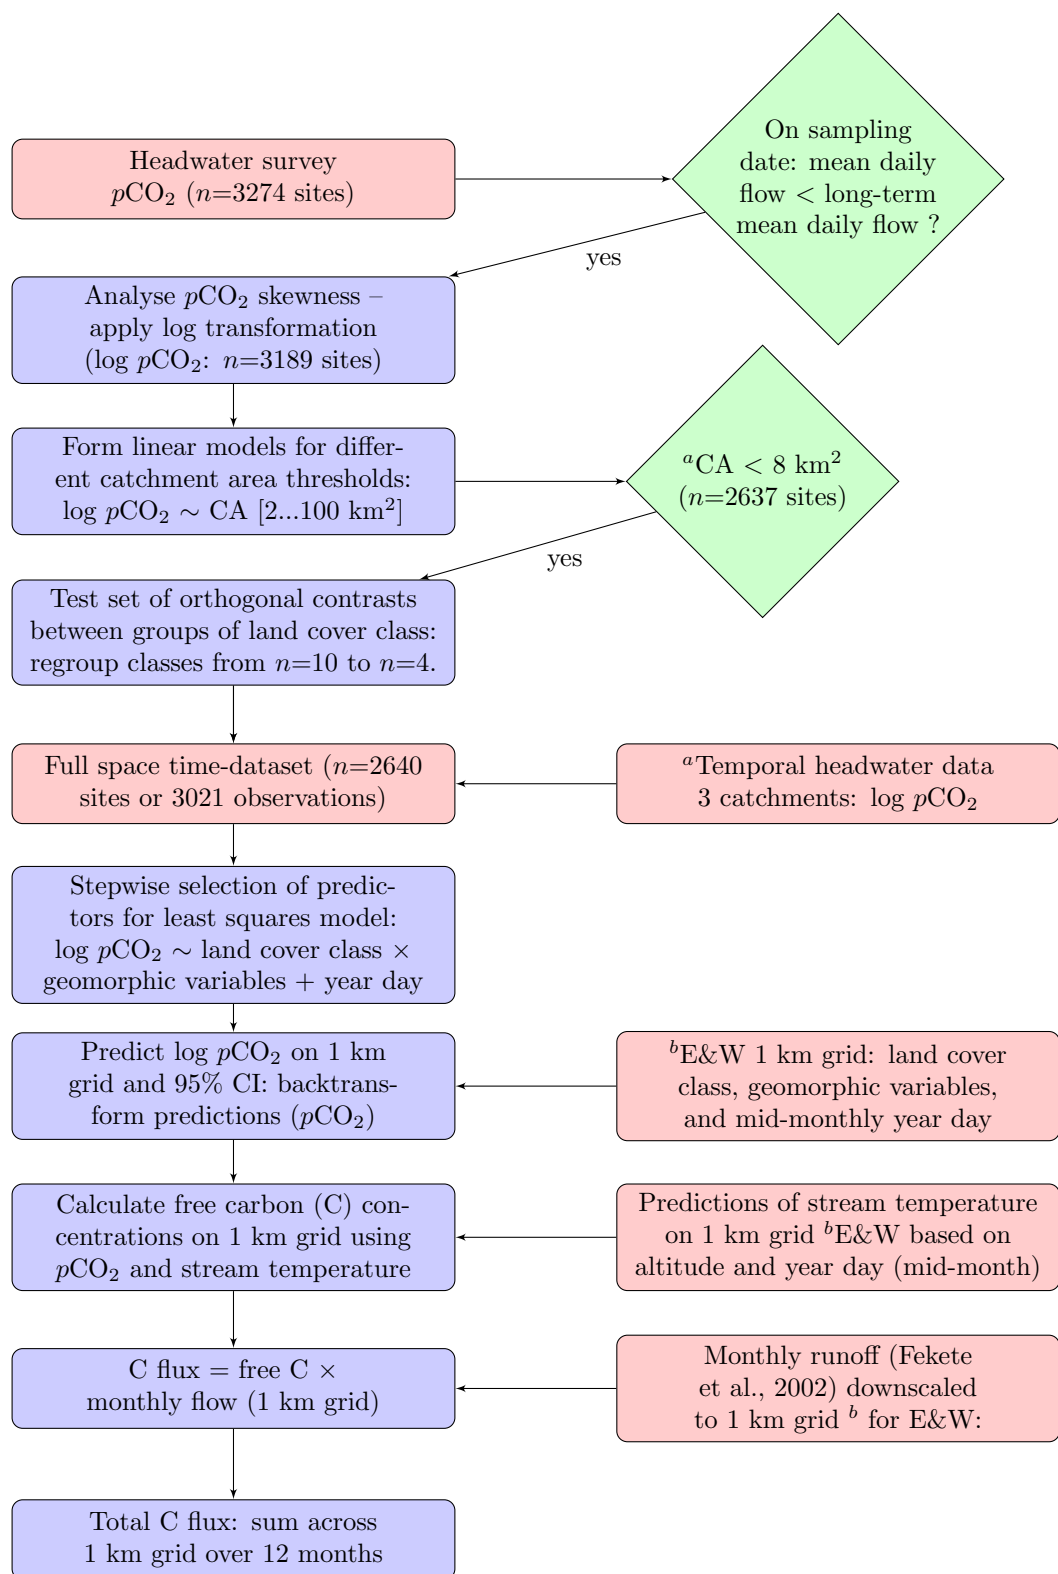

Supplement: Supplementary file 1 [file bg-11-1911-2014-supplement.zip › Fig2.pdf]

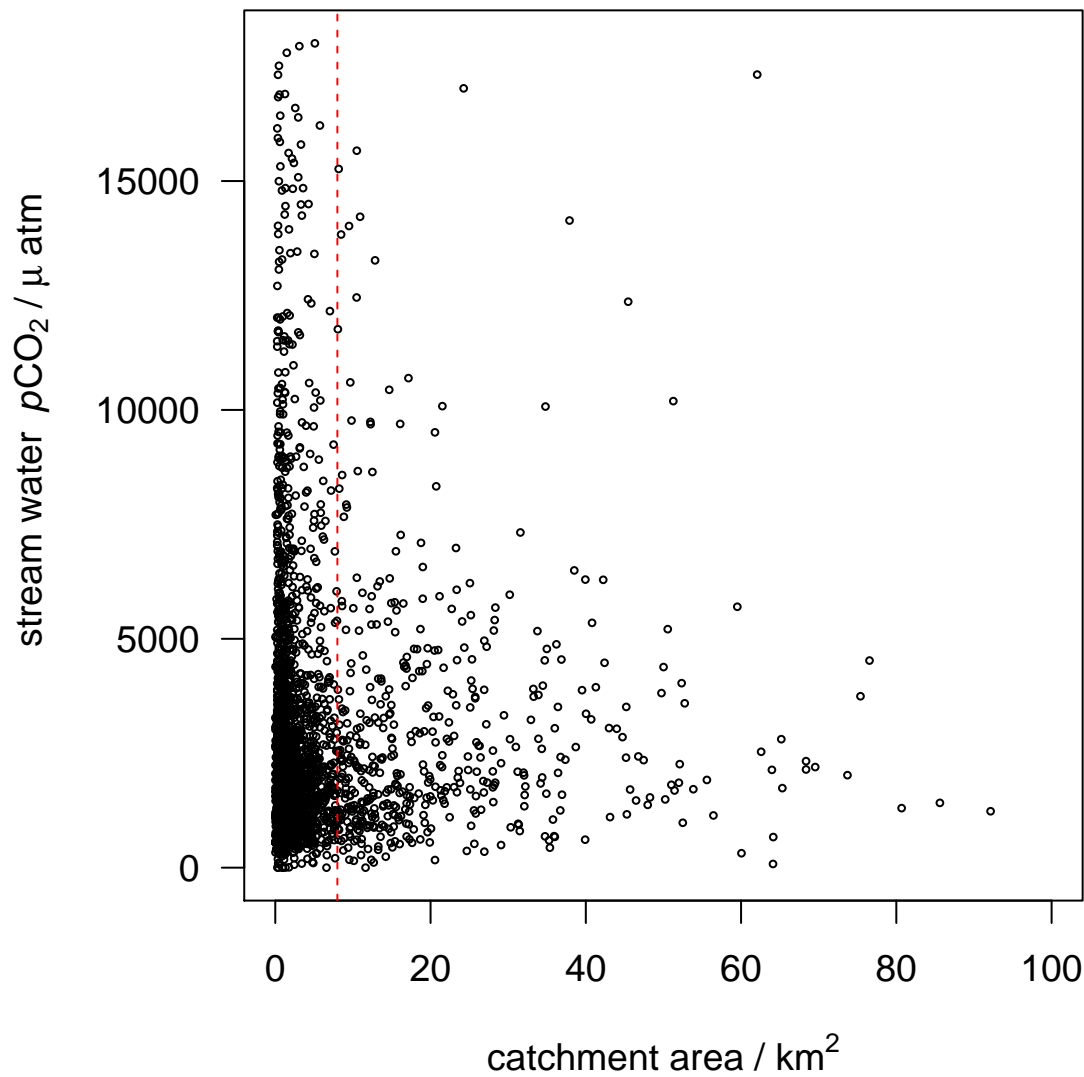

Supplement: Supplementary file 1 [file bg-11-1911-2014-supplement.zip › Fig3.pdf]

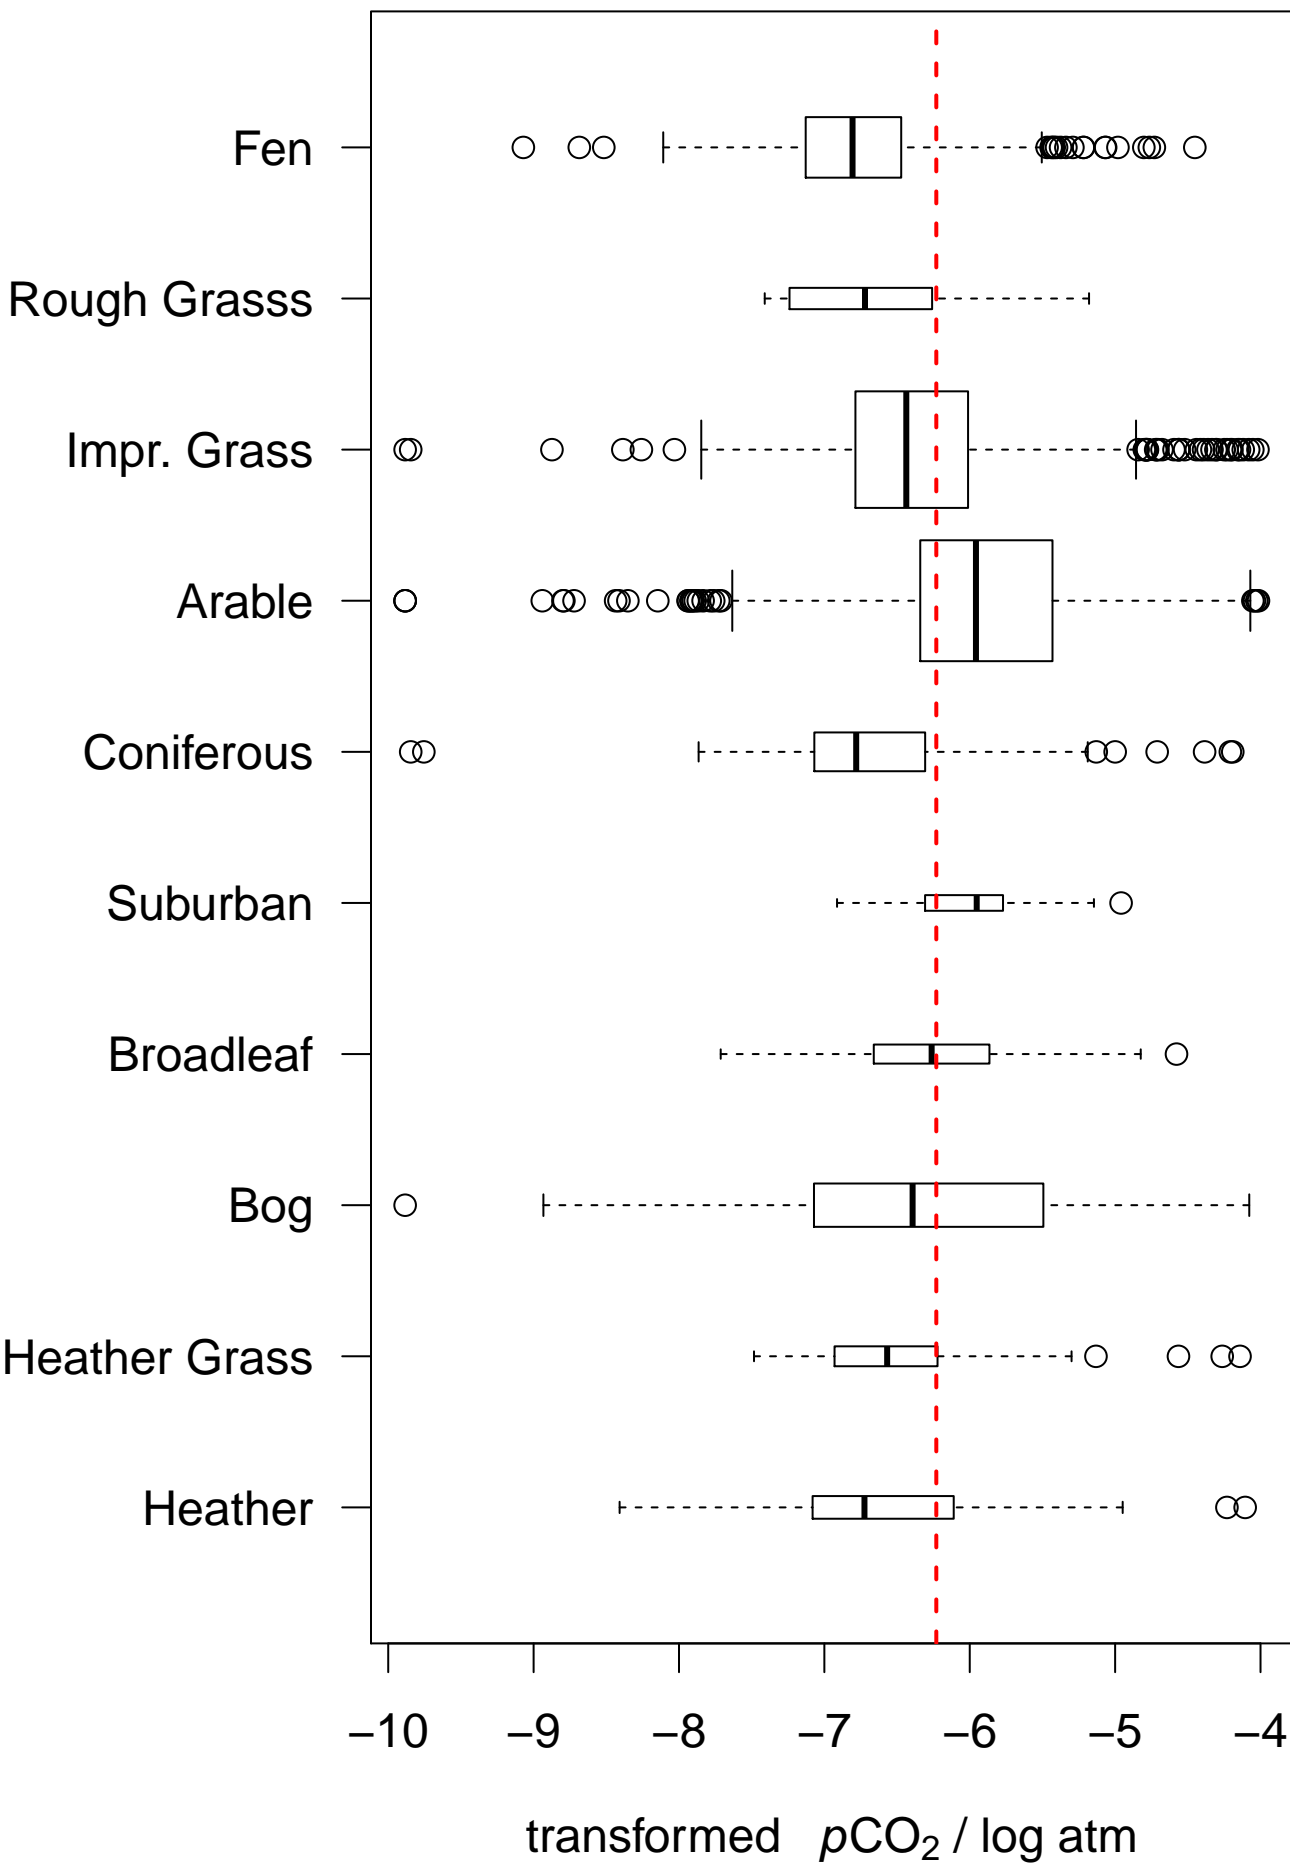

Supplement: Supplementary file 1 [file bg-11-1911-2014-supplement.zip › Fig4.pdf]

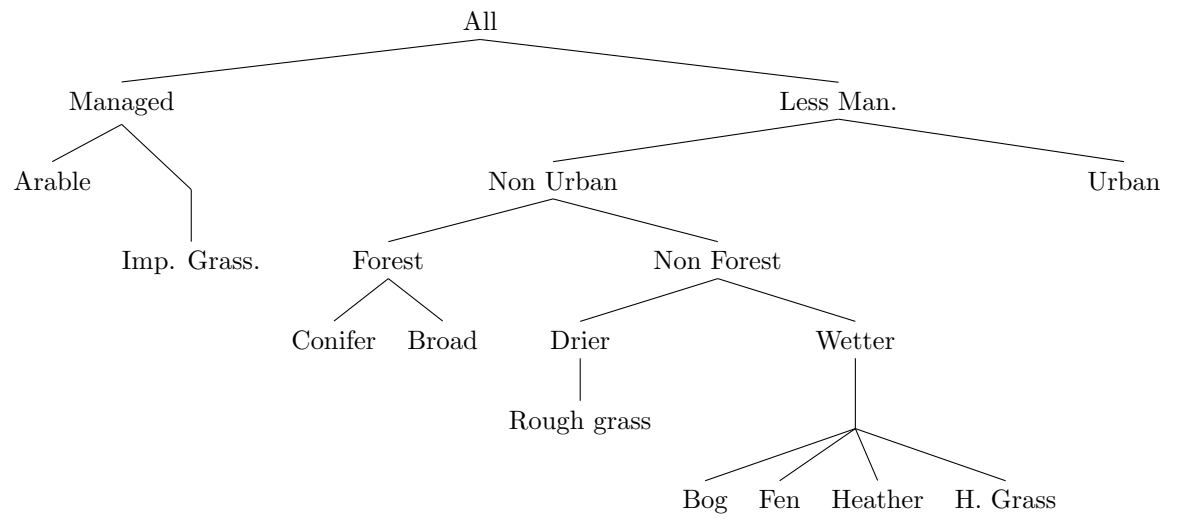

Supplement: Supplementary file 1 [file bg-11-1911-2014-supplement.zip › Fig5.pdf]

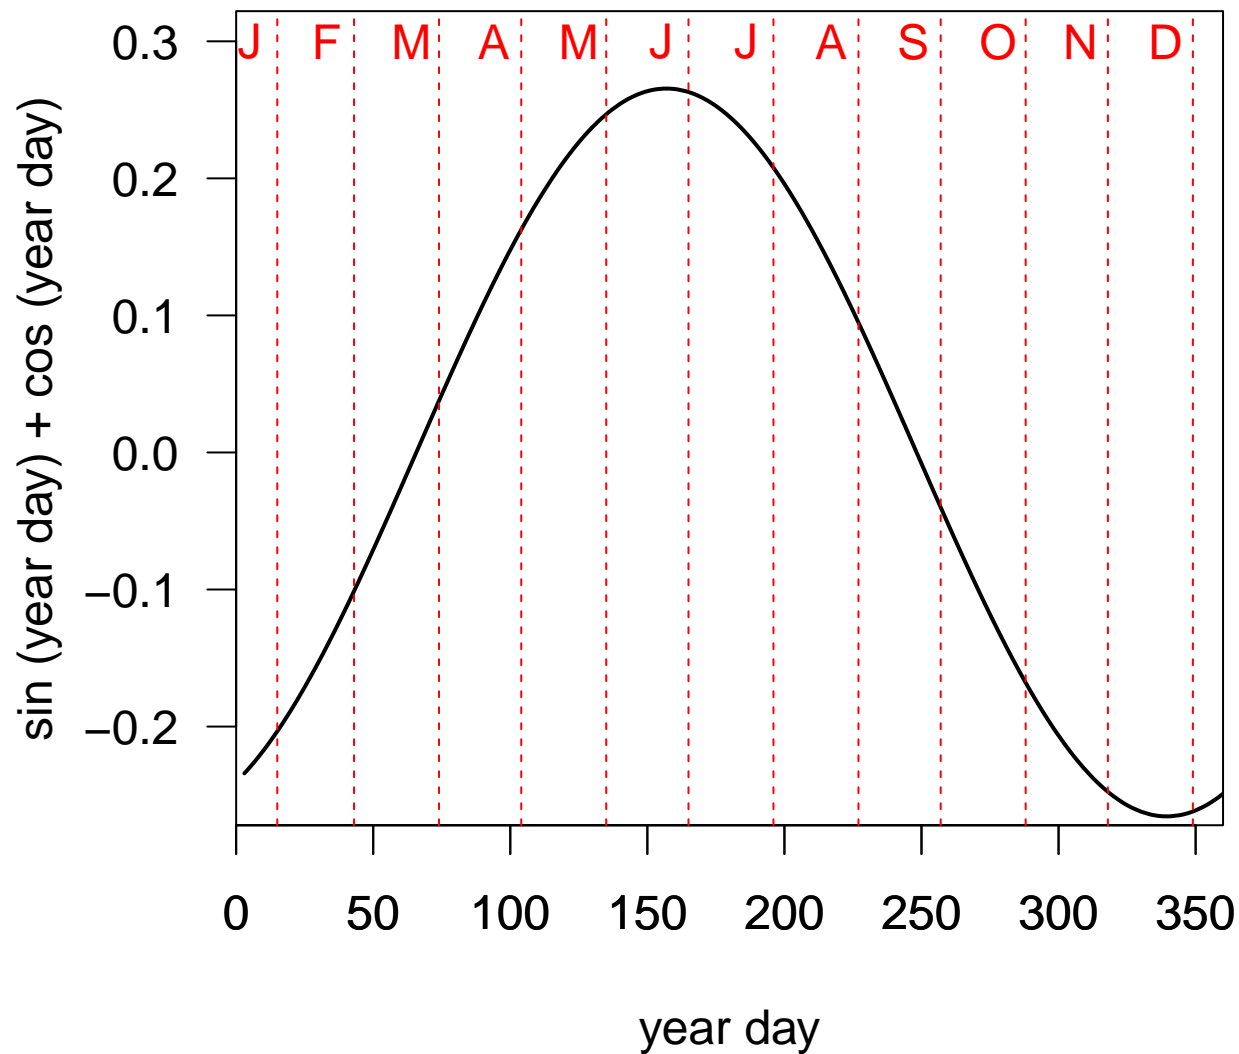

Supplement: Supplementary file 1 [file bg-11-1911-2014-supplement.zip › Fig7.pdf]

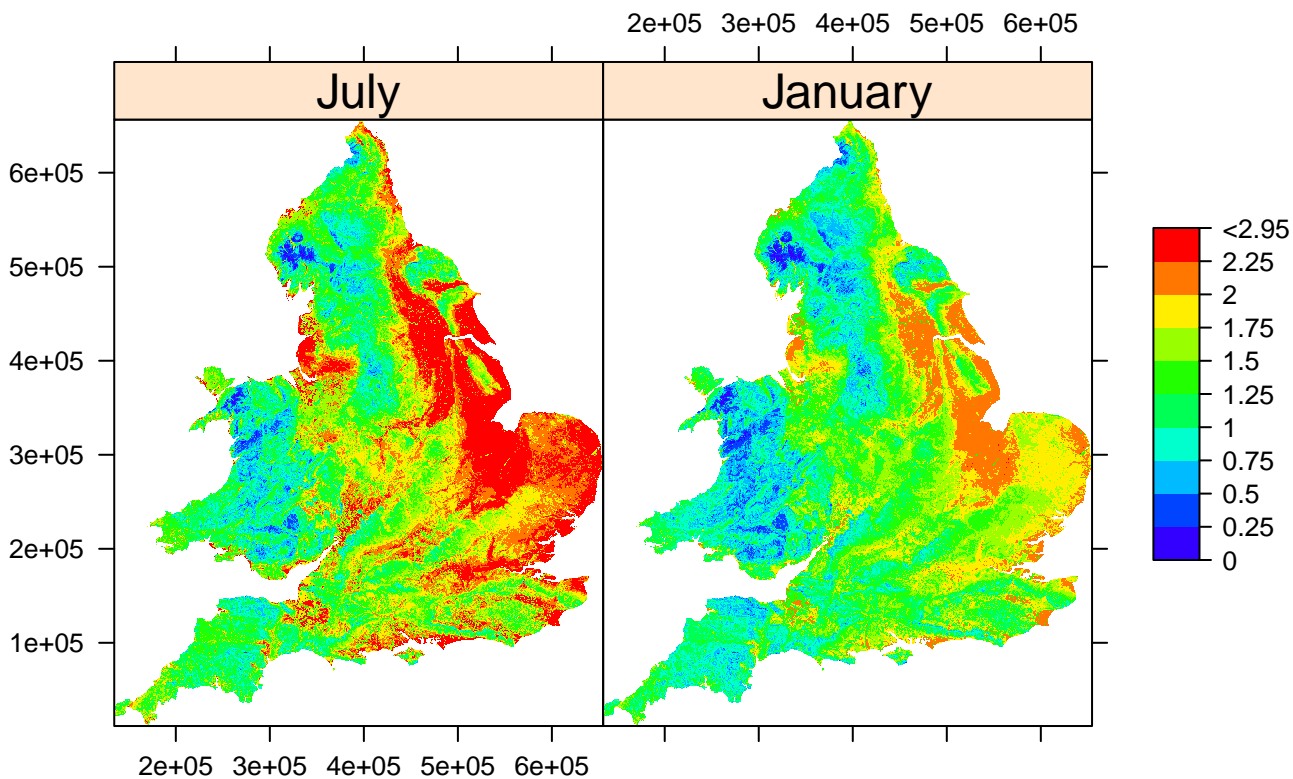

Supplement: Supplementary file 1 [file bg-11-1911-2014-supplement.zip › Fig8.pdf]

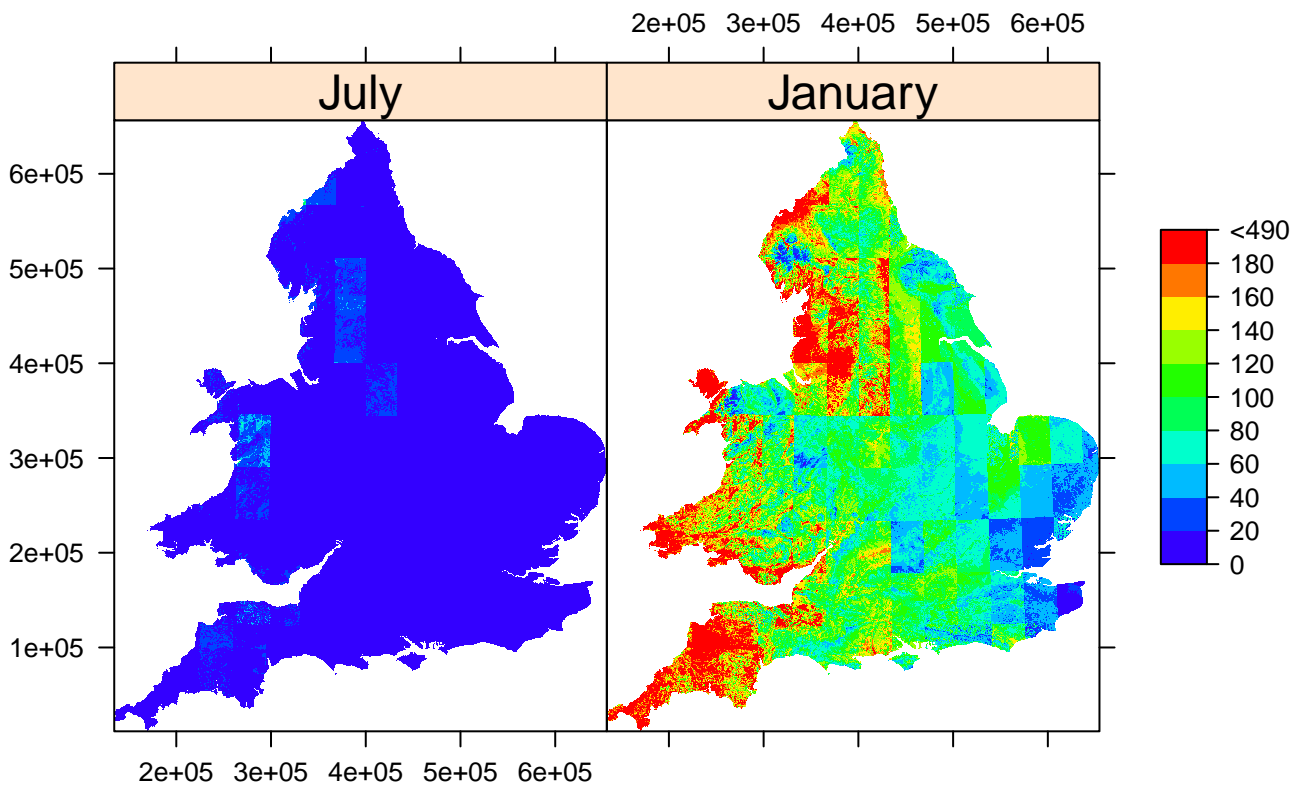

Supplement: Supplementary file 1 [file bg-11-1911-2014-supplement.zip › Fig9.pdf]
